# Supplementary material for: Genetic contribution of SCARB1 variants to lipid traits in African Blacks: a candidate gene association study
Source: PubMed Central journal article supplement (PMC4643515; doi:10.1186/s12881-015-0250-6), 2015-11-12
Supplement: 12881_2015_250_MOESM3_ESM.pdf [file 12881_2015_250_MOESM3_ESM.pdf]

**Table S3. Characteristics of 83 SCARB1 sequence variants identified in 95 African Blacks with extreme HDL-C levels.**

| SNP Name <sup>a</sup> | SNP ID <sup>b</sup> | Chr12 Position <sup>c</sup> | Location             | Amino Acid Change | Indels | Major/Minor Alleles | HWE P  | %Call Rate | SEQ MAF           |                                |                               | Selection for GT (n = 78) | Success in GT (n = 68) | Note                                                        |
|-----------------------|---------------------|-----------------------------|----------------------|-------------------|--------|---------------------|--------|------------|-------------------|--------------------------------|-------------------------------|---------------------------|------------------------|-------------------------------------------------------------|
|                       |                     |                             |                      |                   |        |                     |        |            | Total 95 Subjects | High HDL-C Group (48 subjects) | Low HDL-C Group (47 subjects) |                           |                        |                                                             |
| p972                  | rs181338950         | 125348548                   | 5' flanking-promoter |                   |        | C/T                 | 1      | 97.9       | 0.048             | 0.053                          | 0.043                         | Y                         | N                      | Failed GT assay design                                      |
| p1048insC (1048_1049) |                     | 125348472                   | Exon 1-5' UTR        |                   | insC   | [-/C]               | 1      | 98.9       | 0.005             | 0                              | <b>0.011</b>                  | Y                         | Y                      |                                                             |
| p1257                 | rs4238001           | 125348263                   | Exon 1               | Gly2Ser           |        | G/A                 | 0.1595 | 97.9       | 0.032             | 0.032                          | 0.033                         | Y                         | N                      | Failed GT run                                               |
| p1265                 | rs2070242           | 125348255                   | Exon 1               | Ser4Ser           |        | C/T                 | 0.4979 | 94.7       | 0.167             | 0.109                          | 0.227                         | Y                         | Y                      |                                                             |
| p1316                 | rs10396208          | 125348204                   | Exon 1               | Cys21Cys          |        | C/T                 | 0.5545 | 94.7       | 0.061             | 0.033                          | 0.091                         | Y                         | Y                      |                                                             |
| p1419                 | rs201717369         | 125348101                   | Intron 1             |                   |        | G/A                 | 1      | 98.9       | 0.021             | 0.021                          | 0.022                         | Y                         | Y                      |                                                             |
| p46964                | rs114061302         | 125302556                   | Intron 1             |                   |        | G/A                 | 1      | 100        | 0.032             | 0.031                          | 0.032                         | Y                         | Y                      |                                                             |
| p49537                | rs7305310           | 125299983                   | Intron 2             |                   |        | C/T                 | 0.8226 | 100        | 0.095             | 0.094                          | 0.096                         | Y                         | Y                      |                                                             |
| p49570delC            | rs145376237         | 125299950                   | Intron 2             |                   | delC   | [C/-]               | 0.5967 | 100        | 0.242             | 0.25                           | 0.234                         | Y                         | Y                      |                                                             |
| p49690                | rs4765615           | 125299830                   | Intron 2             |                   |        | G/A                 | 0.1327 | 100        | 0.447             | 0.365                          | 0.532                         | Y                         | Y                      |                                                             |
| p49759                | rs146272788         | 125299761                   | Intron 2             |                   |        | C/T                 | 1      | 100        | 0.005             | <b>0.01</b>                    | 0                             | Y                         | Y                      |                                                             |
| p49978                | rs5891              | 125299542                   | Exon 3               | Val135Ile         |        | G/A                 | 1      | 100        | 0.011             | <b>0.021</b>                   | 0                             | Y                         | Y                      |                                                             |
| p50024                | rs368880622         | 125299496                   | Intron 3             |                   |        | G/T                 | 1      | 100        | 0.005             | <b>0.01</b>                    | 0                             | Y                         | Y                      |                                                             |
| p50118                | rs58710319          | 125299402                   | Intron 3             |                   |        | C/T                 | 1      | 100        | 0.021             | 0.021                          | 0.021                         | Y                         | Y                      |                                                             |
| p50151                | rs2278986           | 125299369                   | Intron 3             |                   |        | T/C                 | 1      | 98.9       | 0.176             | 0.223                          | 0.128                         | Y                         | Y                      |                                                             |
| p50380                | rs141748317         | 125299140                   | Intron 3             |                   |        | A/G                 | 1      | 100        | 0.011             | 0.01                           | 0.011                         | Y                         | Y                      |                                                             |
| p50489                | rs61320152          | 125299031                   | Intron 3             |                   |        | G/T                 | 1      | 100        | 0.021             | 0.021                          | 0.021                         | Y                         | Y                      |                                                             |
| p50954                |                     | 125298566                   | Intron 4             |                   |        | T/C                 | 1      | 100        | 0.005             | <b>0.01</b>                    | 0                             | Y                         | Y                      |                                                             |
| p52919                |                     | 125296601                   | Intron 4             |                   |        | G/T                 | 1      | 100        | 0.011             | 0                              | <b>0.021</b>                  | Y                         | Y                      |                                                             |
| p52956                | rs77740046          | 125296564                   | Intron 4             |                   |        | C/T                 | 1      | 100        | 0.047             | 0.052                          | 0.043                         | Y                         | Y                      |                                                             |
| p52995                | rs113910315         | 125296525                   | Intron 4-splice site |                   |        | T/G                 | 1      | 100        | 0.005             | 0                              | <b>0.011</b>                  | Y                         | Y                      |                                                             |
| p53128                | rs372212527         | 125296392                   | Intron 5             |                   |        | C/T                 | 1      | 95.8       | 0.005             | <b>0.011</b>                   | 0                             | Y                         | N                      | Failed GT run Not selected, tagged with p52956 <sup>d</sup> |
| p53159                | rs59809936          | 125296361                   | Intron 5             |                   |        | G/A                 | 1      | 95.8       | 0.049             | 0.054                          | 0.044                         | N                         |                        |                                                             |
| p53359                | rs112371713         | 125296161                   | Intron 5             |                   |        | G/A                 | 1      | 100        | 0.121             | 0.156                          | 0.085                         | Y                         | Y                      |                                                             |
| p53372                | rs115604379         | 125296148                   | Intron 5             |                   |        | C/T                 | 1      | 100        | 0.016             | <b>0.031</b>                   | 0                             | Y                         | Y                      |                                                             |
| p53481                | rs143611171         | 125296039                   | Intron 5             |                   |        | C/T                 | 0.7877 | 95.8       | 0.099             | 0.109                          | 0.089                         | Y                         | N                      | Failed GT run                                               |

| SNP Name <sup>a</sup> | SNP ID <sup>b</sup> | Chr12 Position <sup>c</sup> | Location             | Amino Acid Change | Indels | Major/Minor Alleles | HWE P  | %Call Rate | SEQ MAF           |                                |                               | Selection for GT (n = 78) | Success in GT (n = 68) | Note                                          |
|-----------------------|---------------------|-----------------------------|----------------------|-------------------|--------|---------------------|--------|------------|-------------------|--------------------------------|-------------------------------|---------------------------|------------------------|-----------------------------------------------|
|                       |                     |                             |                      |                   |        |                     |        |            | Total 95 Subjects | High HDL-C Group (48 subjects) | Low HDL-C Group (47 subjects) |                           |                        |                                               |
| p54445                | rs60910935          | 125295075                   | Intron 5             |                   |        | A/G                 | 1      | 100        | 0.032             | 0.021                          | 0.043                         | Y                         | Y                      |                                               |
| p54475                | rs60227139          | 125295045                   | Intron 5             |                   |        | C/T                 | 1      | 100        | 0.032             | 0.021                          | 0.043                         | Y                         | Y                      |                                               |
| p54492                | rs61762481          | 125295028                   | Intron 5             |                   |        | G/A                 | 0.5776 | 100        | 0.111             | 0.062                          | 0.16                          | Y                         | Y                      |                                               |
| p54611                |                     | 125294909                   | Intron 5             |                   |        | T/C                 | 1      | 100        | 0.005             | 0                              | <b>0.011</b>                  | Y                         | Y                      |                                               |
| p54627                |                     | 125294893                   | Intron 5             |                   |        | G/C                 | 1      | 100        | 0.005             | <b>0.01</b>                    | 0                             | Y                         | Y                      |                                               |
| p54856                |                     | 125294664                   | Intron 6             |                   |        | C/T                 | 1      | 100        | 0.005             | 0                              | <b>0.011</b>                  | Y                         | Y                      |                                               |
| p56845                | rs838902            | 125292675                   | Intron 6             |                   |        | A/G                 | 0.6252 | 98.9       | 0.41              | 0.385                          | 0.435                         | Y                         | Y                      |                                               |
| p57004                | rs187562853         | 125292516                   | Intron 6             |                   |        | G/A                 | 1      | 100        | 0.021             | <b>0.042</b>                   | 0                             | Y                         | Y                      |                                               |
| p57107                | rs5892              | 125292413                   | Exon 7               | Phe301Phe         |        | C/T                 | 1      | 100        | 0.026             | 0.031                          | 0.021                         | Y                         | Y                      |                                               |
| p57508                | rs71458866          | 125292012                   | Intron 7             |                   |        | G/A                 | 0.646  | 98.9       | 0.106             | 0.073                          | 0.141                         | Y                         | Y                      |                                               |
| p57592                | rs838903            | 125291928                   | Intron 7             |                   |        | G/A                 | 0.1308 | 98.9       | 0.356             | 0.323                          | 0.391                         | Y                         | Y                      |                                               |
| p64772                | rs5888              | 125284748                   | Exon 8               | Ala350Ala         |        | C/T                 | 1      | 100        | 0.116             | 0.125                          | 0.106                         | Y                         | Y                      |                                               |
| p64923                | rs838915            | 125284597                   | Intron 8             |                   |        | C/A                 | 0.2751 | 100        | 0.137             | 0.156                          | 0.117                         | Y                         | Y                      |                                               |
| p69699                | rs10396210          | 125279821                   | Intron 8-splice site |                   |        | G/A                 | 1      | 98.9       | 0.138             | 0.096                          | 0.181                         | Y                         | Y                      |                                               |
| p69994                | rs188094006         | 125279526                   | Intron 9             |                   |        | C/T                 | 1      | 100        | 0.005             | <b>0.01</b>                    | 0                             | Y                         | N                      | Failed GT run                                 |
| p69995delC            | rs5801571           | 125279525                   | Intron 9             |                   | delC   | [C/-]               | 0.7558 | 100        | 0.253             | 0.25                           | 0.255                         | Y                         | Y                      |                                               |
| p70088                | rs117585141         | 125279432                   | Intron 9             |                   |        | G/A                 | 1      | 100        | 0.158             | 0.125                          | 0.191                         | Y                         | N                      | Failed GT run                                 |
| p70129                | rs1814575           | 125279391                   | Intron 9             |                   |        | C/T                 | 1      | 100        | 0.047             | 0.052                          | 0.043                         | Y                         | N                      | Failed GT run                                 |
| p70148                | rs183061101         | 125279372                   | Intron 9             |                   |        | T/C                 | 1      | 100        | 0.011             | 0.01                           | 0.011                         | Y                         | N                      | Failed GT run                                 |
| p70201                |                     | 125279319                   | Intron 9             |                   |        | T/C                 | 1      | 100        | 0.005             | <b>0.01</b>                    | 0                             | Y                         | Y                      |                                               |
| p70292                | rs150388176         | 125279228                   | Intron 9             |                   |        | C/T                 | 1      | 98.9       | 0.016             | 0                              | <b>0.033</b>                  | Y                         | N                      | Failed GT assay design                        |
| p77181                | rs146246031         | 125272339                   | Intron 9             |                   |        | T/C                 | 1      | 98.9       | 0.005             | <b>0.01</b>                    | 0                             | Y                         | Y                      |                                               |
| p77250                | rs201901986         | 125272270                   | Intron 9             |                   |        | G/T                 | 0.8226 | 100        | 0.095             | 0.052                          | 0.138                         | N                         |                        | Not selected, tagged with p77251 <sup>d</sup> |
| p77251                | rs34339961          | 125272269                   | Intron 9             |                   |        | A/T                 | 0.8954 | 97.9       | 0.091             | 0.043                          | 0.138                         | Y                         | Y                      |                                               |
| p77381                | rs138499966         | 125272139                   | Intron 9             |                   |        | T/C                 | 1      | 100        | 0.005             | <b>0.01</b>                    | 0                             | Y                         | Y                      |                                               |
| p77620                | rs377124254         | 125271900                   | Intron 10            |                   |        | G/A                 | 1      | 100        | 0.005             | <b>0.01</b>                    | 0                             | Y                         | Y                      |                                               |
| p77682                | rs150082885         | 125271838                   | Intron 10            |                   |        | A/G                 | 0.0317 | 100        | 0.016             | 0.01                           | 0.021                         | Y                         | Y                      |                                               |
| p77704                |                     | 125271816                   | Intron 10            |                   |        | C/A                 | 1      | 100        | 0.005             | <b>0.01</b>                    | 0                             | Y                         | Y                      |                                               |
| p77842                | rs2272310           | 125271678                   | Intron 10            |                   |        | G/A                 | 1      | 100        | 0.084             | 0.094                          | 0.074                         | Y                         | Y                      |                                               |
| p78255                | rs184052375         | 125271265                   | Intron 10            |                   |        | A/G                 | 1      | 100        | 0.016             | 0.021                          | 0.011                         | Y                         | Y                      |                                               |
| p78402                | rs838898            | 125271118                   | Intron 10            |                   |        | G/A                 | 1      | 100        | 0.063             | 0.073                          | 0.053                         | Y                         | Y                      |                                               |
| p78430                | rs838897            | 125271090                   | Intron 10            |                   |        | C/G                 | 0.3016 | 94.7       | 0.356             | 0.344                          | 0.367                         | Y                         | Y                      |                                               |
| p78747                | rs2293440           | 125270773                   | Intron 11            |                   |        | T/C                 | 0.8126 | 96.8       | 0.315             | 0.244                          | 0.383                         | Y                         | Y                      |                                               |

| SNP Name <sup>a</sup> | SNP ID <sup>b</sup> | Chr12 Position <sup>c</sup> | Location                    | Amino Acid Change     | Indels | Major/Minor Alleles | HWE P  | %Call Rate | SEQ MAF           |                                |                               | Selection for GT (n = 78) | Success in GT (n = 68) | Note                                          |
|-----------------------|---------------------|-----------------------------|-----------------------------|-----------------------|--------|---------------------|--------|------------|-------------------|--------------------------------|-------------------------------|---------------------------|------------------------|-----------------------------------------------|
|                       |                     |                             |                             |                       |        |                     |        |            | Total 95 Subjects | High HDL-C Group (48 subjects) | Low HDL-C Group (47 subjects) |                           |                        |                                               |
| p78791                | rs75289200          | 125270729                   | Intron 11                   |                       |        | T/C                 | 1      | 98.9       | 0.043             | 0.043                          | 0.043                         | Y                         | Y                      |                                               |
| p81863                | rs185445624         | 125267657                   | Intron 11                   |                       |        | G/A                 | 1      | 100        | 0.005             | 0                              | 0.011                         | Y                         | Y                      |                                               |
| p82019                | rs838890            | 125267501                   | Intron 11                   |                       |        | C/T                 | 1      | 100        | 0.032             | 0.031                          | 0.032                         | Y                         | Y                      |                                               |
| p82264                | rs141545424         | 125267256                   | Exon 12                     | Gly501Gly             |        | C/A                 | 1      | 100        | 0.005             | 0.01                           | 0                             | Y                         | Y                      |                                               |
| p82340                | rs77483223          | 125267180                   | Intron 12                   |                       |        | G/A                 | 1      | 100        | 0.005             | 0                              | 0.011                         | Y                         | Y                      |                                               |
| p82369                | rs75446635          | 125267151                   | Intron 12                   |                       |        | G/A                 | 1      | 100        | 0.032             | 0.042                          | 0.021                         | Y                         | Y                      |                                               |
| p82434                | rs838889            | 125267086                   | Intron 12                   |                       |        | T/C                 | 1      | 100        | 0.032             | 0.031                          | 0.032                         | Y                         | Y                      |                                               |
| p86245                | rs188375019         | 125263275                   | Intron 12                   |                       |        | C/T                 | 1      | 98.9       | 0.032             | 0.031                          | 0.033                         | Y                         | Y                      |                                               |
| p86276                | rs747155            | 125263244                   | Intron 12                   |                       |        | C/T                 | 0.8101 | 98.9       | 0.122             | 0.16                           | 0.085                         | Y                         | Y                      |                                               |
| p86316                | rs701104            | 125263204                   | Intron 12                   |                       |        | G/T                 | 1      | 100        | 0.032             | 0.021                          | 0.043                         | Y                         | Y                      |                                               |
| p86481                | rs701103            | 125263039                   | Exon 13-3' UTR              | Gly499Arg (isoform 2) |        | G/A                 | 0.4173 | 97.9       | 0.237             | 0.298                          | 0.174                         | Y                         | Y                      |                                               |
| p86967                | rs187492239         | 125262553                   | Exon 13-3' UTR              |                       |        | A/G                 | 1      | 97.9       | 0.032             | 0.032                          | 0.033                         | Y                         | Y                      |                                               |
| p87011                | rs58032386          | 125262509                   | Exon 13-3' UTR              |                       |        | C/T                 | 0.3196 | 100        | 0.126             | 0.104                          | 0.149                         | Y                         | Y                      |                                               |
| p87195                | rs10396211          | 125262325                   | Exon 13-3' UTR              |                       |        | G/C                 | 0.8101 | 98.9       | 0.122             | 0.094                          | 0.152                         | N                         |                        | Not selected, tagged with p87011 <sup>d</sup> |
| p87266                | rs150512235         | 125262254                   | Exon 13-3' UTR <sup>e</sup> |                       |        | T/C                 | 1      | 100        | 0.032             | 0.042                          | 0.021                         | Y                         | Y                      |                                               |
| p87416                | rs838884            | 125262104                   | 3' flanking                 |                       |        | C/T                 | 0.6922 | 97.9       | 0.301             | 0.323                          | 0.278                         | N                         |                        | Not selected, tagged with p87723 <sup>d</sup> |
| p87459                |                     | 125262061                   | 3' flanking                 |                       |        | C/T                 | 1      | 98.9       | 0.005             | 0.01                           | 0                             | Y                         | N                      | Failed GT run                                 |
| p87611                | rs190688220         | 125261909                   | 3' flanking                 |                       |        | C/T                 | 1      | 100        | 0.032             | 0.031                          | 0.032                         | Y                         | Y                      |                                               |
| p87681                | rs838883            | 125261839                   | 3' flanking                 |                       |        | G/A                 | 1      | 100        | 0.032             | 0.021                          | 0.043                         | Y                         | Y                      |                                               |
| p87694                |                     | 125261826                   | 3' flanking                 |                       |        | C/T                 | 1      | 100        | 0.005             | 0.01                           | 0                             | Y                         | Y                      |                                               |
| p87707                | rs838882            | 125261813                   | 3' flanking                 |                       |        | G/A                 | 0.9969 | 98.9       | 0.303             | 0.333                          | 0.272                         | N                         |                        | Not selected, tagged with p87723 <sup>d</sup> |
| p87723                | rs838881            | 125261797                   | 3' flanking                 |                       |        | C/T                 | 0.6922 | 97.9       | 0.301             | 0.326                          | 0.277                         | Y                         | Y                      |                                               |
| p87749                | rs76465225          | 125261771                   | 3' flanking                 |                       |        | G/A                 | 0.3707 | 100        | 0.095             | 0.094                          | 0.096                         | Y                         | Y                      |                                               |
| p87927                | rs838880            | 125261593                   | 3' flanking                 |                       |        | G/A                 | 1      | 100        | 0.226             | 0.25                           | 0.202                         | Y                         | Y                      |                                               |

del, deletion; GT, genotyping; HDL-C, high-density lipoprotein cholesterol; HWE, Hardy-Weinberg equilibrium; Indels, insertion and deletion variations; ins, insertion; MAF, minor allele frequency; SEQ, sequencing; SNP, single nucleotide polymorphism; UTR, untranslated region. N, no; Y, yes.

All alleles on the reverse strand. Splice site is defined as ± 20 bp from the start or end of an exon.

All 10 novel variants identified in this study have been submitted to dbSNP database (batch ID: SCARB1\_AB): [http://www.ncbi.nlm.nih.gov/SNP/snp\\_viewTable.cgi?handle=KAMBOH](http://www.ncbi.nlm.nih.gov/SNP/snp_viewTable.cgi?handle=KAMBOH).

MAFs of the variants that were specifically found in only one extreme HDL-C group are shown in **bold**.

<sup>a, c</sup> RefSeq of SCARB1: hg19, NM\_005505 (CHIP Bioinformatics).

<sup>b</sup> dbSNP build 139: GRCh37.p10.

<sup>d</sup> LD plots of all 83 sequence variants and the 32 sequence variants with MAF ≥5% are shown in Additional file 5 Figure S1 and Additional file 6 Figure S2, respectively.

<sup>e</sup> Close to a miRNA-145 seed site based on TargetScanHuman (version 6.2, <http://www.targetscan.org/>).
