# Supplementary material for: Genetic contribution of SCARB1 variants to lipid traits in African Blacks: a candidate gene association study
Source: PubMed Central journal article supplement (PMC4643515; doi:10.1186/s12881-015-0250-6), 2015-11-12
Supplement: 12881_2015_250_MOESM4_ESM.pdf [file 12881_2015_250_MOESM4_ESM.pdf]

**Table S4. Characteristics of 10 *SCARB1* novel<sup>a</sup> variants identified by sequencing.**

| SNP Name <sup>b</sup> | Chr12 Position <sup>c</sup> | Location      | RegulomeDB Score <sup>d</sup> | Major/Minor Alleles | MAF                 | MA Effect on Traits <sup>e</sup> |
|-----------------------|-----------------------------|---------------|-------------------------------|---------------------|---------------------|----------------------------------|
| p1048insC (1048_1049) | 125348472                   | Exon 1-5' UTR | 2a                            | [-/C]               | 0.0079              |                                  |
| p50954                | 125298566                   | Intron 4      | 5                             | T/C                 | 0.0007              |                                  |
| p52919                | 125296601                   | Intron 4      | 5                             | G/T                 | 0.0013              | ↓ HDL-C, ↓ ApoA-I                |
| p54611                | 125294909                   | Intron 5      | 4                             | T/C                 | 0.0007              | ↓ HDL-C, ↓ ApoA-I                |
| p54627                | 125294893                   | Intron 5      | 4                             | G/C                 | 0.0020              |                                  |
| p54856                | 125294664                   | Intron 6      | 4                             | C/T                 | 0.0007              | ↓ HDL-C, ↓ ApoA-I                |
| p70201 <sup>f</sup>   | 125279319                   | Intron 9      | 6                             | T/C                 | 0.0010              |                                  |
| p77704                | 125271816                   | Intron 10     | 5                             | C/A                 | 0.0040              |                                  |
| p87459                | 125262061                   | 3' flanking   | 4                             | C/T                 | 0.0050 <sup>g</sup> |                                  |
| p87694                | 125261826                   | 3' flanking   | 5                             | C/T                 | 0.0020              |                                  |

ApoA-I, apolipoprotein A-I; HDL-C, high-density lipoprotein cholesterol; ins, insertion; MA, minor allele; MAF, minor allele frequency; SNP; single nucleotide polymorphism; UTR, untranslated region. ↓, decreased.  
All alleles on the reverse strand.

All 10 novel variants identified in this study have been submitted to dbSNP database (batch ID: SCARB1\_AB):

[http://www.ncbi.nlm.nih.gov/SNP/snp\\_viewTable.cgi?handle=KAMBOH](http://www.ncbi.nlm.nih.gov/SNP/snp_viewTable.cgi?handle=KAMBOH).

<sup>a</sup> dbSNP build 139: GRCh37.p10.

<sup>b, c</sup> RefSeq of *SCARB1*: hg19, NM\_005505 (CHIP Bioinformatics).

<sup>d</sup> The RegulomeDB (version 1.0) scoring scheme: **score 1a**, expression quantitative trait loci (eQTL) + transcription factor (TF) binding + matched TF motif + matched DNase Footprint + DNase peak; **score 1b**, eQTL + TF binding + any motif + DNase Footprint + DNase peak; **score 1c**, eQTL + TF binding + matched TF motif + DNase peak; **score 1d**, eQTL + TF binding + any motif + DNase peak; **score 1e**, eQTL + TF binding + matched TF motif; **score 1f**, eQTL + TF binding / DNase peak; **score 2a**, TF binding + matched TF motif + matched DNase Footprint + DNase peak; **score 2b**, TF binding + any motif + DNase Footprint + DNase peak; **score 2c**, TF binding + matched TF motif + DNase peak; **score 3a**, TF binding + any motif + DNase peak; **score 3b**, TF binding + matched TF motif; **score 4**, TF binding + DNase peak; **score 5**, TF binding or DNase peak; **score 6**, others; **score 7**, no data (see <http://regulome.stanford.edu/help>). See detailed functional assignments in Additional file 19 Table S13.

<sup>e</sup> Evidence of association is based on single-site analysis; see details in Additional file 14 Table S9 and Additional file 15 Table S10.

<sup>f</sup> p70201/chr12:125279319 was excluded from gene-based, single-site, and haplotype analyses, but included in rare variant analysis; see details in Additional file 9 Table S6 and Figure 1.

<sup>g</sup> MAF based on sequencing data/sample due to genotyping failure.
