# Supplementary material for: Genetic contribution of SCARB1 variants to lipid traits in African Blacks: a candidate gene association study
Source: PubMed Central journal article supplement (PMC4643515; doi:10.1186/s12881-015-0250-6), 2015-11-12
Supplement: 12881_2015_250_MOESM5_ESM.pdf [file 12881_2015_250_MOESM5_ESM.pdf]

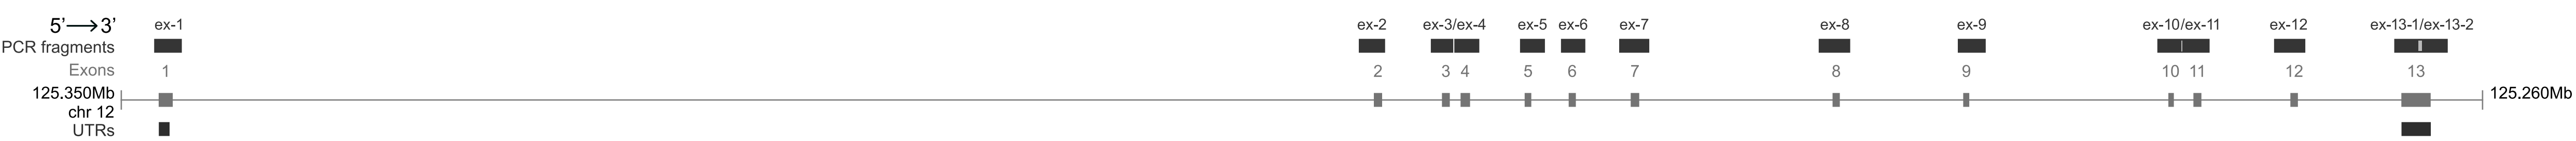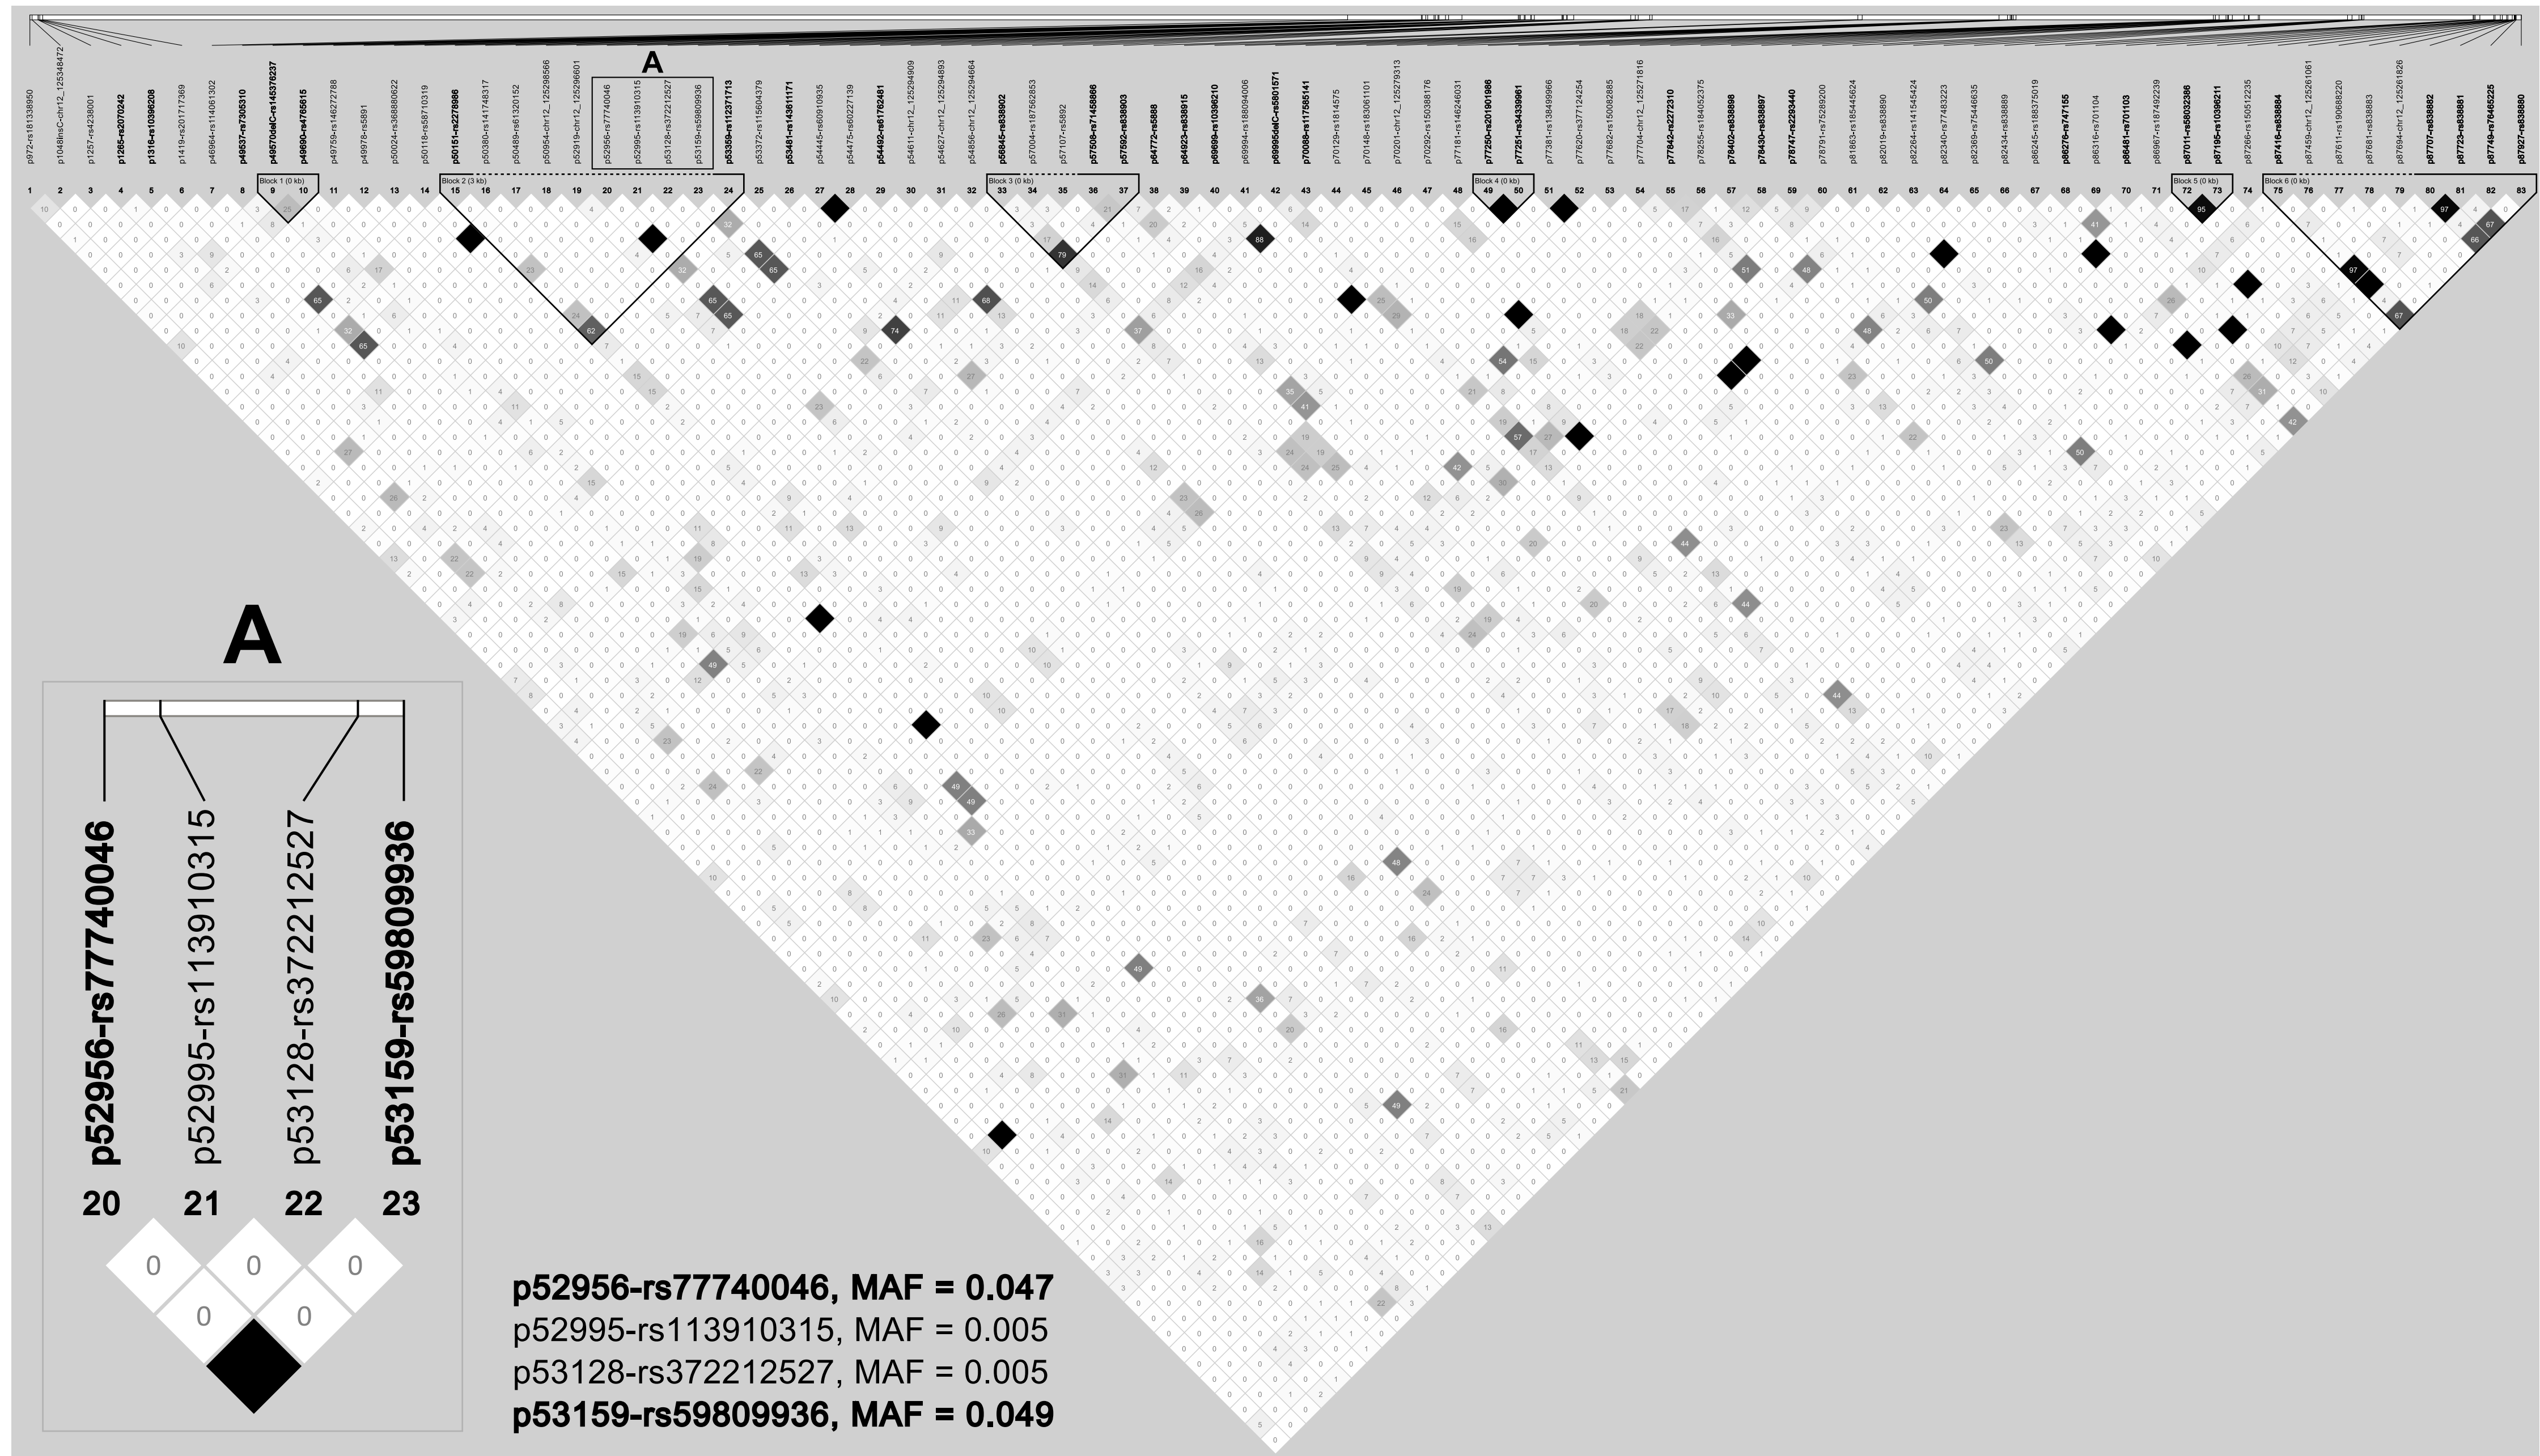

LD structure by sequencing

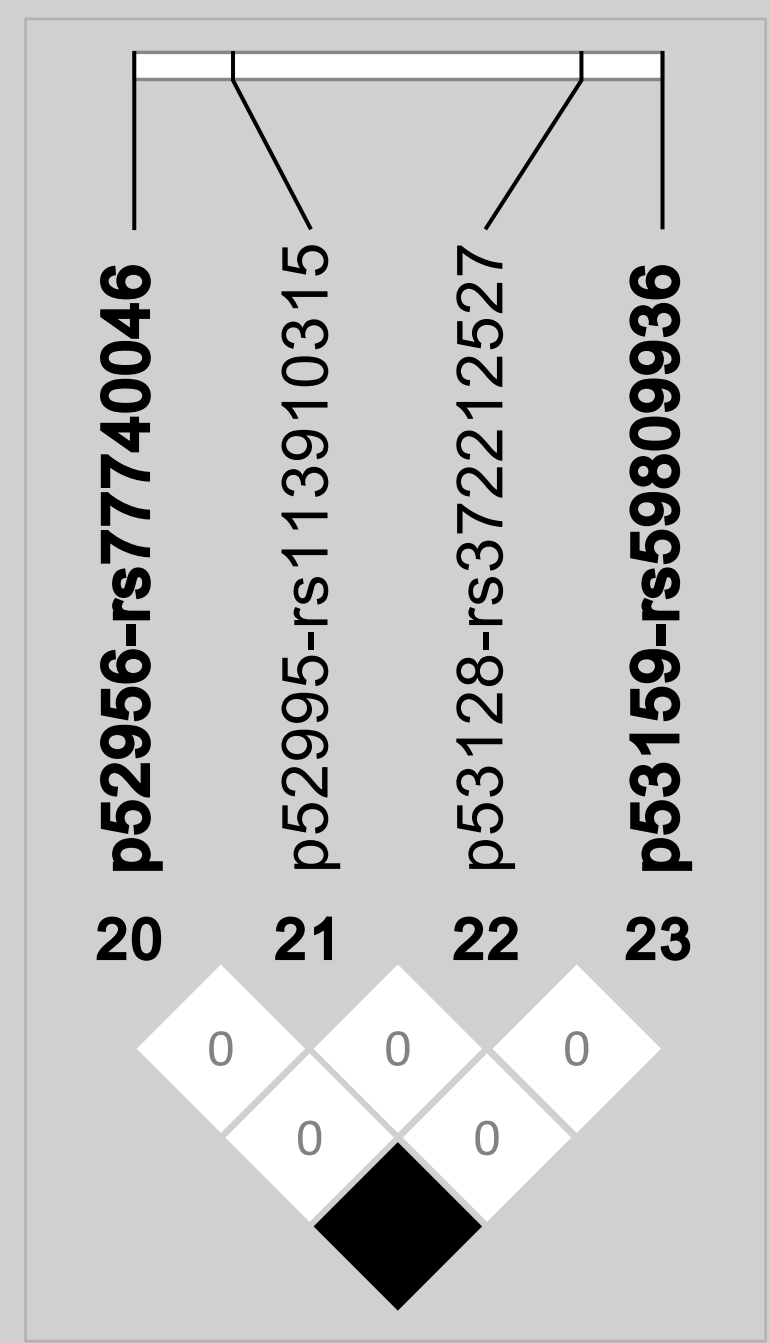

p52956-rs77740046, MAF = 0.047  
 p52995-rs113910315, MAF = 0.005  
 p53128-rs372212527, MAF = 0.005  
 p53159-rs59809936, MAF = 0.049
