# Supplementary material for: Genetic contribution of SCARB1 variants to lipid traits in African Blacks: a candidate gene association study
Source: PubMed Central journal article supplement (PMC4643515; doi:10.1186/s12881-015-0250-6), 2015-11-12
Supplement: 12881_2015_250_MOESM7_ESM.pdf [file 12881_2015_250_MOESM7_ESM.pdf]

**Table S5. List of 77 SCARB1 HapMap<sup>a</sup>-YRI tagSNPs (using Tagger analysis for variants with MAF  $\geq 5\%$  and  $r^2 \geq 0.80$ , capturing a total of 108 common HapMap-YRI tagSNPs with a mean  $r^2$  of 0.98; see LD plot in Additional file 8 Figure S3).**

| Bin # | TagSNP                       | Alleles Captured                     |
|-------|------------------------------|--------------------------------------|
| 1     | rs9919713                    | rs838867,rs838865,rs1672879,rs701107 |
| 2     | rs838893                     | rs838892,rs838894,rs838891           |
| 3     | rs4765178                    | rs4765616,rs4765618,rs7135223        |
| 4     | <b>rs838881</b>              | rs838882,rs838879,rs838884           |
| 5     | rs10846751                   | rs4765623,rs10846748,rs4765621       |
| 6     | rs2343394                    | rs2278986, rs745529                  |
| 7     | rs838912 <sup>b</sup>        | rs5888 <sup>p</sup> ,rs10773105      |
| 8     | rs12819677                   | rs989892,rs3782287                   |
| 9     | rs7137797                    | rs7306660                            |
| 10    | rs4765614                    | rs4765613                            |
| 11    | rs10773111                   | rs7954697                            |
| 12    | rs12370382                   | rs12582221                           |
| 13    | rs11057844                   | rs7954519                            |
| 14    | rs838905                     | rs11057818                           |
| 15    | rs12229555                   | rs10846753                           |
| 16    | rs4765622                    | rs4765624                            |
| 17    | rs961170                     | rs961169                             |
| 18    | rs3924313                    |                                      |
| 19    | rs838866                     |                                      |
| 20    | rs10846744                   |                                      |
| 21    | rs10744181                   |                                      |
| 22    | rs4765181                    |                                      |
| 23    | rs7135117                    |                                      |
| 24    | rs7138304                    |                                      |
| 25    | rs838887                     |                                      |
| 26    | rs12581963                   |                                      |
| 27    | rs11057853 <sup>b</sup>      |                                      |
| 28    | rs11608336                   |                                      |
| 29    | rs10846749                   |                                      |
| 30    | rs838896 <sup>b</sup>        |                                      |
| 31    | rs6488944                    |                                      |
| 32    | rs10773112                   |                                      |
| 33    | <b>rs4765615<sup>b</sup></b> |                                      |
| 34    | rs11057869                   |                                      |
| 35    | rs7954022                    |                                      |
| 36    | rs11057852                   |                                      |
| 37    | rs6488943                    |                                      |
| 38    | rs11057820                   |                                      |
| 39    | rs10744182                   |                                      |
| 40    | rs838861                     |                                      |
| 41    | rs10846745                   |                                      |
| 42    | rs838911                     |                                      |

|    |                         |  |
|----|-------------------------|--|
| 43 | rs4765180 <sup>e</sup>  |  |
| 44 | <b>rs10396210</b>       |  |
| 45 | rs838862                |  |
| 46 | rs7967521               |  |
| 47 | <b>rs2272310</b>        |  |
| 48 | rs865716                |  |
| 49 | rs12297372              |  |
| 50 | rs7134858 <sup>b</sup>  |  |
| 51 | rs7139401               |  |
| 52 | rs1726374               |  |
| 53 | rs12580803              |  |
| 54 | rs701106 <sup>b</sup>   |  |
| 55 | rs838909                |  |
| 56 | rs11057864              |  |
| 57 | <b>rs5892</b>           |  |
| 58 | rs10846739              |  |
| 59 | <b>rs838880</b>         |  |
| 60 | rs866793 <sup>d</sup>   |  |
| 61 | <b>rs2293440</b>        |  |
| 62 | rs10846738              |  |
| 63 | rs838910                |  |
| 64 | rs12425134              |  |
| 65 | rs838900                |  |
| 66 | rs1902569 <sup>b</sup>  |  |
| 67 | rs10773107              |  |
| 68 | rs10396211 <sup>c</sup> |  |
| 69 | rs11615630              |  |
| 70 | rs7301120               |  |
| 71 | rs11057838              |  |
| 72 | rs7967406               |  |
| 73 | rs7138386               |  |
| 74 | rs12831105              |  |
| 75 | rs11057830              |  |
| 76 | rs11057841              |  |
| 77 | rs11057851 <sup>b</sup> |  |

LD, linkage disequilibrium; MAF, minor allele frequency; SNP, single nucleotide polymorphism; YRI, Yoruba people of Ibadan, Nigeria.

Of 77 common HapMap-YRI tagSNPs, 69 HapMap-YRI tagSNPs were selected for genotyping in addition to seven tagSNPs that were already selected (Additional file 3 Table S3) based on our sequencing data (shown in **bold**), and one was tagged by another already selected sequence variant in our data (see below under "c").

Of these 69 common HapMap tagSNPs selected for genotyping, 68 were successfully genotyped, and 67 were advanced into the downstream analyses (Additional file 9 Table S6); see below under "d" the variant that was excluded from the downstream analyses as it failed quality control checks, and see below under "e" the variant that failed genotyping.

<sup>a</sup> HapMap release #27: NCBI build 36, dbSNP version 126.

<sup>b</sup> SNPs with nominally significant evidence of single-site association with either high-density lipoprotein cholesterol or apolipoprotein A-I ( $P < 0.05$ ; Additional file 14 Table S9 and Additional file 15 Table S10) observed in the current study.

<sup>c</sup> rs10396211 was not selected for genotyping. rs10396211 was tagged by one SNP identified by sequencing, rs58032386 ( $r^2 = 0.95$ ), in our sample (Enlarged view B in Additional file 6 Figure S2).

<sup>d</sup> rs866793 deviated from Hardy-Weinberg equilibrium and was excluded from the downstream analyses.

<sup>e</sup> rs4765180 failed genotyping and was excluded from the downstream analyses.
