# Supplementary material for: Genetic contribution of SCARB1 variants to lipid traits in African Blacks: a candidate gene association study
Source: PubMed Central journal article supplement (PMC4643515; doi:10.1186/s12881-015-0250-6), 2015-11-12
Supplement: 12881_2015_250_MOESM9_ESM.pdf [file 12881_2015_250_MOESM9_ESM.pdf]

**Table S6. Characteristics of 138 SCARB1 variants genotyped in the entire sample of 788 African Blacks.**

| SNP Name <sup>a</sup> | SNP ID <sup>b</sup> | Chr12 Position <sup>c</sup> | Location      | Amino acid Change | Major/Minor Alleles | HWE <i>P</i> | %Call Rate | MAF    | Source of Variants | Success in GT (n = 138) | Proceed to Analyses (n = 137) | Note |
|-----------------------|---------------------|-----------------------------|---------------|-------------------|---------------------|--------------|------------|--------|--------------------|-------------------------|-------------------------------|------|
| p1048insC (1048_1049) |                     | 125348472                   | Exon 1-5' UTR |                   | [-/C]               | 1            | 96.1       | 0.0079 | SEQ                | Y                       | Y                             |      |
| p1265                 | rs2070242           | 125348255                   | Exon 1        | Ser4Ser           | C/T                 | 0.8725       | 93.4       | 0.1284 | SEQ                | Y                       | Y                             |      |
| p1316                 | rs10396208          | 125348204                   | Exon 1        | Cys21Cys          | C/T                 | 0.1503       | 93.4       | 0.0476 | SEQ                | Y                       | Y                             |      |
| p1419                 | rs201717369         | 125348101                   | Intron 1      |                   | G/A                 | 0.1976       | 94.4       | 0.0121 | SEQ                | Y                       | Y                             |      |
| p4072                 | rs7139401           | 125345448                   | Intron 1      |                   | T/C                 | 0.331        | 95.1       | 0.4386 | HapMap             | Y                       | Y                             |      |
| p5055                 | rs11057869          | 125344465                   | Intron 1      |                   | G/A                 | 0.0974       | 97.7       | 0.0740 | HapMap             | Y                       | Y                             |      |
| p6600                 | rs12831105          | 125342920                   | Intron 1      |                   | C/T                 | 0.979        | 95.1       | 0.1188 | HapMap             | Y                       | Y                             |      |
| p7650                 | rs11615630          | 125341870                   | Intron 1      |                   | G/A                 | 0.4345       | 99         | 0.0436 | HapMap             | Y                       | Y                             |      |
| p10292                | rs4765181           | 125339228                   | Intron 1      |                   | G/T                 | 0.6396       | 98.4       | 0.2490 | HapMap             | Y                       | Y                             |      |
| p10991                | rs10773112          | 125338529                   | Intron 1      |                   | G/A                 | 0.8029       | 95.7       | 0.3534 | HapMap             | Y                       | Y                             |      |
| p13570                | rs11057864          | 125335950                   | Intron 1      |                   | G/T                 | 0.193        | 97.8       | 0.1180 | HapMap             | Y                       | Y                             |      |
| p16565                | rs10773111          | 125332955                   | Intron 1      |                   | G/A                 | 0.3383       | 98.1       | 0.1928 | HapMap             | Y                       | Y                             |      |
| p20207                | rs11057853          | 125329313                   | Intron 1      |                   | G/A                 | 0.7053       | 97.2       | 0.4484 | HapMap             | Y                       | Y                             |      |
| p20694                | rs11057852          | 125328826                   | Intron 1      |                   | G/A                 | 0.3519       | 94.3       | 0.1050 | HapMap             | Y                       | Y                             |      |
| p20741                | rs11057851          | 125328779                   | Intron 1      |                   | C/T                 | 0.4728       | 96.8       | 0.3237 | HapMap             | Y                       | Y                             |      |
| p21145                | rs3924313           | 125328375                   | Intron 1      |                   | C/T                 | 1            | 98.1       | 0.1772 | HapMap             | Y                       | Y                             |      |
| p22116                | rs12370382          | 125327404                   | Intron 1      |                   | G/A                 | 1            | 96.4       | 0.0645 | HapMap             | Y                       | Y                             |      |
| p22168                | rs7137797           | 125327352                   | Intron 1      |                   | T/C                 | 0.6804       | 94.9       | 0.3977 | HapMap             | Y                       | Y                             |      |
| p22331                | rs6488944           | 125327189                   | Intron 1      |                   | T/G                 | 0.2943       | 94.3       | 0.1474 | HapMap             | Y                       | Y                             |      |
| p22675                | rs12425134          | 125326845                   | Intron 1      |                   | G/T                 | 1            | 96.4       | 0.0526 | HapMap             | Y                       | Y                             |      |
| p28137                | rs12229555          | 125321383                   | Intron 1      |                   | A/G                 | 0.0888       | 95.9       | 0.3896 | HapMap             | Y                       | Y                             |      |
| p28692                | rs4765622           | 125320828                   | Intron 1      |                   | C/T                 | 0.2025       | 97         | 0.2565 | HapMap             | Y                       | Y                             |      |
| p28957                | rs11057844          | 125320563                   | Intron 1      |                   | G/A                 | 0.9612       | 96.4       | 0.2362 | HapMap             | Y                       | Y                             |      |
| p29749                | rs10846751          | 125319771                   | Intron 1      |                   | C/T                 | 0.6254       | 93.7       | 0.4492 | HapMap             | Y                       | Y                             |      |
| p31072                | rs10846749          | 125318448                   | Intron 1      |                   | C/G                 | 0.9027       | 96.6       | 0.4461 | HapMap             | Y                       | Y                             |      |
| p31938                | rs10744182          | 125317582                   | Intron 1      |                   | G/A                 | 0.9847       | 96.7       | 0.1837 | HapMap             | Y                       | Y                             |      |
| p32129                | rs10773107          | 125317391                   | Intron 1      |                   | G/T                 | 0.7277       | 96.8       | 0.1009 | HapMap             | Y                       | Y                             |      |
| p32273                | rs12580803          | 125317247                   | Intron 1      |                   | T/C                 | 2.00E-04     | 99         | 0.1006 | HapMap             | Y                       | Y                             |      |
| p32290                | rs10744181          | 125317230                   | Intron 1      |                   | T/C                 | 0.0356       | 92.3       | 0.1238 | HapMap             | Y                       | Y                             |      |
| p32395                | rs12581963          | 125317125                   | Intron 1      |                   | C/T                 | 0.5734       | 98.5       | 0.1314 | HapMap             | Y                       | Y                             |      |
| p32750                | rs7967521           | 125316770                   | Intron 1      |                   | A/G                 | 0.2715       | 91.9       | 0.3425 | HapMap             | Y                       | Y                             |      |

| SNP Name <sup>a</sup> | SNP ID <sup>b</sup> | Chr12 Position <sup>c</sup> | Location             | Amino acid Change | Major/Minor Alleles | HWE P  | %Call Rate | MAF    | Source of Variants | Success in GT (n = 138) | Proceed to Analyses (n = 137) | Note |
|-----------------------|---------------------|-----------------------------|----------------------|-------------------|---------------------|--------|------------|--------|--------------------|-------------------------|-------------------------------|------|
| p32777                | rs11057841          | 125316743                   | Intron 1             |                   | G/A                 | 0.3613 | 94.5       | 0.2805 | HapMap             | Y                       | Y                             |      |
| p32860                | rs7967406           | 125316660                   | Intron 1             |                   | A/C                 | 0.6852 | 98.6       | 0.0991 | HapMap             | Y                       | Y                             |      |
| p33531                | rs11057838          | 125315989                   | Intron 1             |                   | C/A                 | 0.7642 | 95.8       | 0.2278 | HapMap             | Y                       | Y                             |      |
| p36094                | rs11608336          | 125313426                   | Intron 1             |                   | G/A                 | 0.7249 | 95.4       | 0.1543 | HapMap             | Y                       | Y                             |      |
| p36461                | rs4765178           | 125313059                   | Intron 1             |                   | C/T                 | 0.8082 | 93.4       | 0.1671 | HapMap             | Y                       | Y                             |      |
| p36908                | rs10846745          | 125312612                   | Intron 1             |                   | C/G                 | 0.6639 | 97.2       | 0.3257 | HapMap             | Y                       | Y                             |      |
| p37095                | rs10846744          | 125312425                   | Intron 1             |                   | C/G                 | 0.0194 | 98.2       | 0.3056 | HapMap             | Y                       | Y                             |      |
| p41632                | rs6488943           | 125307888                   | Intron 1             |                   | A/C                 | 0.0626 | 91.5       | 0.2954 | HapMap             | Y                       | Y                             |      |
| p42467                | rs11057830          | 125307053                   | Intron 1             |                   | C/T                 | 0.3753 | 97.1       | 0.1523 | HapMap             | Y                       | Y                             |      |
| p45516                | rs1902569           | 125304004                   | Intron 1             |                   | G/A                 | 1      | 94.9       | 0.1544 | HapMap             | Y                       | Y                             |      |
| p45627                | rs12297372          | 125303893                   | Intron 1             |                   | A/G                 | 0.9301 | 95.1       | 0.0487 | HapMap             | Y                       | Y                             |      |
| p46964                | rs114061302         | 125302556                   | Intron 1             |                   | G/A                 | 1      | 98.1       | 0.0388 | SEQ                | Y                       | Y                             |      |
| p48969                | rs2343394           | 125300551                   | Intron 2             |                   | C/T                 | 0.401  | 98.6       | 0.1898 | HapMap             | Y                       | Y                             |      |
| p49537                | rs7305310           | 125299983                   | Intron 2             |                   | C/T                 | 0.0033 | 95.2       | 0.1007 | SEQ                | Y                       | Y                             |      |
| p49570delC            | rs145376237         | 125299950                   | Intron 2             |                   | [C/-]               | 0.8066 | 95.1       | 0.2276 | SEQ                | Y                       | Y                             |      |
| p49690                | rs4765615           | 125299830                   | Intron 2             |                   | G/A                 | 0.0084 | 93.9       | 0.4426 | SEQ                | Y                       | Y                             |      |
| p49759                | rs146272788         | 125299761                   | Intron 2             |                   | C/T                 | 1      | 95.2       | 0.0020 | SEQ                | Y                       | Y                             |      |
| p49978                | rs5891              | 125299542                   | Exon 3               | Val135Ile         | G/A                 | 1      | 99.1       | 0.0058 | SEQ                | Y                       | Y                             |      |
| p50024                | rs368880622         | 125299496                   | Intron 3             |                   | G/T                 | 1      | 96.7       | 0.0026 | SEQ                | Y                       | Y                             |      |
| p50118                | rs58710319          | 125299402                   | Intron 3             |                   | C/T                 | 1      | 97.6       | 0.0208 | SEQ                | Y                       | Y                             |      |
| p50151                | rs2278986           | 125299369                   | Intron 3             |                   | T/C                 | 0.3798 | 97.8       | 0.1933 | SEQ                | Y                       | Y                             |      |
| p50380                | rs141748317         | 125299140                   | Intron 3             |                   | A/G                 | 1      | 96.4       | 0.0112 | SEQ                | Y                       | Y                             |      |
| p50489                | rs61320152          | 125299031                   | Intron 3             |                   | G/T                 | 1      | 96.3       | 0.0257 | SEQ                | Y                       | Y                             |      |
| p50954                |                     | 125298566                   | Intron 4             |                   | T/C                 | 1      | 96.2       | 0.0007 | SEQ                | Y                       | Y                             |      |
| p51888                | rs7138304           | 125297632                   | Intron 4             |                   | C/T                 | 0.0164 | 95.8       | 0.1079 | HapMap             | Y                       | Y                             |      |
| p52096                | rs10846739          | 125297424                   | Intron 4             |                   | A/G                 | 0.0939 | 95.2       | 0.4693 | HapMap             | Y                       | Y                             |      |
| p52556                | rs11057820          | 125296964                   | Intron 4             |                   | G/A                 | 0.1399 | 98.4       | 0.1000 | HapMap             | Y                       | Y                             |      |
| p52610                | rs10846738          | 125296910                   | Intron 4             |                   | C/T                 | 0.9717 | 95.9       | 0.1349 | HapMap             | Y                       | Y                             |      |
| p52919                |                     | 125296601                   | Intron 4             |                   | G/T                 | 1      | 96.2       | 0.0013 | SEQ                | Y                       | Y                             |      |
| p52956                | rs77740046          | 125296564                   | Intron 4             |                   | C/T                 | 0.7667 | 95.3       | 0.0546 | SEQ                | Y                       | Y                             |      |
| p52995                | rs113910315         | 125296525                   | Intron 4-splice site |                   | T/G                 | 1      | 97.1       | 0.0020 | SEQ                | Y                       | Y                             |      |
| p53359                | rs112371713         | 125296161                   | Intron 5             |                   | G/A                 | 0.7881 | 93.9       | 0.1243 | SEQ                | Y                       | Y                             |      |
| p53372                | rs115604379         | 125296148                   | Intron 5             |                   | C/T                 | 1      | 96.6       | 0.0066 | SEQ                | Y                       | Y                             |      |
| p53790                | rs4765614           | 125295730                   | Intron 5             |                   | G/A                 | 0.2998 | 95.7       | 0.2653 | HapMap             | Y                       | Y                             |      |
| p54445                | rs60910935          | 125295075                   | Intron 5             |                   | A/G                 | 0.7209 | 92.6       | 0.0418 | SEQ                | Y                       | Y                             |      |

| SNP Name <sup>a</sup> | SNP ID <sup>b</sup> | Chr12 Position <sup>c</sup> | Location             | Amino acid Change | Major/Minor Alleles | HWE P  | %Call Rate | MAF    | Source of Variants | Success in GT (n = 138) | Proceed to Analyses (n = 137) | Note                                                                                                                                              |
|-----------------------|---------------------|-----------------------------|----------------------|-------------------|---------------------|--------|------------|--------|--------------------|-------------------------|-------------------------------|---------------------------------------------------------------------------------------------------------------------------------------------------|
| p54475                | rs60227139          | 125295045                   | Intron 5             |                   | C/T                 | 0.8434 | 95.8       | 0.0437 | SEQ                | Y                       | Y                             |                                                                                                                                                   |
| p54492                | rs61762481          | 125295028                   | Intron 5             |                   | G/A                 | 1      | 99.1       | 0.1005 | SEQ                | Y                       | Y                             |                                                                                                                                                   |
| p54611                |                     | 125294909                   | Intron 5             |                   | T/C                 | 1      | 97.1       | 0.0007 | SEQ                | Y                       | Y                             |                                                                                                                                                   |
| p54627                |                     | 125294893                   | Intron 5             |                   | G/C                 | 1      | 97         | 0.0020 | SEQ                | Y                       | Y                             |                                                                                                                                                   |
| p54856                |                     | 125294664                   | Intron 6             |                   | C/T                 | 1      | 97.1       | 0.0007 | SEQ                | Y                       | Y                             |                                                                                                                                                   |
| p55923                | rs838900            | 125293597                   | Intron 6             |                   | G/A                 | 0.6724 | 96.4       | 0.3921 | HapMap             | Y                       | Y                             |                                                                                                                                                   |
| p55963                | rs7134858           | 125293557                   | Intron 6             |                   | C/T                 | 0.189  | 97.6       | 0.1560 | HapMap             | Y                       | Y                             |                                                                                                                                                   |
| p56845                | rs838902            | 125292675                   | Intron 6             |                   | A/G                 | 0.2799 | 97.2       | 0.4249 | SEQ                | Y                       | Y                             |                                                                                                                                                   |
| p57004                | rs187562853         | 125292516                   | Intron 6             |                   | G/A                 | 1      | 97         | 0.0098 | SEQ                | Y                       | Y                             |                                                                                                                                                   |
| p57107                | rs5892              | 125292413                   | Exon 7               | Phe301Phe         | C/T                 | 0.4893 | 97         | 0.0589 | SEQ                | Y                       | Y                             |                                                                                                                                                   |
| p57508                | rs71458866          | 125292012                   | Intron 7             |                   | G/A                 | 0.3467 | 98.9       | 0.1130 | SEQ                | Y                       | Y                             |                                                                                                                                                   |
| p57592                | rs838903            | 125291928                   | Intron 7             |                   | G/A                 | 0.3215 | 97         | 0.3763 | SEQ                | Y                       | Y                             |                                                                                                                                                   |
| p58514                | rs838905            | 125291006                   | Intron 7             |                   | T/C                 | 0.2442 | 97.3       | 0.4329 | HapMap             | Y                       | Y                             |                                                                                                                                                   |
| p58664                | rs865716            | 125290856                   | Intron 7             |                   | A/T                 | 0.1006 | 94.7       | 0.2708 | HapMap             | Y                       | Y                             |                                                                                                                                                   |
| p60255                | rs3782287           | 125289265                   | Intron 7             |                   | C/T                 | 0.4661 | 97.7       | 0.2831 | Literature         | Y                       | Y                             |                                                                                                                                                   |
| p61872                | rs838909            | 125287648                   | Intron 7             |                   | C/T                 | 0.9762 | 95.8       | 0.2199 | HapMap             | Y                       | Y                             |                                                                                                                                                   |
| p62140                | rs838910            | 125287380                   | Intron 7             |                   | G/T                 | 0.7286 | 95.2       | 0.3047 | HapMap             | Y                       | Y                             |                                                                                                                                                   |
| p62409                | rs838911            | 125287111                   | Intron 7             |                   | C/T                 | 0.5513 | 94.9       | 0.4211 | HapMap             | Y                       | Y                             |                                                                                                                                                   |
| p62615                | rs7138386           | 125286905                   | Intron 7             |                   | T/C                 | 0.4533 | 93.8       | 0.1137 | HapMap             | Y                       | Y                             |                                                                                                                                                   |
| p63483                | rs838912            | 125286037                   | Intron 7             |                   | G/A                 | 1      | 97.3       | 0.0867 | HapMap             | Y                       | Y                             |                                                                                                                                                   |
| p64772                | rs5888              | 125284748                   | Exon 8               | Ala350Ala         | C/T                 | 0.823  | 97.7       | 0.0961 | SEQ                | Y                       | Y                             |                                                                                                                                                   |
| p64923                | rs838915            | 125284597                   | Intron 8             |                   | C/A                 | 0.3967 | 96.8       | 0.1435 | SEQ                | Y                       | Y                             |                                                                                                                                                   |
| p65999                | rs12819677          | 125283521                   | Intron 8             |                   | G/A                 | 0.2879 | 95.4       | 0.2813 | HapMap             | Y                       | Y                             |                                                                                                                                                   |
| p67439                | rs961170            | 125282081                   | Intron 8             |                   | G/A                 | 0.0532 | 95.2       | 0.0893 | HapMap             | Y                       | Y                             |                                                                                                                                                   |
| p67700                | rs1726374           | 125281820                   | Intron 8             |                   | G/A                 | 0.2011 | 98.5       | 0.1933 | HapMap             | Y                       | Y                             |                                                                                                                                                   |
| p69013                | rs7135117           | 125280507                   | Intron 8             |                   | A/G                 | 0.0258 | 94.9       | 0.2901 | HapMap             | Y                       | Y                             |                                                                                                                                                   |
| p69699                | rs10396210          | 125279821                   | Intron 8-splice site |                   | G/A                 | 1      | 94.9       | 0.1511 | SEQ                | Y                       | Y                             |                                                                                                                                                   |
| p69995delC            | rs5801571           | 125279525                   | Intron 9             |                   | [C/-]               | 0.2836 | 96.1       | 0.2761 | SEQ                | Y                       | Y                             |                                                                                                                                                   |
| p70201                |                     | 125279319                   | Intron 9             |                   | T/C                 | 1      | 97.1       | 0.0010 | SEQ                | Y                       | Y-only in SKAT-O              | Found in one subject with an outlier HDL-C value (above mean + 3.5 SD), then excluded from other analyses, except for SKAT-O test (see Figure 1). |
| p71867                | rs7954022           | 125277653                   | Intron 9             |                   | C/T                 | 0.8535 | 95.9       | 0.1323 | HapMap             | Y                       | Y                             |                                                                                                                                                   |
| p72197                | rs838861            | 125277323                   | Intron 9             |                   | A/G                 | 0.0045 | 95.4       | 0.3777 | HapMap             | Y                       | Y                             |                                                                                                                                                   |
| p72777                | rs838862            | 125276743                   | Intron 9             |                   | C/T                 | 0.7348 | 95.2       | 0.0887 | HapMap             | Y                       | Y                             |                                                                                                                                                   |

| SNP Name <sup>a</sup> | SNP ID <sup>b</sup> | Chr12 Position <sup>c</sup> | Location       | Amino acid Change    | Major/Minor Alleles | HWE <i>P</i> | %Call Rate | MAF    | Source of Variants | Success in GT (n = 138) | Proceed to Analyses (n = 137) | Note                                 |
|-----------------------|---------------------|-----------------------------|----------------|----------------------|---------------------|--------------|------------|--------|--------------------|-------------------------|-------------------------------|--------------------------------------|
| p75766                | rs838866            | 125273754                   | Intron 9       |                      | T/C                 | 0.4407       | 96.6       | 0.2116 | HapMap             | Y                       | Y                             |                                      |
| p75778                | rs7301120           | 125273742                   | Intron 9       |                      | C/T                 | 1            | 93.9       | 0.1135 | HapMap             | Y                       | Y                             |                                      |
| p76204                | rs866793            | 125273316                   | Intron 9       |                      | A/G                 | 1.66E-18     | 92.9       | 0.0520 | HapMap             | Y                       | N                             | Excluded due to a deviation from HWE |
| p76757                | rs9919713           | 125272763                   | Intron 9       |                      | A/T                 | 0.252        | 96.7       | 0.4390 | HapMap             | Y                       | Y                             |                                      |
| p77181                | rs146246031         | 125272339                   | Intron 9       |                      | T/C                 | 1            | 96.2       | 0.0053 | SEQ                | Y                       | Y                             |                                      |
| p77251                | rs34339961          | 125272269                   | Intron 9       |                      | A/T                 | 0.9341       | 95.4       | 0.1177 | SEQ                | Y                       | Y                             |                                      |
| p77381                | rs138499966         | 125272139                   | Intron 9       |                      | T/C                 | 1            | 97         | 0.0046 | SEQ                | Y                       | Y                             |                                      |
| p77620                | rs377124254         | 125271900                   | Intron 10      |                      | G/A                 | 1            | 96.2       | 0.0007 | SEQ                | Y                       | Y                             |                                      |
| p77682                | rs150082885         | 125271838                   | Intron 10      |                      | A/G                 | 0.1549       | 95.4       | 0.0106 | SEQ                | Y                       | Y                             |                                      |
| p77704                |                     | 125271816                   | Intron 10      |                      | C/A                 | 1            | 95.6       | 0.0040 | SEQ                | Y                       | Y                             |                                      |
| p77842                | rs2272310           | 125271678                   | Intron 10      |                      | G/A                 | 1            | 98.2       | 0.0807 | SEQ                | Y                       | Y                             |                                      |
| p78255                | rs184052375         | 125271265                   | Intron 10      |                      | A/G                 | 1            | 97.1       | 0.0072 | SEQ                | Y                       | Y                             |                                      |
| p78402                | rs838898            | 125271118                   | Intron 10      |                      | G/A                 | 0.1137       | 89.7       | 0.0714 | SEQ                | Y                       | Y                             |                                      |
| p78430                | rs838897            | 125271090                   | Intron 10      |                      | C/G                 | 0.0119       | 95.4       | 0.3830 | SEQ                | Y                       | Y                             |                                      |
| p78747                | rs2293440           | 125270773                   | Intron 11      |                      | T/C                 | 0.5489       | 95.1       | 0.4112 | SEQ                | Y                       | Y                             |                                      |
| p78791                | rs75289200          | 125270729                   | Intron 11      |                      | T/C                 | 0.9169       | 94.8       | 0.0321 | SEQ                | Y                       | Y                             |                                      |
| p79721                | rs838896            | 125269799                   | Intron 11      |                      | G/C                 | 0.9259       | 97.7       | 0.3104 | HapMap             | Y                       | Y                             |                                      |
| p79828                | rs838895            | 125269692                   | Intron 11      |                      | C/G                 | 0.8944       | 96.4       | 0.3171 | Literature         | Y                       | Y                             |                                      |
| p80045                | rs838893            | 125269475                   | Intron 11      |                      | G/A                 | 0.9108       | 97.6       | 0.3244 | HapMap             | Y                       | Y                             |                                      |
| p81863                | rs185445624         | 125267657                   | Intron 11      |                      | G/A                 | 1            | 97         | 0.0020 | SEQ                | Y                       | Y                             |                                      |
| p82019                | rs838890            | 125267501                   | Intron 11      |                      | C/T                 | 0.343        | 95.1       | 0.0320 | SEQ                | Y                       | Y                             |                                      |
| p82264                | rs141545424         | 125267256                   | Exon 12        | Gly501Gly            | C/A                 | 1            | 96.7       | 0.0007 | SEQ                | Y                       | Y                             |                                      |
| p82340                | rs77483223          | 125267180                   | Intron 12      |                      | G/A                 | 1            | 95.9       | 0.0231 | SEQ                | Y                       | Y                             |                                      |
| p82369                | rs75446635          | 125267151                   | Intron 12      |                      | G/A                 | 1            | 97         | 0.0059 | SEQ                | Y                       | Y                             |                                      |
| p82434                | rs838889            | 125267086                   | Intron 12      |                      | T/C                 | 0.3344       | 96.6       | 0.0315 | SEQ                | Y                       | Y                             |                                      |
| p83547                | rs838887            | 125265973                   | Intron 12      |                      | C/G                 | 0.5641       | 96.1       | 0.4564 | HapMap             | Y                       | Y                             |                                      |
| p83884                | rs701106            | 125265636                   | Intron 12      |                      | C/T                 | 0.9346       | 98         | 0.2597 | HapMap             | Y                       | Y                             |                                      |
| p86245                | rs188375019         | 125263275                   | Intron 12      |                      | C/T                 | 0.8126       | 96.7       | 0.0341 | SEQ                | Y                       | Y                             |                                      |
| p86276                | rs747155            | 125263244                   | Intron 12      |                      | C/T                 | 0.8803       | 97.2       | 0.1495 | SEQ                | Y                       | Y                             |                                      |
| p86316                | rs701104            | 125263204                   | Intron 12      |                      | G/T                 | 1            | 93.8       | 0.0487 | SEQ                | Y                       | Y                             |                                      |
| p86481                | rs701103            | 125263039                   | Exon 13-3' UTR | Gly499Arg (isoform2) | G/A                 | 0.3376       | 96.6       | 0.2451 | SEQ                | Y                       | Y                             |                                      |
| p86967                | rs187492239         | 125262553                   | Exon 13-3' UTR |                      | A/G                 | 0.7536       | 96.4       | 0.0355 | SEQ                | Y                       | Y                             |                                      |
| p87011                | rs58032386          | 125262509                   | Exon 13-3' UTR |                      | C/T                 | 0.8106       | 97.6       | 0.1417 | SEQ                | Y                       | Y                             |                                      |
| p87266                | rs150512235         | 125262254                   | Exon 13-       |                      | T/C                 | 1            | 99.4       | 0.0057 | SEQ                | Y                       | Y                             |                                      |

| SNP Name <sup>a</sup> | SNP ID <sup>b</sup> | Chr12 Position <sup>c</sup> | Location<br>3' UTR <sup>d</sup> | Amino acid Change | Major/Minor Alleles | HWE <i>P</i> | %Call Rate | MAF    | Source of Variants | Success in GT (n = 138) | Proceed to Analyses (n = 137) | Note |
|-----------------------|---------------------|-----------------------------|---------------------------------|-------------------|---------------------|--------------|------------|--------|--------------------|-------------------------|-------------------------------|------|
| p87611                | rs190688220         | 125261909                   | 3' flanking                     |                   | C/T                 | 0.9286       | 96.3       | 0.0316 | SEQ                | Y                       | Y                             |      |
| p87681                | rs838883            | 125261839                   | 3' flanking                     |                   | G/A                 | 1            | 93.9       | 0.0459 | SEQ                | Y                       | Y                             |      |
| p87694                |                     | 125261826                   | 3' flanking                     |                   | C/T                 | 1            | 95.4       | 0.0020 | SEQ                | Y                       | Y                             |      |
| p87723                | rs838881            | 125261797                   | 3' flanking                     |                   | C/T                 | 0.0678       | 97.1       | 0.3183 | SEQ                | Y                       | Y                             |      |
| p87749                | rs76465225          | 125261771                   | 3' flanking                     |                   | G/A                 | 0.5802       | 97         | 0.0844 | SEQ                | Y                       | Y                             |      |
| p87927                | rs838880            | 125261593                   | 3' flanking                     |                   | G/A                 | 0.5951       | 96.4       | 0.2414 | SEQ                | Y                       | Y                             |      |

del, deletion; GT, genotyping; HDL-C, high-density lipoprotein cholesterol; HWE, Hardy-Weinberg equilibrium; ins, insertion; MAF, minor allele frequency; Literature, variants selected from the literature; SD, standard deviation; SEQ, sequencing; SKAT-O, an optimal sequence kernel association test; SNP, single nucleotide polymorphism; UTR, untranslated region. N, no; Y, yes.

All alleles on the reverse strand. Splice site is defined as  $\pm 20$  bp from the start or end of an exon.

All 10 novel variants identified in this study have been submitted to dbSNP database (batch ID: SCARB1\_AB); [http://www.ncbi.nlm.nih.gov/SNP/snp\\_viewTable.cgi?handle=KAMBOH](http://www.ncbi.nlm.nih.gov/SNP/snp_viewTable.cgi?handle=KAMBOH).

A total of 137 genotyped variants (68 variants identified by sequencing, 67 common HapMap-YRI tagSNPs, and 2 additional associated variants from the literatures) that passed genotyping quality controls were included in the downstream analyses.

An LD plot of 137 genotyped variants that passed genotyping quality controls and were included in the downstream analyses is shown in Additional file 11 Figure S4.

A list of 87 genotyped common tagSNPs (MAF  $\geq 5\%$ ) identified by Tagger analysis using an  $r^2$  cut-off of 0.90 is shown in Additional file 10 Table S7.

<sup>a, c</sup> RefSeq of *SCARB1*: hg19, NM\_005505 (CHIP Bioinformatics).

<sup>b</sup> dbSNP build 139: GRCh37.p10.

<sup>d</sup> Close to a miRNA-145 seed site based on TargetScanHuman (version 6.2, <http://www.targetscan.org/>).
