# Supplementary material for: Genetic contribution of SCARB1 variants to lipid traits in African Blacks: a candidate gene association study
Source: PubMed Central journal article supplement (PMC4643515; doi:10.1186/s12881-015-0250-6), 2015-11-12
Supplement: 12881_2015_250_MOESM14_ESM.pdf [file 12881_2015_250_MOESM14_ESM.pdf]

**Table S9. Single-site association results for 136 SCARB1 genotyped variants with HDL-C.**

| SNP Name <sup>a</sup>          | SNP ID <sup>b</sup> | Chr12 Position <sup>c</sup> | Location | Amino Acid Change | RegDB Score <sup>d</sup> | MA, MAF   | Genotype | Genotype Count | Adjusted Mean (mg/dL) | SD (mg/dL)        | $\beta$ | SE     | P             | FDR <sup>e</sup> |
|--------------------------------|---------------------|-----------------------------|----------|-------------------|--------------------------|-----------|----------|----------------|-----------------------|-------------------|---------|--------|---------------|------------------|
| <b>MAF <math>\geq</math>5%</b> |                     |                             |          |                   |                          |           |          |                |                       |                   |         |        |               |                  |
| p1265                          | rs2070242           | 125348255                   | Exon 1   | Ser4Ser           | 2b                       | T, 0.1284 | CC/CT/TT | 541/163/10     | 48.38/46.08/49.75     | 12.44/13.11/12.75 | -0.5040 | 0.2906 | 0.0833        | 0.4530           |
| p4072                          | rs7139401           | 125345448                   | Intron 1 |                   | 3b                       | C, 0.4386 | TT/TC/CC | 232/343/147    | 47.46/48.27/47.73     | 13.65/12.32/11.97 | 0.0877  | 0.1905 | 0.6453        | 0.8199           |
| p5055                          | rs11057869          | 125344465                   | Intron 1 |                   | 7                        | A, 0.0740 | AA/GA/GG | 7/96/638       | 45.72/48.5/47.75      | 12.97/12.78/12.69 | 0.0976  | 0.3538 | 0.7828        | 0.9022           |
| p6600                          | rs12831105          | 125342920                   | Intron 1 |                   | 7                        | T, 0.1188 | CC/CT/TT | 566/151/11     | 47.51/49.2/47.82      | 12.24/14.20/12.34 | 0.3570  | 0.2933 | 0.2239        | 0.6829           |
| p10292                         | rs4765181           | 125339228                   | Intron 1 |                   | 5                        | T, 0.2490 | TT/GT/GG | 44/285/417     | 46.42/48.72/47.39     | 12.15/12.86/12.52 | 0.1348  | 0.2201 | 0.5405        | 0.8199           |
| p10991                         | rs10773112          | 125338529                   | Intron 1 |                   | 4                        | A, 0.3534 | GG/GA/AA | 303/341/89     | 47.35/48.09/48.59     | 13.39/12.02/12.81 | 0.2146  | 0.2010 | 0.2860        | 0.6833           |
| p13570                         | rs11057864          | 125335950                   | Intron 1 |                   | 4                        | T, 0.1180 | TT/GT/GG | 14/147/581     | 49.3/47.24/47.89      | 9.25/11.91/12.98  | -0.0393 | 0.2886 | 0.8917        | 0.9622           |
| p16565                         | rs10773111          | 125332955                   | Intron 1 |                   | 6                        | A, 0.1928 | GG/GA/AA | 481/239/24     | 47.65/48.23/47.55     | 12.70/12.62/13.49 | 0.1089  | 0.2436 | 0.6550        | 0.8199           |
| p20207                         | rs11057853          | 125329313                   | Intron 1 |                   | 5                        | A, 0.4484 | AA/GA/GG | 150/360/228    | 48.27/48.84/45.85     | 12.70/13.23/11.74 | 0.4082  | 0.1925 | <b>0.0343</b> | 0.4235           |
| p20694                         | rs11057852          | 125328826                   | Intron 1 |                   | 7                        | A, 0.1050 | GG/GA/AA | 581/130/11     | 48.04/47.5/49.33      | 12.91/11.75/9.83  | -0.0308 | 0.3061 | 0.9198        | 0.9622           |
| p20741                         | rs11057851          | 125328779                   | Intron 1 |                   | 5                        | T, 0.3237 | TT/CT/CC | 72/334/328     | 43.9/47.68/48.86      | 11.05/13.00/12.57 | -0.5924 | 0.2067 | <b>0.0043</b> | <b>0.1465</b>    |
| p21145                         | rs3924313           | 125328375                   | Intron 1 |                   | 6                        | T, 0.1772 | CC/CT/TT | 503/219/22     | 47.6/48.13/48.4       | 12.50/13.00/9.98  | 0.1488  | 0.2489 | 0.5502        | 0.8199           |
| p22116                         | rs12370382          | 125327404                   | Intron 1 |                   | 1f                       | A, 0.0645 | GG/GA/AA | 643/86/3       | 47.57/49.06/35.39     | 12.67/13.28/6.62  | 0.1369  | 0.3965 | 0.7300        | 0.8709           |
| p22168                         | rs7137797           | 125327352                   | Intron 1 |                   | 2b                       | C, 0.3977 | CC/TC/TT | 113/355/259    | 48.48/48.04/47.1      | 13.14/12.49/12.77 | 0.2153  | 0.1976 | 0.2763        | 0.6833           |
| p22331                         | rs6488944           | 125327189                   | Intron 1 |                   | 4                        | G, 0.1474 | TT/TG/GG | 522/188/12     | 47.54/48.91/47.47     | 12.66/12.99/12.80 | 0.3091  | 0.2778 | 0.2661        | 0.6829           |
| p22675                         | rs12425134          | 125326845                   | Intron 1 |                   | 4                        | T, 0.0526 | TT/GT/GG | 2/75/662       | 54.65/49.92/47.6      | 4.88/11.66/12.79  | 0.7556  | 0.4221 | 0.0738        | 0.4530           |
| p28137                         | rs12229555          | 125321383                   | Intron 1 |                   | 7                        | G, 0.3896 | GG/AG/AA | 99/373/257     | 46.88/47.29/49.16     | 12.96/12.60/12.64 | -0.3976 | 0.2025 | 0.0500        | 0.4473           |
| p28692                         | rs4765622           | 125320828                   | Intron 1 |                   | 5                        | T, 0.2565 | TT/CT/CC | 43/289/403     | 47.61/48.48/47.36     | 13.61/12.50/12.84 | 0.1962  | 0.2242 | 0.3817        | 0.7635           |
| p28957                         | rs11057844          | 125320563                   | Intron 1 |                   | 5                        | A, 0.2362 | GG/GA/AA | 428/263/40     | 47.34/47.87/50.96     | 13.11/12.40/10.13 | 0.3671  | 0.2278 | 0.1075        | 0.5151           |
| p29749                         | rs10846751          | 125319771                   | Intron 1 |                   | 7                        | T, 0.4492 | TT/CT/CC | 142/365/210    | 46.42/47.81/48.73     | 13.57/12.59/12.27 | -0.3558 | 0.1961 | 0.0701        | 0.4530           |
| p31072                         | rs10846749          | 125318448                   | Intron 1 |                   | 4                        | G, 0.4461 | CC/CG/GG | 222/366/144    | 48.83/47.61/46.39     | 12.22/12.86/13.04 | -0.3792 | 0.1940 | 0.0510        | 0.4473           |
| p31938                         | rs10744182          | 125317582                   | Intron 1 |                   | 5                        | A, 0.1837 | AA/GA/GG | 25/221/487     | 45.31/47.42/47.94     | 16.27/13.13/12.29 | -0.2885 | 0.2474 | 0.2438        | 0.6829           |
| p32129                         | rs10773107          | 125317391                   | Intron 1 |                   | 7                        | T, 0.1009 | TT/GT/GG | 9/132/593      | 47/46.79/48.03        | 8.10/12.92/12.72  | -0.3186 | 0.3141 | 0.3107        | 0.6927           |
| p32273                         | rs12580803          | 125317247                   | Intron 1 |                   | 5                        | C, 0.1006 | TT/TC/CC | 619/114/18     | 47.7/47.52/51.35      | 12.85/11.79/13.59 | 0.2010  | 0.2968 | 0.4984        | 0.8199           |
| p32290                         | rs10744181          | 125317230                   | Intron 1 |                   | 5                        | C, 0.1238 | TT/TC/CC | 547/141/18     | 47.89/48.46/42.63     | 12.60/13.86/9.02  | -0.1852 | 0.2851 | 0.5162        | 0.8199           |
| p32395                         | rs12581963          | 125317125                   | Intron 1 |                   | 5                        | T, 0.1314 | TT/CT/CC | 11/179/557     | 47.47/46.69/48.1      | 8.81/11.70/12.94  | -0.3173 | 0.2808 | 0.2589        | 0.6829           |

|                |             |           |          |           |              |           |             |                   |                   |                |        |               |        |        |
|----------------|-------------|-----------|----------|-----------|--------------|-----------|-------------|-------------------|-------------------|----------------|--------|---------------|--------|--------|
| p32750         | rs7967521   | 125316770 | Intron 1 | 7         | G, 0.3425    | GG/AG/AA  | 89/306/310  | 45.26/48.42/47.89 | 11.20/12.62/13.26 | -0.2137        | 0.2034 | 0.2936        | 0.6833 |        |
| p32777         | rs11057841  | 125316743 | Intron 1 | 7         | A, 0.2805    | GG/GA/AA  | 367/307/50  | 47.82/48.49/44.86 | 12.82/12.79/10.19 | -0.1217        | 0.2187 | 0.5781        | 0.8199 |        |
| p32860         | rs7967406   | 125316660 | Intron 1 | 6         | C, 0.0991    | CC/AC/AA  | 9/131/608   | 46.8/48.71/47.54  | 8.12/12.43/12.81  | 0.2647         | 0.3141 | 0.3996        | 0.7876 |        |
| p33531         | rs11057838  | 125315989 | Intron 1 | 7         | A, 0.2278    | CC/CA/AA  | 439/254/41  | 48.09/47.82/45.51 | 12.94/12.64/10.74 | -0.2064        | 0.2258 | 0.3609        | 0.7635 |        |
| p36094         | rs11608336  | 125313426 | Intron 1 | 4         | A, 0.1543    | GG/GA/AA  | 521/195/15  | 47.49/48.96/48.39 | 12.47/13.43/10.99 | 0.3354         | 0.2678 | 0.2108        | 0.6829 |        |
| p36461         | rs4765178   | 125313059 | Intron 1 | 4         | T, 0.1671    | TT/CT/CC  | 19/201/496  | 47.45/47.5/48.12  | 10.94/12.52/12.99 | -0.1369        | 0.2628 | 0.6024        | 0.8199 |        |
| p36908         | rs10846745  | 125312612 | Intron 1 | 4         | G, 0.3257    | GG/CG/CC  | 76/334/329  | 44.67/49.15/47.23 | 10.95/13.05/12.30 | -0.0384        | 0.2045 | 0.8511        | 0.9488 |        |
| p37095         | rs10846744  | 125312425 | Intron 1 | 4         | G, 0.3056    | CC/CG/GG  | 348/340/57  | 47.72/47.75/48.9  | 13.10/11.99/13.09 | 0.1168         | 0.2125 | 0.5829        | 0.8199 |        |
| p41632         | rs6488943   | 125307888 | Intron 1 | 5         | C, 0.2954    | CC/AC/AA  | 50/309/337  | 45.63/48.2/48.34  | 9.68/13.16/12.65  | -0.2195        | 0.2226 | 0.3244        | 0.7041 |        |
| p42467         | rs11057830  | 125307053 | Intron 1 | 7         | T, 0.1523    | TT/CT/CC  | 13/201/523  | 40.37/48.03/47.91 | 15.96/13.41/12.33 | -0.2810        | 0.2718 | 0.3015        | 0.6833 |        |
| p45516         | rs1902569   | 125304004 | Intron 1 | 5         | A, 0.1544    | AA/GA/GG  | 18/190/519  | 49.5/49.31/47.28  | 12.57/11.81/12.95 | 0.5447         | 0.2629 | <b>0.0386</b> | 0.4375 |        |
| p48969         | rs2343394   | 125300551 | Intron 2 | 5         | T, 0.1898    | TT/CT/CC  | 32/225/491  | 47.56/48.89/47.23 | 11.15/12.64/12.73 | 0.3165         | 0.2352 | 0.1788        | 0.6236 |        |
| p49537         | rs7305310   | 125299983 | Intron 2 | 5         | T, 0.1007    | CC/CT/TT  | 595/117/16  | 48.06/47.04/45.04 | 12.87/12.58/9.83  | -0.3396        | 0.2991 | 0.2566        | 0.6829 |        |
| p49570<br>delC | rs145376237 | 125299950 | Intron 2 | 5         | delC, 0.2276 | DD/WD/WW  | 36/260/432  | 44.33/49.8/46.89  | 11.46/13.26/12.43 | 0.3121         | 0.2311 | 0.1773        | 0.6236 |        |
| p49690         | rs4765615   | 125299830 | Intron 2 | 5         | A, 0.4426    | AA/GA/GG  | 156/318/244 | 45.87/48/49.03    | 13.19/12.44/13.01 | -0.4646        | 0.1866 | <b>0.0130</b> | 0.2526 |        |
| p50151         | rs2278986   | 125299369 | Intron 3 | 5         | C, 0.1933    | CC/TC/TT  | 33/225/484  | 49.64/48.72/47.21 | 11.26/12.41/12.86 | 0.4333         | 0.2350 | 0.0656        | 0.4530 |        |
| p51888         | rs7138304   | 125297632 | Intron 4 | 2b        | T, 0.1079    | TT/CT/CC  | 16/129/589  | 45.08/48.13/47.83 | 9.22/12.36/12.75  | -0.0610        | 0.2898 | 0.8334        | 0.9367 |        |
| p52096         | rs10846739  | 125297424 | Intron 4 | 3a        | G, 0.4693    | GG/AG/AA  | 169/343/217 | 46.18/49.5/46.33  | 13.08/12.63/12.17 | 0.0195         | 0.1868 | 0.9168        | 0.9622 |        |
| p52556         | rs11057820  | 125296964 | Intron 4 | 5         | A, 0.1000    | AA/GA/GG  | 12/124/610  | 40.36/48.71/47.69 | 11.34/13.80/12.49 | -0.1513        | 0.3081 | 0.6235        | 0.8199 |        |
| p52610         | rs10846738  | 125296910 | Intron 4 | 4         | T, 0.1349    | TT/CT/CC  | 12/172/545  | 46.62/48.16/47.93 | 12.58/13.45/12.36 | -0.0102        | 0.2804 | 0.9710        | 0.9848 |        |
| p52956         | rs77740046  | 125296564 | Intron 4 | 5         | T, 0.0546    | CC/CT/TT  | 651/75/3    | 47.69/48.97/46.21 | 12.89/11.66/13.34 | 0.3300         | 0.4168 | 0.4288        | 0.8025 |        |
| p53359         | rs112371713 | 125296161 | Intron 5 | 5         | A, 0.1243    | AA/GA/GG  | 9/160/549   | 44.06/49.59/47.4  | 13.40/12.95/12.69 | 0.4193         | 0.3018 | 0.1651        | 0.6236 |        |
| p53790         | rs4765614   | 125295730 | Intron 5 | 5         | A, 0.2653    | GG/GA/AA  | 399/276/58  | 48.17/48.05/44.21 | 13.17/12.42/10.42 | -0.3281        | 0.2118 | 0.1218        | 0.5370 |        |
| p54492         | rs61762481  | 125295028 | Intron 5 | 4         | A, 0.1005    | AA/GA/GG  | 8/137/607   | 47.58/47.31/47.92 | 8.15/12.76/12.74  | -0.1522        | 0.3119 | 0.6257        | 0.8199 |        |
| p55923         | rs838900    | 125293597 | Intron 6 | 7         | A, 0.3921    | AA/GA/GG  | 113/345/275 | 47.05/49.45/46.18 | 13.85/13.31/11.20 | 0.2787         | 0.1957 | 0.1549        | 0.6194 |        |
| p55963         | rs7134858   | 125293557 | Intron 6 | 6         | T, 0.1560    | TT/CT/CC  | 24/184/532  | 50.7/48.34/47.23  | 7.08/11.91/12.90  | 0.4418         | 0.2520 | 0.0799        | 0.4530 |        |
| p56845         | rs838902    | 125292675 | Intron 6 | 5         | G, 0.4249    | AA/AG/GG  | 249/347/141 | 48.01/47.88/47.42 | 12.84/12.60/12.79 | -0.0786        | 0.1905 | 0.6801        | 0.8343 |        |
| p57107         | rs5892      | 125292413 | Exon 7   | Phe301Phe | 4            | T, 0.0589 | CC/CT/TT    | 656/85/1          | 47.84/47.53/54.22 | 12.92/11.23/NA | 0.0079 | 0.4138        | 0.9848 | 0.9848 |
| p57508         | rs71458866  | 125292012 | Intron 7 | 4         | A, 0.1130    | AA/GA/GG  | 13/144/594  | 47.5/47.11/47.93  | 9.18/12.92/12.68  | -0.1926        | 0.2914 | 0.5089        | 0.8199 |        |
| p57592         | rs838903    | 125291928 | Intron 7 | 4         | A, 0.3763    | AA/GA/GG  | 111/334/290 | 47.18/47.64/48.29 | 11.62/13.06/12.86 | -0.1598        | 0.1959 | 0.4149        | 0.8025 |        |
| p58514         | rs838905    | 125291006 | Intron 7 | 4         | C, 0.4329    | CC/TC/TT  | 146/350/243 | 47.34/47.97/48.02 | 12.68/12.56/13.04 | -0.0855        | 0.1905 | 0.6536        | 0.8199 |        |

|        |            |           |           |             |    |              |          |             |                   |                   |         |        |               |        |
|--------|------------|-----------|-----------|-------------|----|--------------|----------|-------------|-------------------|-------------------|---------|--------|---------------|--------|
| p58664 | rs865716   | 125290856 | Intron 7  |             | 5  | T, 0.2708    | AA/AT/TT | 395/268/62  | 48.35/46.87/49.05 | 13.05/12.47/10.76 | -0.0965 | 0.2094 | 0.6449        | 0.8199 |
| p60255 | rs3782287  | 125289265 | Intron 7  |             | 5  | T, 0.2831    | CC/CT/TT | 378/312/51  | 46.89/48.96/46.64 | 12.02/13.23/14.24 | 0.2555  | 0.2197 | 0.2453        | 0.6829 |
| p61872 | rs838909   | 125287648 | Intron 7  |             | 4  | T, 0.2199    | CC/CT/TT | 449/249/36  | 47.59/48.12/48.15 | 12.60/13.16/10.94 | 0.1223  | 0.2297 | 0.5945        | 0.8199 |
| p62140 | rs838910   | 125287380 | Intron 7  |             | 5  | T, 0.3047    | GG/GT/TT | 355/304/70  | 47.6/48.51/45.61  | 12.61/12.92/12.07 | -0.0759 | 0.2071 | 0.7143        | 0.8597 |
| p62409 | rs838911   | 125287111 | Intron 7  |             | 5  | T, 0.4211    | CC/CT/TT | 247/347/133 | 48.21/48.12/46.87 | 13.10/12.87/11.68 | -0.1556 | 0.1934 | 0.4213        | 0.8025 |
| p62615 | rs7138386  | 125286905 | Intron 7  |             | 5  | C, 0.1137    | TT/TC/CC | 568/138/12  | 48.18/46.68/50.88 | 12.66/12.76/9.42  | -0.2083 | 0.2982 | 0.4851        | 0.8199 |
| p63483 | rs838912   | 125286037 | Intron 7  |             | 7  | A, 0.0867    | AA/GA/GG | 6/117/615   | 47.88/48.51/47.79 | 8.05/12.85/12.52  | 0.1814  | 0.3311 | 0.5840        | 0.8199 |
| p64772 | rs5888     | 125284748 | Exon 8    | Ala350Ala   | 3a | T, 0.0961    | CC/CT/TT | 605/129/8   | 47.6/48.54/52.11  | 12.65/13.16/10.27 | 0.3620  | 0.3186 | 0.2561        | 0.6829 |
| p64923 | rs838915   | 125284597 | Intron 8  |             | 5  | A, 0.1435    | AA/CA/CC | 19/177/539  | 45.25/48.03/47.87 | 9.15/12.97/12.72  | -0.0858 | 0.2654 | 0.7466        | 0.8829 |
| p65999 | rs12819677 | 125283521 | Intron 8  |             | 6  | A, 0.2813    | GG/GA/AA | 371/310/50  | 46.78/49.09/47.82 | 12.14/13.01/13.90 | 0.4021  | 0.2192 | 0.0670        | 0.4530 |
| p67439 | rs961170   | 125282081 | Intron 8  |             | 4  | A, 0.0893    | AA/GA/GG | 11/108/610  | 45.83/48.01/47.82 | 17.60/12.30/12.70 | -0.0481 | 0.3220 | 0.8812        | 0.9622 |
| p67700 | rs1726374  | 125281820 | Intron 8  |             | 7  | A, 0.1933    | GG/GA/AA | 491/221/35  | 47.61/47.44/51.33 | 12.81/12.01/14.89 | 0.2289  | 0.2330 | 0.3262        | 0.7041 |
| p69013 | rs7135117  | 125280507 | Intron 8  |             | 7  | G, 0.2901    | GG/AG/AA | 75/275/377  | 48.2/48.1/47.63   | 12.45/12.42/13.01 | 0.1133  | 0.2024 | 0.5758        | 0.8199 |
| p69699 | rs10396210 | 125279821 | Intron 8  | splice site | 4  | A, 0.1511    | AA/GA/GG | 17/186/523  | 46.35/46.27/48.29 | 10.51/11.82/13.06 | -0.4778 | 0.2675 | 0.0745        | 0.4530 |
| p69995 | rs5801571  | 125279525 | Intron 9  |             | 5  | delC, 0.2761 | DD/WD/WW | 63/281/386  | 47.7/47.72/47.45  | 13.42/12.34/13.04 | 0.0614  | 0.2123 | 0.7724        | 0.8978 |
| p71867 | rs7954022  | 125277653 | Intron 9  |             | 5  | T, 0.1323    | TT/CT/CC | 11/172/552  | 45/49.47/47.43    | 12.10/12.93/12.59 | 0.3876  | 0.2864 | 0.1764        | 0.6236 |
| p72197 | rs838861   | 125277323 | Intron 9  |             | 7  | G, 0.3777    | AA/AG/GG | 300/308/123 | 48.56/47.21/47.97 | 13.20/12.13/13.06 | -0.1415 | 0.1883 | 0.4527        | 0.8101 |
| p72777 | rs838862   | 125276743 | Intron 9  |             | 5  | T, 0.0887    | CC/CT/TT | 607/115/7   | 47.9/47.97/51.52  | 12.46/13.53/18.41 | 0.1013  | 0.3334 | 0.7613        | 0.8925 |
| p75766 | rs838866   | 125273754 | Intron 9  |             | 6  | C, 0.2116    | TT/TC/CC | 457/239/38  | 48.02/47.68/47.04 | 12.90/12.55/10.89 | -0.1058 | 0.2276 | 0.6423        | 0.8199 |
| p75778 | rs7301120  | 125273742 | Intron 9  |             | 6  | T, 0.1135    | TT/CT/CC | 9/147/563   | 50.67/46.79/48.17 | 7.48/12.53/12.82  | -0.2367 | 0.3041 | 0.4366        | 0.8025 |
| p76757 | rs9919713  | 125272763 | Intron 9  |             | 6  | T, 0.4390    | AA/AT/TT | 235/347/151 | 48.16/47.8/47.14  | 13.78/12.06/12.19 | -0.1264 | 0.1892 | 0.5044        | 0.8199 |
| p77251 | rs34339961 | 125272269 | Intron 9  |             | 6  | T, 0.1177    | AA/AT/TT | 561/151/11  | 47.91/46.76/50.68 | 12.87/12.10/8.13  | -0.1372 | 0.2955 | 0.6426        | 0.8199 |
| p77842 | rs2272310  | 125271678 | Intron 10 |             | 5  | A, 0.0807    | AA/GA/GG | 5/110/630   | 51.11/48.16/47.65 | 12.21/13.23/12.64 | 0.2011  | 0.3494 | 0.5651        | 0.8199 |
| p78402 | rs838898   | 125271118 | Intron 10 |             | 5  | A, 0.0714    | AA/GA/GG | 7/86/594    | 45.47/48/48.01    | 7.94/12.21/13.05  | -0.0602 | 0.3738 | 0.8720        | 0.9622 |
| p78430 | rs838897   | 125271090 | Intron 10 |             | 5  | G, 0.3830    | GG/CG/CC | 125/308/291 | 46.86/48.36/47.33 | 12.37/12.40/12.86 | 0.0070  | 0.1877 | 0.9704        | 0.9848 |
| p78747 | rs2293440  | 125270773 | Intron 11 |             | 5  | C, 0.4112    | CC/TC/TT | 128/342/252 | 46.7/47.72/48.12  | 10.50/12.59/13.48 | -0.1684 | 0.1919 | 0.3806        | 0.7635 |
| p79721 | rs838896   | 125269799 | Intron 11 |             | 5  | C, 0.3104    | GG/GC/CC | 349/319/73  | 47.39/47.6/50.86  | 13.07/12.12/12.38 | 0.3565  | 0.2045 | 0.0817        | 0.4530 |
| p79828 | rs838895   | 125269692 | Intron 11 |             | 5  | G, 0.3171    | GG/CG/CC | 74/322/337  | 50.65/48.22/46.95 | 12.74/12.27/13.10 | 0.4961  | 0.2059 | <b>0.0162</b> | 0.2756 |
| p80045 | rs838893   | 125269475 | Intron 11 |             | 5  | A, 0.3244    | GG/GA/AA | 335/325/81  | 47.17/48.1/49.33  | 12.98/12.45/12.54 | 0.3127  | 0.2022 | 0.1224        | 0.5370 |
| p83547 | rs838887   | 125265973 | Intron 12 |             | 5  | G, 0.4564    | CC/CG/GG | 225/357/154 | 46.99/48.49/47.62 | 12.57/12.51/13.34 | 0.1202  | 0.1898 | 0.5267        | 0.8199 |
| p83884 | rs701106   | 125265636 | Intron 12 |             | 5  | T, 0.2597    | TT/CT/CC | 49/289/405  | 50.45/47.79/47.56 | 13.58/12.76/12.53 | 0.2471  | 0.2192 | 0.2601        | 0.6829 |

|                              |             |           |                |                          |    |              |          |            |                   |                   |         |        |               |        |
|------------------------------|-------------|-----------|----------------|--------------------------|----|--------------|----------|------------|-------------------|-------------------|---------|--------|---------------|--------|
| p86276                       | rs747155    | 125263244 | Intron 12      | Gly499Arg<br>(isoform 2) | 2b | T, 0.1495    | TT/CT/CC | 17/187/533 | 48.37/48.5/47.47  | 13.90/11.86/12.96 | 0.2793  | 0.2681 | 0.2980        | 0.6833 |
| p86481                       | rs701103    | 125263039 | Exon 13-3' UTR |                          | 5  | A, 0.2451    | AA/GA/GG | 50/259/424 | 46.92/48.83/47.38 | 13.72/12.39/12.59 | 0.1642  | 0.2169 | 0.4492        | 0.8101 |
| p87011                       | rs58032386  | 125262509 | Exon 13-3' UTR |                          | 2a | T, 0.1417    | CC/CT/TT | 544/183/14 | 47.8/48.03/47.93  | 12.88/11.70/16.17 | 0.0575  | 0.2733 | 0.8333        | 0.9367 |
| p87723                       | rs838881    | 125261797 | 3' flanking    |                          | 6  | T, 0.3183    | TT/CT/CC | 63/341/332 | 47.01/48.22/47.16 | 12.74/12.21/13.05 | 0.1390  | 0.2132 | 0.5146        | 0.8199 |
| p87749                       | rs76465225  | 125261771 | 3' flanking    |                          | 7  | A, 0.0844    | AA/GA/GG | 7/109/620  | 43.03/47.81/47.93 | 19.91/12.52/12.66 | -0.1992 | 0.3402 | 0.5583        | 0.8199 |
| p87927                       | rs838880    | 125261593 | 3' flanking    |                          | 5  | A, 0.2414    | AA/GA/GG | 39/275/418 | 44.74/48.67/47.52 | 12.40/12.15/13.23 | 0.0198  | 0.2302 | 0.9314        | 0.9670 |
| <b>MAF between 1-5%</b>      |             |           |                |                          |    |              |          |            |                   |                   |         |        |               |        |
| p1316                        | rs10396208  | 125348204 | Exon 1         | Cys21Cys                 | 2b | T, 0.0476    | CC/CT/TT | 652/58/4   | 47.77/49.2/47.27  | 12.64/12.69/18.13 | 0.2987  | 0.4428 | 0.5001        | 0.8199 |
| p1419                        | rs201717369 | 125348101 | Intron 1       |                          | 4  | A, 0.0121    | AA/GA/GG | 1/14/707   | 55.72/48.94/47.8  | NA/15.28/12.67    | 0.4892  | 0.8717 | 0.5748        | 0.8199 |
| p7650                        | rs11615630  | 125341870 | Intron 1       |                          | 5  | A, 0.0436    | GG/GA    | 685/67     | 47.63/49.16       | 12.20/16.83       | 0.3382  | 0.4681 | 0.4702        | 0.8199 |
| p45627                       | rs12297372  | 125303893 | Intron 1       |                          | 5  | G, 0.0487    | GG/AG/AA | 1/68/659   | 30.17/48.3/47.89  | NA/12.68/12.74    | -0.0483 | 0.4556 | 0.9156        | 0.9622 |
| p46964                       | rs114061302 | 125302556 | Intron 1       |                          | 4  | A, 0.0388    | AA/GA/GG | 1/55/688   | 34.33/48.54/47.73 | NA/13.75/12.65    | 0.0526  | 0.4975 | 0.9158        | 0.9622 |
| p50118                       | rs58710319  | 125299402 | Intron 3       |                          | 5  | T, 0.0208    | CT/CC    | 31/711     | 50.42/47.73       | 13.43/12.65       | 0.7885  | 0.6704 | 0.2399        | 0.6829 |
| p50380                       | rs141748317 | 125299140 | Intron 3       |                          | 2b | G, 0.0112    | AA/AG    | 723/15     | 47.81/48.13       | 12.68/15.76       | -0.0273 | 0.9564 | 0.9772        | 0.9848 |
| p50489                       | rs61320152  | 125299031 | Intron 3       |                          | 4  | T, 0.0257    | GG/GT    | 699/38     | 47.82/48.65       | 12.69/13.60       | 0.2390  | 0.6110 | 0.6958        | 0.8449 |
| p54445                       | rs60910935  | 125295075 | Intron 5       |                          | 4  | G, 0.0418    | AA/AG/GG | 650/56/2   | 47.98/46.86/53.78 | 13.00/10.86/1.84  | -0.1247 | 0.4830 | 0.7963        | 0.9101 |
| p54475                       | rs60227139  | 125295045 | Intron 5       |                          | 4  | T, 0.0437    | CC/CT/TT | 670/61/2   | 47.84/47.01/53.7  | 12.92/10.81/1.84  | -0.0602 | 0.4628 | 0.8966        | 0.9622 |
| p77682                       | rs150082885 | 125271838 | Intron 10      |                          | 5  | G, 0.0106    | AA/AG/GG | 716/13/1   | 47.88/48.15/31.47 | 12.76/13.91/NA    | -0.5377 | 0.9010 | 0.5509        | 0.8199 |
| p78791                       | rs75289200  | 125270729 | Intron 11      |                          | 5  | C, 0.0321    | TC/TT    | 46/679     | 50.26/47.65       | 14.67/12.57       | 0.7037  | 0.5581 | 0.2078        | 0.6829 |
| p82019                       | rs838890    | 125267501 | Intron 11      |                          | 5  | T, 0.0320    | CC/CT/TT | 683/42/2   | 48.07/44.74/39.26 | 12.91/10.83/17.25 | -1.0051 | 0.5373 | 0.0618        | 0.4530 |
| p82340                       | rs77483223  | 125267180 | Intron 12      |                          | 5  | A, 0.0231    | GA/GG    | 35/699     | 44.56/47.96       | 11.90/12.76       | -1.0458 | 0.6373 | 0.1012        | 0.5098 |
| p82434                       | rs838889    | 125267086 | Intron 12      |                          | 5  | C, 0.0315    | CC/TC/TT | 2/42/695   | 39.33/44.57/48.04 | 17.25/10.84/12.85 | -1.0389 | 0.5352 | 0.0526        | 0.4473 |
| p86245                       | rs188375019 | 125263275 | Intron 12      |                          | 4  | T, 0.0341    | CC/CT    | 690/50     | 47.7/50.2         | 12.65/12.86       | 0.7447  | 0.5344 | 0.1639        | 0.6236 |
| p86316                       | rs701104    | 125263204 | Intron 12      |                          | 4  | T, 0.0487    | TT/GT/GG | 2/66/643   | 39.94/45.01/48.22 | 7.78/11.60/12.86  | -0.9838 | 0.4484 | <b>0.0286</b> | 0.3887 |
| p86967                       | rs187492239 | 125262553 | Exon 13-3' UTR |                          | 4  | G, 0.0355    | AA/AG    | 686/52     | 47.68/50.25       | 12.71/12.51       | 0.7743  | 0.5256 | 0.1412        | 0.5818 |
| p87611                       | rs190688220 | 125261909 | 3' flanking    |                          | 4  | T, 0.0316    | CC/CT    | 691/46     | 47.66/50.44       | 12.72/12.61       | 0.8329  | 0.5573 | 0.1355        | 0.5759 |
| p87681                       | rs838883    | 125261839 | 3' flanking    |                          | 5  | A, 0.0459    | AA/GA/GG | 1/65/646   | 45.6/44.85/48.19  | NA/11.43/12.90    | -0.9433 | 0.4647 | <b>0.0427</b> | 0.4471 |
| <b>MAF ≤1%</b>               |             |           |                |                          |    |              |          |            |                   |                   |         |        |               |        |
| p1048<br>insC<br>(1048_1049) |             | 125348472 | Exon 1-5' UTR  |                          | 2a | insC, 0.0079 | WI/WW    | 12/723     | 45.31/47.92       | 15.77/12.65       | -0.9389 | 1.0655 | 0.3785        | 0.7635 |
| p49759                       | rs146272788 | 125299761 | Intron 2       |                          | 5  | T, 0.0020    | CC/CT    | 725/3      | 47.84/56.6        | 12.78/13.38       | 2.5988  | 2.1256 | 0.2219        | 0.6829 |

|        |             |           |                                 |           |   |           |       |        |             |             |         |        |               |        |
|--------|-------------|-----------|---------------------------------|-----------|---|-----------|-------|--------|-------------|-------------|---------|--------|---------------|--------|
| p49978 | rs5891      | 125299542 | Exon 3                          | Val135Ile | 5 | A, 0.0058 | GA/GG | 9/743  | 52.42/47.7  | 18.19/12.61 | 1.3374  | 1.2347 | 0.2791        | 0.6833 |
| p50024 | rs368880622 | 125299496 | Intron 3                        |           | 5 | T, 0.0026 | GG/GT | 737/3  | 47.83/53.32 | 12.72/12.83 | 1.6506  | 2.1188 | 0.4362        | 0.8025 |
| p50954 |             | 125298566 | Intron 4                        |           | 5 | C, 0.0007 | TC/TT | 1/735  | 63.83/47.81 | NA/12.71    | 4.5639  | 3.6627 | 0.2131        | 0.6829 |
| p52919 |             | 125296601 | Intron 4                        |           | 5 | T, 0.0013 | GG/GT | 734/2  | 47.87/24.62 | 12.71/9.26  | -7.4063 | 2.5863 | <b>0.0043</b> | 0.1465 |
| p52995 | rs113910315 | 125296525 | Intron 4-<br>splice site        |           | 5 | G, 0.0020 | TG/TT | 3/740  | 43.06/47.83 | 12.96/12.72 | -1.4175 | 2.1192 | 0.5038        | 0.8199 |
| p53372 | rs115604379 | 125296148 | Intron 5                        |           | 5 | T, 0.0066 | CC/CT | 729/10 | 47.68/58.2  | 12.64/13.03 | 3.0372  | 1.1642 | <b>0.0093</b> | 0.2190 |
| p54611 |             | 125294909 | Intron 5                        |           | 4 | C, 0.0007 | TC/TT | 1/742  | 19.59/47.86 | NA/12.68    | -9.5243 | 3.6710 | <b>0.0097</b> | 0.2190 |
| p54627 |             | 125294893 | Intron 5                        |           | 4 | C, 0.0020 | GC/GG | 3/733  | 50.9/47.79  | 15.45/12.75 | 0.9473  | 2.1330 | 0.6571        | 0.8199 |
| p54856 |             | 125294664 | Intron 6                        |           | 4 | T, 0.0007 | CC/CT | 742/1  | 47.85/21.48 | 12.70/NA    | -8.4305 | 3.6579 | <b>0.0215</b> | 0.3243 |
| p57004 | rs187562853 | 125292516 | Intron 6                        |           | 4 | A, 0.0098 | GG/GA | 721/15 | 47.61/53.57 | 12.63/18.00 | 1.6474  | 0.9619 | 0.0872        | 0.4560 |
| p77181 | rs146246031 | 125272339 | Intron 9                        |           | 7 | C, 0.0053 | TC/TT | 6/731  | 45.71/47.91 | 12.57/12.72 | -0.6173 | 1.5007 | 0.6809        | 0.8343 |
| p77381 | rs138499966 | 125272139 | Intron 9                        |           | 6 | C, 0.0046 | TC/TT | 7/735  | 53.23/47.76 | 17.65/12.68 | 1.5523  | 1.3921 | 0.2652        | 0.6829 |
| p77620 | rs377124254 | 125271900 | Intron 10                       |           | 5 | A, 0.0007 | GA/GG | 1/735  | 90.2/47.77  | NA/12.67    | 11.5518 | 3.6514 | <b>0.0016</b> | 0.1104 |
| p77704 |             | 125271816 | Intron 10                       |           | 5 | A, 0.0040 | CA/CC | 5/726  | 42.75/47.86 | 9.16/12.79  | -1.4602 | 1.6591 | 0.3791        | 0.7635 |
| p78255 | rs184052375 | 125271265 | Intron 10                       |           | 4 | G, 0.0072 | AA/AG | 732/11 | 47.75/52.05 | 12.64/17.17 | 1.1808  | 1.1134 | 0.2893        | 0.6833 |
| p81863 | rs185445624 | 125267657 | Intron 11                       |           | 5 | A, 0.0020 | GA/GG | 3/739  | 45.05/47.83 | 20.36/12.71 | -0.9612 | 2.1241 | 0.6510        | 0.8199 |
| p82264 | rs141545424 | 125267256 | Exon 12                         | Gly501Gly | 5 | A, 0.0007 | CA/CC | 1/739  | 90.31/47.77 | NA/12.66    | 11.5850 | 3.6469 | <b>0.0016</b> | 0.1104 |
| p82369 | rs75446635  | 125267151 | Intron 12                       |           | 5 | A, 0.0059 | GA/GG | 9/733  | 50.65/47.8  | 20.95/12.59 | 0.5896  | 1.2312 | 0.6322        | 0.8199 |
| p87266 | rs150512235 | 125262254 | Exon 13-<br>3' UTR <sup>f</sup> |           | 4 | C, 0.0057 | TC/TT | 9/746  | 48.46/47.75 | 20.83/12.58 | -0.0325 | 1.2316 | 0.9789        | 0.9848 |
| p87694 |             | 125261826 | 3' flanking                     |           | 5 | T, 0.0020 | CC/CT | 722/3  | 47.85/59.52 | 12.75/12.25 | 3.4021  | 2.1251 | 0.1098        | 0.5151 |

del/D, deletion; FDR, false discovery rate; HDL-C, high-density lipoprotein cholesterol; ins/I, insertion; MA, minor allele; MAF, minor allele frequency; NA, not analyzed; RegDB, RegulomeDB score; SD, standard deviation; SE, standard error; SNP, single nucleotide polymorphism; UTR, untranslated region; W, wild type allele for insertion or deletion on RefSeq.

All alleles on the reverse strand. Splice site is defined as  $\pm 20$  bp from the start or end of an exon.

All 10 novel variants identified in this study have been submitted to dbSNP database (batch ID: SCARB1\_AB): [http://www.ncbi.nlm.nih.gov/SNP/snp\\_viewTable.cgi?handle=KAMBOH](http://www.ncbi.nlm.nih.gov/SNP/snp_viewTable.cgi?handle=KAMBOH).

HDL-C values were Box-Cox transformed. Results were adjusted for covariates: sex, age, waist, current smoking (yes/no), and minutes of daily walking or biking to work (jobmin).

Nominally significant *P*-values ( $P < 0.05$ ) and FDR values that passed the threshold (FDR  $< 0.20$ ) are shown in **bold**.

<sup>a, c</sup> RefSeq of *SCARB1*: hg19, NM\_005505 (CHIP Bioinformatics).

<sup>b</sup> dbSNP build 139: GRCh37.p10.

<sup>d</sup> The RegulomeDB (version 1.0) scoring scheme is described at the footnote of Additional file 4 Table S4 or can be seen at <http://regulome.stanford.edu/help>.

<sup>e</sup> Corresponding to a *q*-value from Benjamini-Hochberg procedure.

<sup>f</sup> Close to a miRNA-145 seed site based on TargetScanHuman (version 6.2, <http://www.targetscan.org/>).
