# Supplementary material for: Genetic contribution of SCARB1 variants to lipid traits in African Blacks: a candidate gene association study
Source: Springer Nature journal article supplement (doi:10.1186/s12881-015-0250-6), 2015-11-12
Supplement: MOESM1 [file 9741426]

**Table S1. Characteristics and lipid profile of the entire sample of 788 African Blacks stratified by sex.**

| <b>Variables</b>                 | <b>Males<sup>a</sup></b> | <b>Females<sup>a</sup></b> | <b>The Entire Sample<sup>a</sup></b> |
|----------------------------------|--------------------------|----------------------------|--------------------------------------|
| <b>N</b>                         | 495                      | 293                        | 788                                  |
| <b>Age, years</b>                | 42.35 ± 8.62             | 38.60 ± 7.43               | 40.95 ± 8.39                         |
| <b>BMI, kg/m<sup>2</sup></b>     | 22.03 ± 3.31             | 24.31 ± 4.71               | 22.87 ± 4.04                         |
| <b>Total Cholesterol, mg/dL</b>  | 166.65 ± 37.37           | 181.02 ± 38.69             | 172.01 ± 38.47                       |
| <b>LDL-Cholesterol, mg/dL</b>    | 104.52 ± 33.71           | 117.20 ± 34.14             | 109.25 ± 34.40                       |
| <b>HDL-Cholesterol, mg/dL</b>    | 46.03 ± 12.61            | 51.00 ± 12.71              | 47.88 ± 12.87                        |
| <b>Triglycerides, mg/dL</b>      | 78.72 ± 42.13            | 63.27 ± 31.88              | 72.96 ± 39.32                        |
| <b>Apolipoprotein A-I, mg/dL</b> | 136.13 ± 29.37           | 138.54 ± 26.85             | 137.03 ± 28.46                       |
| <b>Apolipoprotein B, mg/dL</b>   | 65.35 ± 21.71            | 69.69 ± 22.74              | 66.98 ± 22.19                        |

BMI, body mass index; HDL-Cholesterol, high-density lipoprotein cholesterol; LDL-Cholesterol, low-density lipoprotein cholesterol.

Values are presented as unadjusted means ± standard deviation (SD) unless otherwise mentioned.

<sup>a</sup> All data were unadjusted and included individuals with missing values or outliers (values beyond mean ± 3.5 SD).
