# Supplementary material for: Genetic contribution of SCARB1 variants to lipid traits in African Blacks: a candidate gene association study
Source: Springer Nature journal article supplement (doi:10.1186/s12881-015-0250-6), 2015-11-12
Supplement: MOESM2 [file 9741426]

**Table S2. Primer sequences for 14 polymerase chain reaction (PCR) fragments, and the sizes of 13 *SCARB1* exons.**

| <b>Fragment</b>    | <b>Forward Primer Sequence</b> | <b>Reverse Primer Sequence</b> | <b>Size of PCR Fragment (bp)</b> | <b>Size of Exon (bp)</b> |
|--------------------|--------------------------------|--------------------------------|----------------------------------|--------------------------|
| <b>Exon 1</b>      | 5' -CCCATAGACGTTTTGGCTCA-3'    | 5' -AGCAACCTGTCCACACTCCT-3'    | 896                              | 379                      |
| <b>Exon 2</b>      | 5' -TCCCTGCTGTGTTTTCTCTG-3'    | 5' -CTGGTGATTCGCACCTGTAA-3'    | 844                              | 158                      |
| <b>Exon 3</b>      | 5' -TGGCTTGGAGAGATGAGAGA-3'    | 5' -TGGGAAACTCAGAACCCACT-3'    | 752                              | 142                      |
| <b>Exon 4</b>      | 5' -CTGTCTTGTGAGGGCTGAG-3'     | 5' -CAGGTTGCCAAGAGTCAAGA-3'    | 848                              | 204                      |
| <b>Exon 5</b>      | 5' -CTCCTAGAAAGCTCCCAAGC-3'    | 5' -TTCACCTCCTGTGTTCAAGC-3'    | 791                              | 96                       |
| <b>Exon 6</b>      | 5' -CTCACCTGCTCACCACACTT-3'    | 5' -TGATGTCTCAGCACCCAGAT-3'    | 770                              | 116                      |
| <b>Exon 7</b>      | 5' -ACAGGTGTGAGCCATAATGC-3'    | 5' -GGTATCCAGGAGAGCACGAT-3'    | 989                              | 167                      |
| <b>Exon 8</b>      | 5' -AGGGACACACTCCTGTGGAT-3'    | 5' -ACAGAACTTCACACGGGACA-3'    | 1042                             | 119                      |
| <b>Exon 9</b>      | 5' -TCAGGAGAGGAGATCCCAGT-3'    | 5' -CGTGTAGGAAACAGCTTGGA-3'    | 906                              | 74                       |
| <b>Exon 10</b>     | 5' -TGAGGGTAAGAAATGGCAGA-3'    | 5' -ACAAGCTAGGCCAGAAGGAA-3'    | 862                              | 52                       |
| <b>Exon 11</b>     | 5' -TCCTTCTGGCCTAGCTTGTT-3'    | 5' -GGTGCTGACTTGATGAATGG-3'    | 990                              | 147                      |
| <b>Exon 12</b>     | 5' -ACATGCGGGTAAACTCAACA-3'    | 5' -AGCCTTGCTCCTGTCTTTCT-3'    | 1033                             | 129                      |
| <b>Exon 13 (1)</b> | 5' -GCTCTGCCCTCACTGTATT-3'     | 5' -TGTCAGTTTAGGCTGGAGGA-3'    | 978                              |                          |
| <b>Exon 13 (2)</b> | 5' -ATGGAGTGAGCACAAGATGC-3'    | 5' -TAAGGGGAAAAGGGCTAACA-3'    | 1038                             | 959                      |

RefSeq of *SCARB1*: hg19, NM\_005505 (CHIP Bioinformatics, University of Florida, <http://snpper.chip.org/>).
