# Supplementary material for: Genetic contribution of SCARB1 variants to lipid traits in African Blacks: a candidate gene association study
Source: Springer Nature journal article supplement (doi:10.1186/s12881-015-0250-6), 2015-11-12
Supplement: MOESM6 [file 9741426]

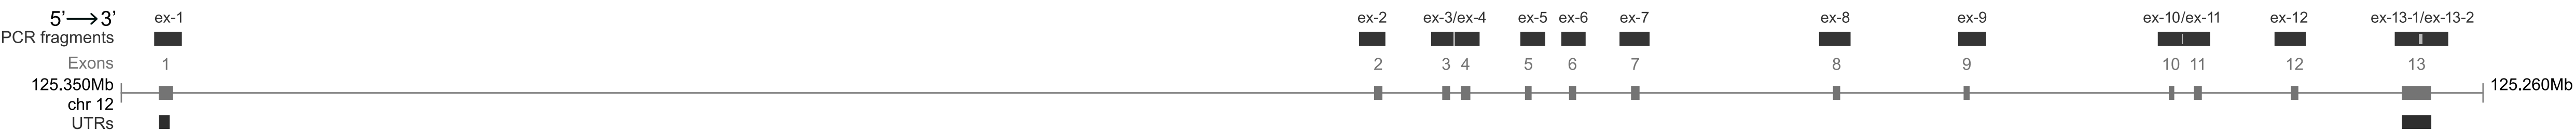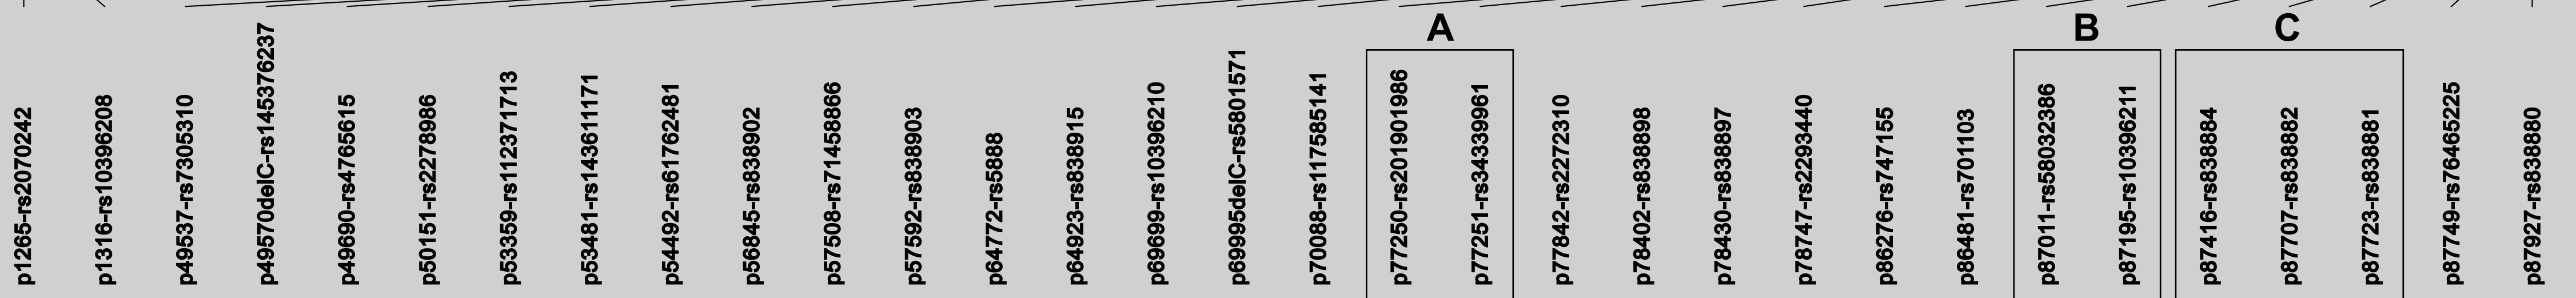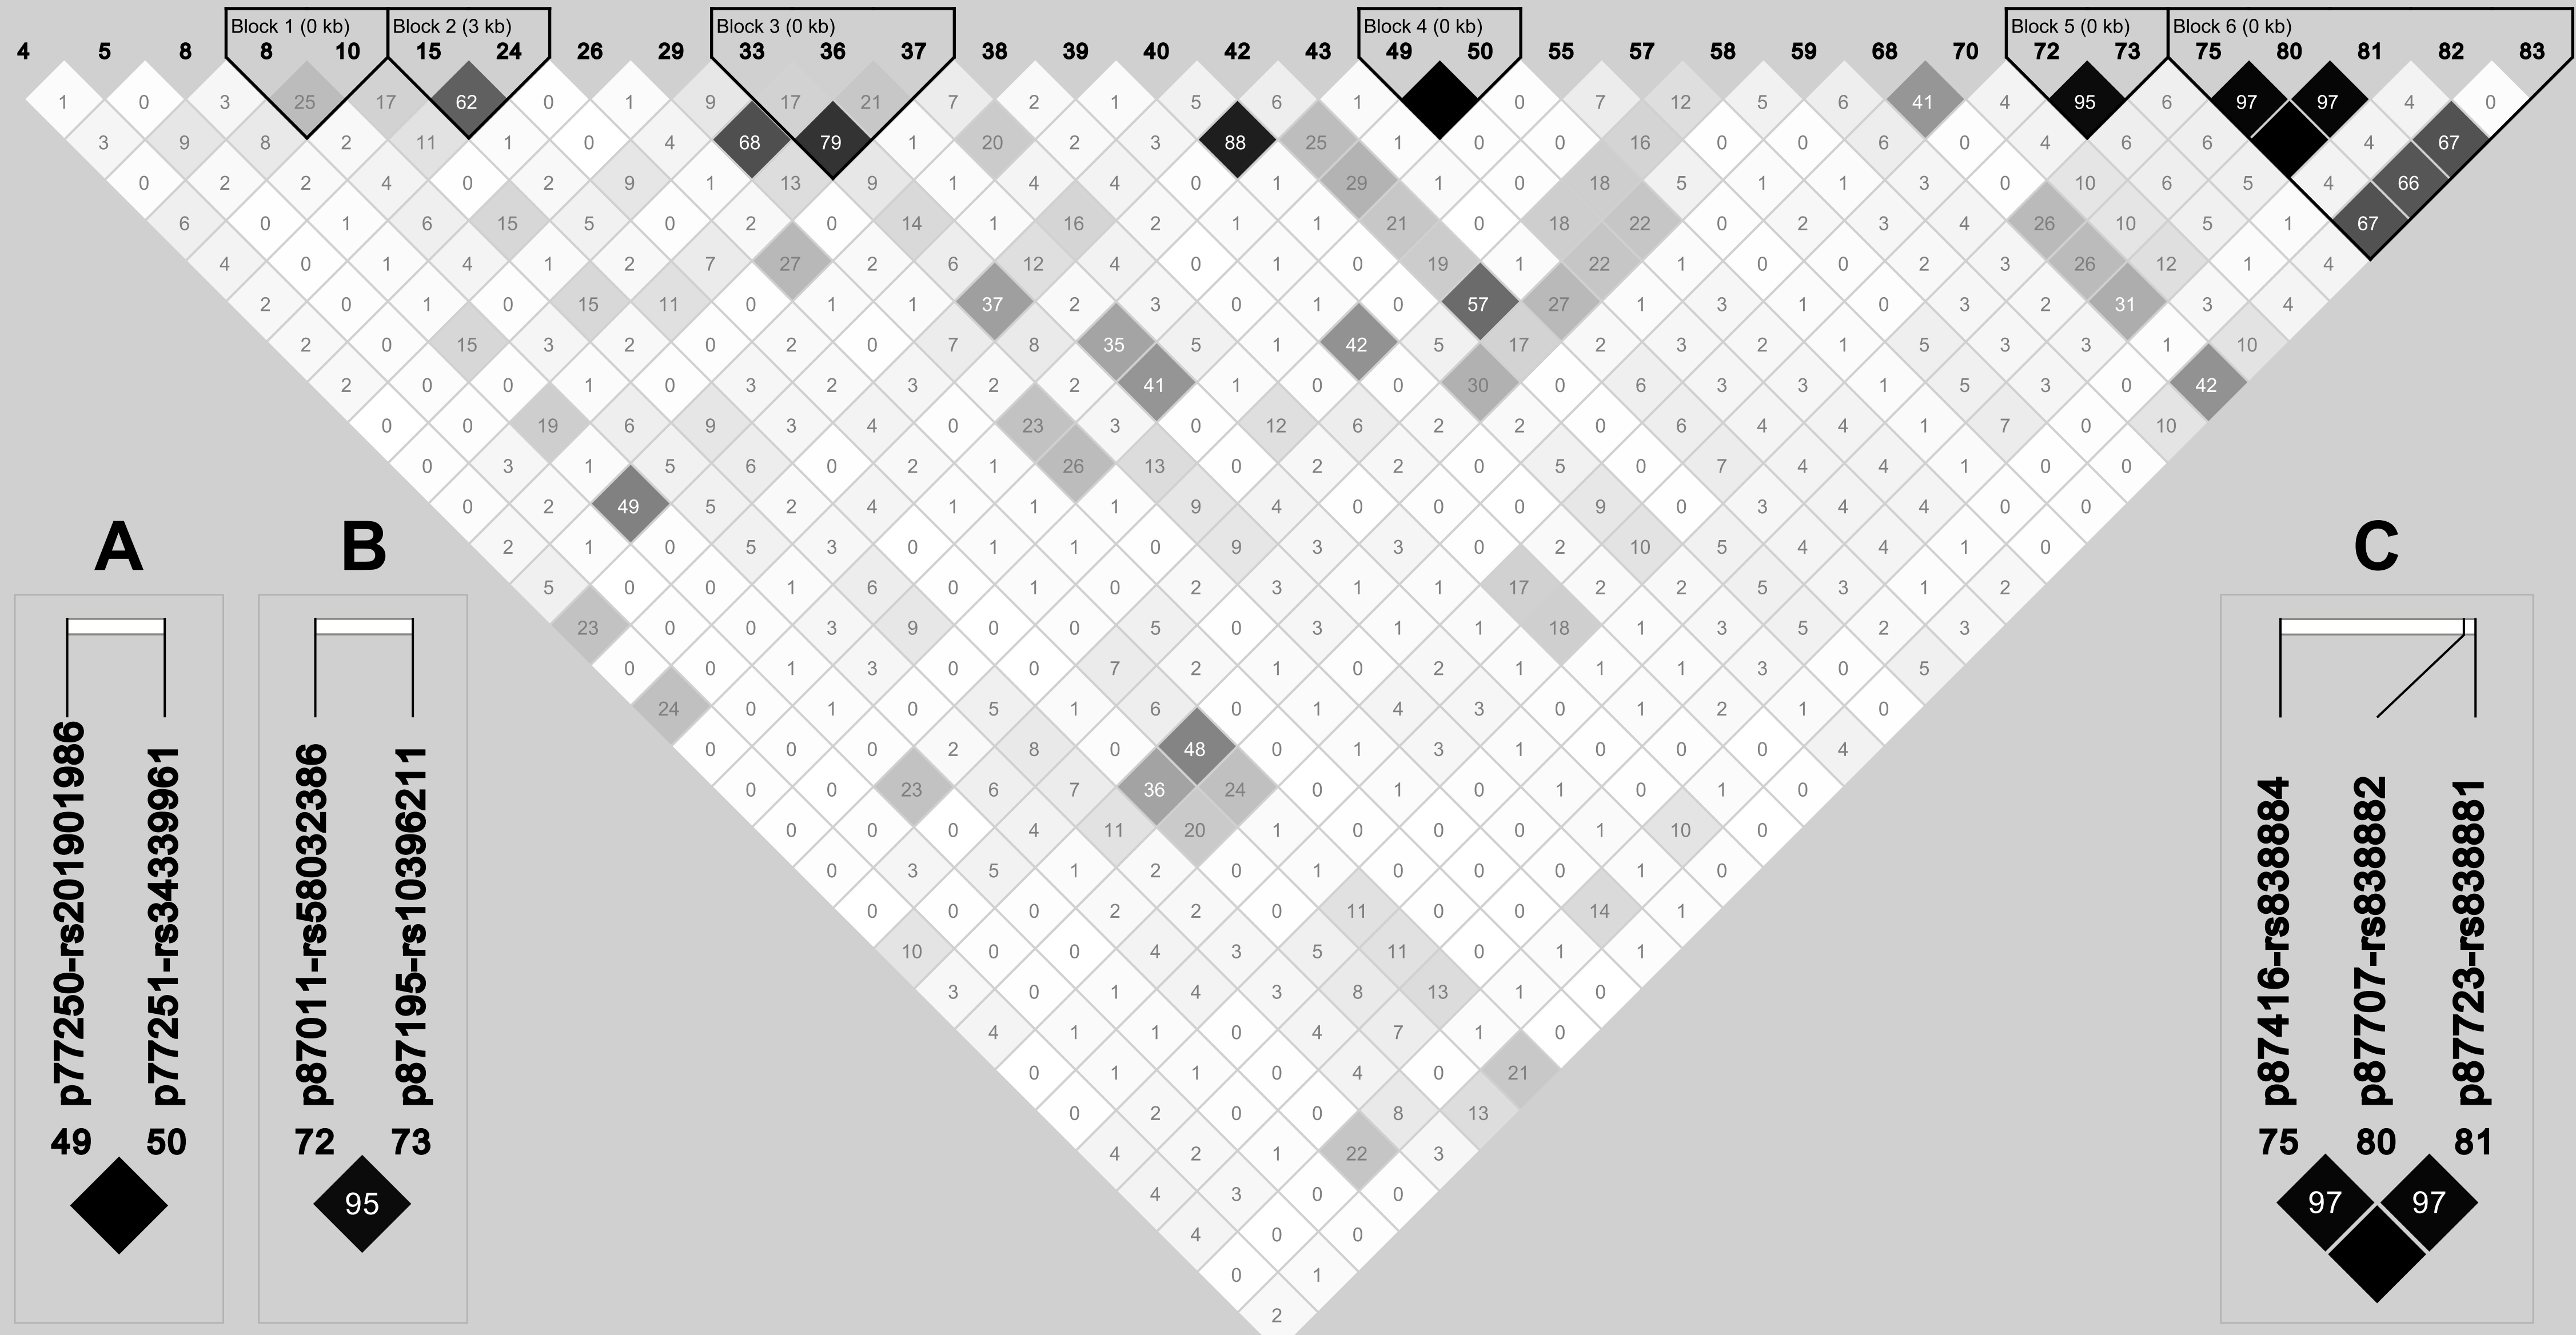

LD structure by sequencing
