# Supplementary material for: Genetic contribution of SCARB1 variants to lipid traits in African Blacks: a candidate gene association study
Source: Springer Nature journal article supplement (doi:10.1186/s12881-015-0250-6), 2015-11-12
Supplement: MOESM10 [file 9741426]

**Table S7. List of 87 SCARB1 common tagSNPs identified by Tagger analysis (MAF  $\geq$ 5% and  $r^2 \geq$ 0.90) of the variants genotyped in the entire sample (capturing a total of 94 variants with a mean  $r^2$  of 0.996).**

| Bin # | TagSNP        | Alleles Captured |
|-------|---------------|------------------|
| 1     | p1265         |                  |
| 2     | p4072         |                  |
| 3     | p5055         |                  |
| 4     | p6600         |                  |
| 5     | p10292        |                  |
| 6     | p10991        |                  |
| 7     | p13570        |                  |
| 8     | p16565        |                  |
| 9     | <b>p20207</b> |                  |
| 10    | p20694        |                  |
| 11    | <b>p20741</b> |                  |
| 12    | p21145        |                  |
| 13    | p22116        |                  |
| 14    | p22168        |                  |
| 15    | p22331        |                  |
| 16    | p22675        |                  |
| 17    | p28137        |                  |
| 18    | p28692        |                  |
| 19    | p28957        |                  |
| 20    | p29749        |                  |
| 21    | p31072        |                  |
| 22    | p31938        |                  |
| 23    | p32129        |                  |
| 24    | p32273        |                  |
| 25    | p32290        |                  |
| 26    | p32395        |                  |
| 27    | p32750        |                  |
| 28    | p32777        |                  |
| 29    | p32860        |                  |
| 30    | p33531        |                  |
| 31    | p36094        |                  |
| 32    | p36361        |                  |
| 33    | p36908        |                  |
| 34    | p37095        |                  |
| 35    | p41632        |                  |
| 36    | p42467        |                  |
| 37    | <b>p45516</b> |                  |
| 38    | p49537        |                  |
| 39    | p49570delC    |                  |
| 40    | <b>p49690</b> |                  |
| 41    | p50151        | p48969           |
| 42    | p51888        |                  |
| 43    | p52096        |                  |
| 44    | p52556        |                  |
| 45    | p52610        |                  |

|    |               |            |
|----|---------------|------------|
| 46 | p52956        |            |
| 47 | p53359        |            |
| 48 | p53790        |            |
| 49 | p54492        |            |
| 50 | p55923        |            |
| 51 | <b>p55963</b> |            |
| 52 | p57107        |            |
| 53 | p57508        | p62615     |
| 54 | p57592        |            |
| 55 | p58514        | p56845     |
| 56 | p58664        |            |
| 57 | p61872        |            |
| 58 | p62140        |            |
| 59 | p62409        |            |
| 60 | <b>p63483</b> |            |
| 61 | <b>p64772</b> |            |
| 62 | p64923        |            |
| 63 | p65999        | p60255     |
| 64 | p67439        |            |
| 65 | p67700        |            |
| 66 | p69013        | p69995delC |
| 67 | p69699        |            |
| 68 | p71867        |            |
| 69 | p72197        |            |
| 70 | p72777        |            |
| 71 | p75766        |            |
| 72 | p75778        |            |
| 73 | p76757        |            |
| 74 | p77842        |            |
| 75 | p78402        |            |
| 76 | p78430        |            |
| 77 | p78747        |            |
| 78 | <b>p79721</b> |            |
| 79 | <b>p79828</b> | p80045     |
| 80 | p83547        |            |
| 81 | <b>p83884</b> |            |
| 82 | p86276        |            |
| 83 | p86481        |            |
| 84 | p87011        |            |
| 85 | p87723        |            |
| 86 | p87749        |            |
| 87 | p87927        |            |

del, deletion; MAF, minor allele frequency; SNP, single nucleotide polymorphism.

All SNPs are presented with "SNP Name"; see Additional file 9 Table S6 for details for each SNP.

SNPs with nominally significant evidence of single-site association with either high-density lipoprotein cholesterol or apolipoprotein A-I ( $P < 0.05$ ; Additional file 14 Table S9 and Additional file 15 Table S10) observed in the current study are shown in **bold**.
