# Supplementary material for: Genetic contribution of SCARB1 variants to lipid traits in African Blacks: a candidate gene association study
Source: Springer Nature journal article supplement (doi:10.1186/s12881-015-0250-6), 2015-11-12
Supplement: MOESM13 [file 9741426]

**Table S8. Covariates used for the statistical analysis of lipid variables.**

| Covariates                         | Lipid Traits |       |    |        |      |
|------------------------------------|--------------|-------|----|--------|------|
|                                    | HDL-C        | LDL-C | TG | ApoA-I | ApoB |
| Sex (M/F)                          | X            | X     | X  | X      |      |
| Age, years                         | X            |       | X  | X      |      |
| Body mass index, kg/m <sup>2</sup> |              | X     |    |        | X    |
| Waist, cm                          | X            |       | X  |        |      |
| Current smoking (yes/no)           | X            | X     |    |        |      |
| Jobmin, min                        | X            | X     | X  |        |      |
| Staff (junior/senior)              |              | X     |    |        | X    |

ApoA-I, apolipoprotein A-I; ApoB, apolipoprotein B; HDL-C, high-density lipoprotein cholesterol; LDL-C, low-density lipoprotein cholesterol; TG, triglycerides.

All phenotypic values were Box-Cox transformed prior to statistical analyses.

“X” represents covariates that were used in adjustment in statistical analyses.

Body mass index (BMI), weight (kg)/[height (m)]<sup>2</sup>.

Jobmin, minutes of walking or biking to work each day.

Staff, occupational status: junior, non-professional staff with salary grades 1-6; and senior, professional and administrative staff with salary grades 7-16.

Waist, waist measurement at the narrowest point or at the umbilicus if the narrowest point was undetermined.
