# Supplementary material for: Genetic contribution of SCARB1 variants to lipid traits in African Blacks: a candidate gene association study
Source: Springer Nature journal article supplement (doi:10.1186/s12881-015-0250-6), 2015-11-12
Supplement: MOESM15 [file 9741426]

**Table S10. Single-site association results for 136 SCARB1 genotyped variants with ApoA-I.**

| SNP Name <sup>a</sup>          | SNP ID <sup>b</sup> | Chr12 Position <sup>c</sup> | Location | Amino Acid Change | RegDB Score <sup>d</sup> | MA, MAF   | Genotype | Genotype Count | Adjusted Mean (mg/dL) | SD (mg/dL)        | $\beta$ | SE     | P             | FDR <sup>e</sup> |
|--------------------------------|---------------------|-----------------------------|----------|-------------------|--------------------------|-----------|----------|----------------|-----------------------|-------------------|---------|--------|---------------|------------------|
| <b>MAF <math>\geq</math>5%</b> |                     |                             |          |                   |                          |           |          |                |                       |                   |         |        |               |                  |
| p1265                          | rs2070242           | 125348255                   | Exon 1   | Ser4Ser           | 2b                       | T, 0.1284 | CC/CT/TT | 545/165/10     | 138.25/132.98/141.25  | 28.10/26.38/36.12 | -1.2535 | 0.7296 | 0.0862        | 0.5583           |
| p4072                          | rs7139401           | 125345448                   | Intron 1 |                   | 3b                       | C, 0.4386 | TT/TC/CC | 236/350/148    | 136.26/138.43/135.18  | 27.17/28.38/27.51 | -0.0802 | 0.4732 | 0.8654        | 0.9654           |
| p5055                          | rs11057869          | 125344465                   | Intron 1 |                   | 7                        | A, 0.0740 | AA/GA/GG | 7/95/650       | 138.23/138.44/136.59  | 27.94/25.35/28.24 | 0.5638  | 0.8858 | 0.5247        | 0.8490           |
| p6600                          | rs12831105          | 125342920                   | Intron 1 |                   | 7                        | T, 0.1188 | CC/CT/TT | 571/152/10     | 137.08/135.15/135.11  | 27.64/27.93/25.69 | -0.5681 | 0.7373 | 0.4412        | 0.8109           |
| p10292                         | rs4765181           | 125339228                   | Intron 1 |                   | 5                        | T, 0.2490 | TT/GT/GG | 44/287/426     | 132.59/138.1/136.53   | 27.04/27.35/28.00 | -0.0286 | 0.5474 | 0.9583        | 0.9931           |
| p10991                         | rs10773112          | 125338529                   | Intron 1 |                   | 4                        | A, 0.3534 | GG/GA/AA | 309/339/90     | 135/138.69/135.87     | 28.55/26.69/27.19 | 0.4896  | 0.4950 | 0.3230        | 0.7761           |
| p13570                         | rs11057864          | 125335950                   | Intron 1 |                   | 4                        | T, 0.1180 | TT/GT/GG | 15/147/591     | 131.15/138.99/136.48  | 19.01/28.45/27.80 | 0.3006  | 0.7107 | 0.6725        | 0.9051           |
| p16565                         | rs10773111          | 125332955                   | Intron 1 |                   | 6                        | A, 0.1928 | GG/GA/AA | 486/246/23     | 135.99/138.39/134.71  | 27.30/28.56/28.10 | 0.4484  | 0.6077 | 0.4608        | 0.8230           |
| p20207                         | rs11057853          | 125329313                   | Intron 1 |                   | 5                        | A, 0.4484 | AA/GA/GG | 153/366/230    | 136.24/139.87/132.18  | 27.54/29.21/25.20 | 0.8422  | 0.4726 | 0.0751        | 0.5540           |
| p20694                         | rs11057852          | 125328826                   | Intron 1 |                   | 7                        | A, 0.1050 | GG/GA/AA | 587/129/11     | 136.59/138.27/135.18  | 27.73/28.21/20.66 | 0.3519  | 0.7640 | 0.6452        | 0.9003           |
| p20741                         | rs11057851          | 125328779                   | Intron 1 |                   | 5                        | T, 0.3237 | TT/CT/CC | 73/336/337     | 130.12/136.32/138.94  | 27.67/27.25/28.14 | -1.2331 | 0.5117 | <b>0.0162</b> | 0.3186           |
| p21145                         | rs3924313           | 125328375                   | Intron 1 |                   | 6                        | T, 0.1772 | CC/CT/TT | 511/221/23     | 136.58/137.05/136.75  | 27.68/28.31/22.08 | 0.1215  | 0.6158 | 0.8437        | 0.9642           |
| p22116                         | rs12370382          | 125327404                   | Intron 1 |                   | 1f                       | A, 0.0645 | GG/GA/AA | 650/89/3       | 135.9/139.94/107.7    | 27.29/31.23/14.64 | 0.5264  | 0.9717 | 0.5882        | 0.8589           |
| p22168                         | rs7137797           | 125327352                   | Intron 1 |                   | 2b                       | C, 0.3977 | CC/TC/TT | 112/358/262    | 139.7/135.97/135.95   | 27.57/26.56/28.95 | 0.5066  | 0.4888 | 0.3003        | 0.7761           |
| p22331                         | rs6488944           | 125327189                   | Intron 1 |                   | 4                        | G, 0.1474 | TT/TG/GG | 524/191/12     | 136.47/138.31/134.29  | 27.51/28.77/27.05 | 0.3684  | 0.6902 | 0.5936        | 0.8589           |
| p22675                         | rs12425134          | 125326845                   | Intron 1 |                   | 4                        | T, 0.0526 | TT/GT/GG | 2/74/668       | 149.31/139.33/136.52  | 0.28/23.43/28.01  | 1.1151  | 1.0532 | 0.2900        | 0.7761           |
| p28137                         | rs12229555          | 125321383                   | Intron 1 |                   | 7                        | G, 0.3896 | GG/AG/AA | 100/373/265    | 134.51/136.62/138.27  | 24.37/27.67/28.92 | -0.5752 | 0.5022 | 0.2524        | 0.7761           |
| p28692                         | rs4765622           | 125320828                   | Intron 1 |                   | 5                        | T, 0.2565 | TT/CT/CC | 42/298/406     | 134.55/140.06/135.18  | 28.51/29.32/26.22 | 0.7871  | 0.5534 | 0.1553        | 0.6416           |
| p28957                         | rs11057844          | 125320563                   | Intron 1 |                   | 5                        | A, 0.2362 | GG/GA/AA | 433/269/40     | 136.15/136.91/142.06  | 28.60/26.35/29.06 | 0.6107  | 0.5626 | 0.2781        | 0.7761           |
| p29749                         | rs10846751          | 125319771                   | Intron 1 |                   | 7                        | T, 0.4492 | TT/CT/CC | 142/366/215    | 132.92/137.38/138.1   | 25.65/27.79/28.67 | -0.7763 | 0.4856 | 0.1104        | 0.5748           |
| p31072                         | rs10846749          | 125318448                   | Intron 1 |                   | 4                        | G, 0.4461 | CC/CG/GG | 226/371/146    | 139.23/136.07/134.5   | 28.54/28.23/26.18 | -0.8005 | 0.4818 | 0.0970        | 0.5748           |
| p31938                         | rs10744182          | 125317582                   | Intron 1 |                   | 5                        | A, 0.1837 | AA/GA/GG | 25/226/493     | 131.55/136.6/137.11   | 27.78/27.47/28.13 | -0.4389 | 0.6139 | 0.4748        | 0.8255           |
| p32129                         | rs10773107          | 125317391                   | Intron 1 |                   | 7                        | T, 0.1009 | TT/GT/GG | 9/131/605      | 151.68/137.5/136.38   | 25.54/28.08/27.45 | 0.8714  | 0.7738 | 0.2605        | 0.7761           |
| p32273                         | rs12580803          | 125317247                   | Intron 1 |                   | 5                        | C, 0.1006 | TT/TC/CC | 627/117/18     | 135.83/140.74/140.03  | 27.84/27.87/24.49 | 1.2550  | 0.7258 | 0.0842        | 0.5583           |
| p32290                         | rs10744181          | 125317230                   | Intron 1 |                   | 5                        | C, 0.1238 | TT/TC/CC | 551/143/18     | 136.61/139.47/129.44  | 27.77/28.30/23.29 | 0.1584  | 0.7002 | 0.8211        | 0.9545           |
| p32395                         | rs12581963          | 125317125                   | Intron 1 |                   | 5                        | T, 0.1314 | TT/CT/CC | 11/177/570     | 134.74/134.94/137.17  | 27.03/27.17/27.89 | -0.6483 | 0.7013 | 0.3556        | 0.7761           |

|                |             |           |          |           |    |              |          |             |                      |                   |         |        |               |        |
|----------------|-------------|-----------|----------|-----------|----|--------------|----------|-------------|----------------------|-------------------|---------|--------|---------------|--------|
| p32750         | rs7967521   | 125316770 | Intron 1 |           | 7  | G, 0.3425    | GG/AG/AA | 91/304/315  | 135.77/138.19/136.64 | 27.06/27.89/28.28 | 0.0564  | 0.5011 | 0.9104        | 0.9749 |
| p32777         | rs11057841  | 125316743 | Intron 1 |           | 7  | A, 0.2805    | GG/GA/AA | 374/303/52  | 136.83/137.07/136.83 | 27.62/27.46/29.55 | 0.0373  | 0.5407 | 0.9450        | 0.9923 |
| p32860         | rs7967406   | 125316660 | Intron 1 |           | 6  | C, 0.0991    | CC/AC/AA | 9/135/616   | 142.53/137.42/136.54 | 29.57/26.48/28.02 | 0.4768  | 0.7717 | 0.5369        | 0.8490 |
| p33531         | rs11057838  | 125315989 | Intron 1 |           | 7  | A, 0.2278    | CC/CA/AA | 440/259/40  | 136.66/137.21/137.74 | 28.28/26.63/27.18 | 0.1993  | 0.5594 | 0.7218        | 0.9136 |
| p36094         | rs11608336  | 125313426 | Intron 1 |           | 4  | A, 0.1543    | GG/GA/AA | 526/195/16  | 136.58/137.43/130.93 | 26.64/30.54/19.66 | -0.0956 | 0.6599 | 0.8848        | 0.9654 |
| p36461         | rs4765178   | 125313059 | Intron 1 |           | 4  | T, 0.1671    | TT/CT/CC | 18/205/497  | 143.57/137.38/136.71 | 28.60/27.50/28.03 | 0.5087  | 0.6538 | 0.4368        | 0.8109 |
| p36908         | rs10846745  | 125312612 | Intron 1 |           | 4  | G, 0.3257    | GG/CG/CC | 78/335/337  | 133.81/138.5/136.23  | 26.52/28.07/27.17 | 0.0089  | 0.5014 | 0.9859        | 0.9965 |
| p37095         | rs10846744  | 125312425 | Intron 1 |           | 4  | G, 0.3056    | CC/CG/GG | 350/350/56  | 137.16/135.63/141.68 | 27.54/27.45/30.05 | 0.1538  | 0.5335 | 0.7732        | 0.9144 |
| p41632         | rs6488943   | 125307888 | Intron 1 |           | 5  | C, 0.2954    | CC/AC/AA | 52/312/340  | 139.91/137.51/137.18 | 25.93/27.34/27.81 | 0.3025  | 0.5440 | 0.5783        | 0.8571 |
| p42467         | rs11057830  | 125307053 | Intron 1 |           | 7  | T, 0.1523    | TT/CT/CC | 14/200/533  | 137.96/133.93/137.64 | 41.61/27.21/27.42 | -0.9351 | 0.6668 | 0.1612        | 0.6416 |
| p45516         | rs1902569   | 125304004 | Intron 1 |           | 5  | A, 0.1544    | AA/GA/GG | 18/191/523  | 142.37/137.21/136.5  | 23.01/25.54/28.50 | 0.5127  | 0.6537 | 0.4331        | 0.8109 |
| p48969         | rs2343394   | 125300551 | Intron 2 |           | 5  | T, 0.1898    | TT/CT/CC | 32/226/501  | 138.49/138.05/135.89 | 20.81/26.09/28.67 | 0.6411  | 0.5825 | 0.2714        | 0.7761 |
| p49537         | rs7305310   | 125299983 | Intron 2 |           | 5  | T, 0.1007    | CC/CT/TT | 601/118/16  | 136.94/137.31/131.4  | 28.45/24.39/24.26 | -0.2265 | 0.7408 | 0.7599        | 0.9144 |
| p49570<br>delC | rs145376237 | 125299950 | Intron 2 |           | 5  | delC, 0.2276 | DD/WD/WW | 37/260/437  | 132.41/139.59/135.62 | 31.14/26.82/28.01 | 0.4929  | 0.5706 | 0.3880        | 0.7761 |
| p49690         | rs4765615   | 125299830 | Intron 2 |           | 5  | A, 0.4426    | AA/GA/GG | 157/323/244 | 132.82/137.57/138.51 | 31.67/26.38/26.87 | -0.9139 | 0.4614 | <b>0.0480</b> | 0.5022 |
| p50151         | rs2278986   | 125299369 | Intron 3 |           | 5  | C, 0.1933    | CC/TC/TT | 33/226/494  | 142.72/137.51/135.83 | 21.16/25.91/28.90 | 0.8568  | 0.5828 | 0.1419        | 0.6311 |
| p51888         | rs7138304   | 125297632 | Intron 4 |           | 2b | T, 0.1079    | TT/CT/CC | 16/130/593  | 130.58/138.07/136.64 | 24.75/23.20/28.33 | -0.0031 | 0.7159 | 0.9965        | 0.9965 |
| p52096         | rs10846739  | 125297424 | Intron 4 |           | 3a | G, 0.4693    | GG/AG/AA | 172/342/221 | 135.77/137.19/136.77 | 28.27/27.28/27.46 | -0.1537 | 0.4586 | 0.7377        | 0.9144 |
| p52556         | rs11057820  | 125296964 | Intron 4 |           | 5  | A, 0.1000    | AA/GA/GG | 12/126/619  | 127.43/134.64/137.37 | 29.15/29.91/27.33 | -1.1588 | 0.7609 | 0.1282        | 0.6225 |
| p52610         | rs10846738  | 125296910 | Intron 4 |           | 4  | T, 0.1349    | TT/CT/CC | 13/172/553  | 130.76/135.7/137.19  | 33.53/27.12/27.43 | -0.6490 | 0.6886 | 0.3462        | 0.7761 |
| p52956         | rs77740046  | 125296564 | Intron 4 |           | 5  | T, 0.0546    | CC/CT/TT | 657/75/3    | 136.98/135.38/134.32 | 28.41/22.14/29.35 | -0.4428 | 1.0350 | 0.6689        | 0.9051 |
| p53359         | rs112371713 | 125296161 | Intron 5 |           | 5  | A, 0.1243    | AA/GA/GG | 10/161/554  | 129.69/140.18/136.1  | 21.21/27.65/28.05 | 0.8266  | 0.7340 | 0.2605        | 0.7761 |
| p53790         | rs4765614   | 125295730 | Intron 5 |           | 5  | A, 0.2653    | GG/GA/AA | 402/277/59  | 137.25/136.67/133.06 | 28.76/25.80/28.38 | -0.4621 | 0.5232 | 0.3775        | 0.7761 |
| p54492         | rs61762481  | 125295028 | Intron 5 |           | 4  | A, 0.1005    | AA/GA/GG | 8/137/618   | 148.92/134.86/137.03 | 32.80/27.06/27.71 | -0.1546 | 0.7735 | 0.8416        | 0.9642 |
| p55923         | rs838900    | 125293597 | Intron 6 |           | 7  | A, 0.3921    | AA/GA/GG | 115/346/282 | 138.57/136.64/135.92 | 31.53/27.67/26.43 | 0.3606  | 0.4823 | 0.4549        | 0.8230 |
| p55963         | rs7134858   | 125293557 | Intron 6 |           | 6  | T, 0.1560    | TT/CT/CC | 24/190/537  | 147.89/139.6/135.05  | 30.36/25.98/28.12 | 1.7537  | 0.6260 | <b>0.0052</b> | 0.2918 |
| p56845         | rs838902    | 125292675 | Intron 6 |           | 5  | G, 0.4249    | AA/AG/GG | 256/350/143 | 136.96/138.11/134.33 | 28.98/27.23/26.41 | -0.3052 | 0.4662 | 0.5129        | 0.8404 |
| p57107         | rs5892      | 125292413 | Exon 7   | Phe301Phe | 4  | T, 0.0589    | CC/CT/TT | 663/84/1    | 136.93/135.46/135.43 | 27.81/27.27/NA    | -0.4697 | 1.0308 | 0.6488        | 0.9003 |
| p57508         | rs71458866  | 125292012 | Intron 7 |           | 4  | A, 0.1130    | AA/GA/GG | 12/147/602  | 136.02/134.65/137.08 | 32.39/27.43/27.74 | -0.6325 | 0.7294 | 0.3861        | 0.7761 |
| p57592         | rs838903    | 125291928 | Intron 7 |           | 4  | A, 0.3763    | AA/GA/GG | 113/336/297 | 132.17/137.53/138    | 26.07/27.56/28.72 | -0.7661 | 0.4801 | 0.1109        | 0.5748 |
| p58514         | rs838905    | 125291006 | Intron 7 |           | 4  | C, 0.4329    | CC/TC/TT | 149/352/250 | 134.23/138.05/137.42 | 26.43/27.51/28.81 | -0.4213 | 0.4644 | 0.3646        | 0.7761 |

|                |            |           |                          |           |              |           |             |                      |                     |                   |        |               |               |        |
|----------------|------------|-----------|--------------------------|-----------|--------------|-----------|-------------|----------------------|---------------------|-------------------|--------|---------------|---------------|--------|
| p58664         | rs865716   | 125290856 | Intron 7                 | 5         | T, 0.2708    | AA/AT/TT  | 395/272/63  | 136.68/135.18/144.1  | 28.06/26.58/28.78   | 0.5369            | 0.5185 | 0.3008        | 0.7761        |        |
| p60255         | rs3782287  | 125289265 | Intron 7                 | 5         | T, 0.2831    | CC/CT/TT  | 384/314/55  | 136.2/136.74/139.92  | 26.41/28.49/33.12   | 0.3715            | 0.5324 | 0.4856        | 0.8255        |        |
| p61872         | rs838909   | 125287648 | Intron 7                 | 4         | T, 0.2199    | CC/CT/TT  | 453/251/36  | 135.22/138.63/139.38 | 27.18/28.46/28.12   | 0.9232            | 0.5699 | 0.1056        | 0.5748        |        |
| p62140         | rs838910   | 125287380 | Intron 7                 | 5         | T, 0.3047    | GG/GT/TT  | 358/304/72  | 135.54/139.34/130.23 | 27.71/28.09/24.10   | -0.0755           | 0.5087 | 0.8821        | 0.9654        |        |
| p62409         | rs838911   | 125287111 | Intron 7                 | 5         | T, 0.4211    | CC/CT/TT  | 251/346/135 | 137.46/138/132.71    | 28.39/28.04/25.39   | -0.6245           | 0.4748 | 0.1888        | 0.6940        |        |
| p62615         | rs7138386  | 125286905 | Intron 7                 | 5         | C, 0.1137    | TT/TC/CC  | 571/141/11  | 137.41/132.86/147.97 | 27.69/26.95/32.74   | -0.6495           | 0.7473 | 0.3851        | 0.7761        |        |
| p63483         | rs838912   | 125286037 | Intron 7                 | 7         | A, 0.0867    | AA/GA/GG  | 6/119/624   | 147.92/141.68/136.06 | 22.36/28.42/27.33   | 1.8700            | 0.8230 | <b>0.0234</b> | 0.3972        |        |
| p64772         | rs5888     | 125284748 | Exon 8                   | Ala350Ala | 3a           | T, 0.0961 | CC/CT/TT    | 614/130/8            | 135.6/141.63/150.76 | 27.57/28.87/21.81 | 2.0962 | 0.7888        | <b>0.0080</b> | 0.2918 |
| p64923         | rs838915   | 125284597 | Intron 8                 | 5         | A, 0.1435    | AA/CA/CC  | 19/179/547  | 128.24/137.41/136.97 | 24.55/26.33/28.38   | -0.3684           | 0.6595 | 0.5766        | 0.8571        |        |
| p65999         | rs12819677 | 125283521 | Intron 8                 | 6         | A, 0.2813    | GG/GA/AA  | 375/309/52  | 135.65/137.67/140.14 | 26.43/28.07/31.39   | 0.6769            | 0.5339 | 0.2052        | 0.7157        |        |
| p67439         | rs961170   | 125282081 | Intron 8                 | 4         | A, 0.0893    | AA/GA/GG  | 11/108/615  | 127.38/135.18/137.19 | 30.33/28.13/27.62   | -0.9808           | 0.8009 | 0.2211        | 0.7435        |        |
| p67700         | rs1726374  | 125281820 | Intron 8                 | 7         | A, 0.1933    | GG/GA/AA  | 500/226/32  | 136.28/137.42/137.84 | 27.77/28.32/24.61   | 0.3249            | 0.5867 | 0.5798        | 0.8571        |        |
| p69013         | rs7135117  | 125280507 | Intron 8                 | 7         | G, 0.2901    | GG/AG/AA  | 74/275/383  | 139.15/137.26/135.9  | 27.28/28.32/27.33   | 0.5010            | 0.5031 | 0.3196        | 0.7761        |        |
| p69699         | rs10396210 | 125279821 | Intron 8-<br>splice site | 4         | A, 0.1511    | AA/GA/GG  | 17/188/527  | 133.13/133.32/138.01 | 24.50/25.99/28.45   | -1.2921           | 0.6639 | 0.0520        | 0.5052        |        |
| p69995<br>delC | rs5801571  | 125279525 | Intron 9                 | 5         | delC, 0.2761 | DD/WD/WW  | 63/282/394  | 138.36/136.65/136.08 | 29.51/27.84/27.69   | 0.2920            | 0.5230 | 0.5768        | 0.8571        |        |
| p71867         | rs7954022  | 125277653 | Intron 9                 | 5         | T, 0.1323    | TT/CT/CC  | 12/172/556  | 138.36/139.03/136.02 | 28.42/27.41/27.66   | 0.8502            | 0.6988 | 0.2241        | 0.7435        |        |
| p72197         | rs838861   | 125277323 | Intron 9                 | 7         | G, 0.3777    | AA/AG/GG  | 304/310/122 | 138.19/135.01/138.6  | 28.51/26.54/28.32   | -0.1507           | 0.4657 | 0.7464        | 0.9144        |        |
| p72777         | rs838862   | 125276743 | Intron 9                 | 5         | T, 0.0887    | CC/CT/TT  | 611/116/7   | 136.49/140.05/130.13 | 27.50/27.25/33.12   | 0.7012            | 0.8218 | 0.3938        | 0.7762        |        |
| p75766         | rs838866   | 125273754 | Intron 9                 | 6         | C, 0.2116    | TT/TC/CC  | 466/240/37  | 136.81/137.6/134.32  | 27.72/27.49/29.38   | -0.0497           | 0.5699 | 0.9306        | 0.9887        |        |
| p75778         | rs7301120  | 125273742 | Intron 9                 | 6         | T, 0.1135    | TT/CT/CC  | 9/146/569   | 153.8/135.98/136.84  | 34.57/28.15/27.34   | 0.3767            | 0.7539 | 0.6174        | 0.8839        |        |
| p76757         | rs9919713  | 125272763 | Intron 9                 | 6         | T, 0.4390    | AA/AT/TT  | 243/353/148 | 137.25/137.33/135.86 | 29.00/27.02/27.54   | -0.1860           | 0.4696 | 0.6921        | 0.9051        |        |
| p77251         | rs34339961 | 125272269 | Intron 9                 | 6         | T, 0.1177    | AA/AT/TT  | 573/150/11  | 136.68/136.84/153.06 | 27.85/28.26/33.32   | 0.7120            | 0.7432 | 0.3383        | 0.7761        |        |
| p77842         | rs2272310  | 125271678 | Intron 10                | 5         | A, 0.0807    | AA/GA/GG  | 5/110/642   | 136.12/139.14/136.1  | 4.96/29.15/27.59    | 0.8339            | 0.8661 | 0.3359        | 0.7761        |        |
| p78402         | rs838898   | 125271118 | Intron 10                | 5         | A, 0.0714    | AA/GA/GG  | 7/86/601    | 124.15/135.76/137.49 | 33.52/24.94/28.40   | -0.9806           | 0.9240 | 0.2889        | 0.7761        |        |
| p78430         | rs838897   | 125271090 | Intron 10                | 5         | G, 0.3830    | GG/CG/CC  | 121/315/299 | 135.15/137.21/136.75 | 28.01/28.01/27.48   | -0.1887           | 0.4709 | 0.6887        | 0.9051        |        |
| p78747         | rs2293440  | 125270773 | Intron 11                | 5         | C, 0.4112    | CC/TC/TT  | 126/348/258 | 136.06/136.3/137.79  | 27.37/26.42/29.64   | -0.2984           | 0.4810 | 0.5352        | 0.8490        |        |
| p79721         | rs838896   | 125269799 | Intron 11                | 5         | C, 0.3104    | GG/GC/CC  | 357/324/71  | 135.09/137.26/143.1  | 28.43/26.98/24.61   | 1.1147            | 0.5056 | <b>0.0278</b> | 0.4197        |        |
| p79828         | rs838895   | 125269692 | Intron 11                | 5         | G, 0.3171    | GG/CG/CC  | 73/325/345  | 142.03/137.79/134.49 | 25.40/26.62/28.83   | 1.2206            | 0.5074 | <b>0.0164</b> | 0.3186        |        |
| p80045         | rs838893   | 125269475 | Intron 11                | 5         | A, 0.3244    | GG/GA/AA  | 344/328/80  | 135.11/137.56/140.43 | 29.04/26.78/25.93   | 0.8859            | 0.5009 | 0.0774        | 0.5540        |        |
| p83547         | rs838887   | 125265973 | Intron 12                | 5         | G, 0.4564    | CC/CG/GG  | 227/358/157 | 136.15/137.97/135.3  | 25.51/27.56/30.61   | -0.1113           | 0.4676 | 0.8119        | 0.9518        |        |
| p83884         | rs701106   | 125265636 | Intron 12                | 5         | T, 0.2597    | TT/CT/CC  | 51/291/412  | 142.85/138.67/134.71 | 28.78/29.50/26.27   | 1.2967            | 0.5352 | <b>0.0156</b> | 0.3186        |        |

|                              |             |           |                |                          |    |              |          |            |                      |                   |         |        |               |        |
|------------------------------|-------------|-----------|----------------|--------------------------|----|--------------|----------|------------|----------------------|-------------------|---------|--------|---------------|--------|
| p86276                       | rs747155    | 125263244 | Intron 12      | Gly499Arg<br>(isoform 2) | 2b | T, 0.1495    | TT/CT/CC | 17/191/541 | 131.8/136.97/136.81  | 35.42/26.39/28.03 | -0.2164 | 0.6605 | 0.7433        | 0.9144 |
| p86481                       | rs701103    | 125263039 | Exon 13-3' UTR |                          | 5  | A, 0.2451    | AA/GA/GG | 50/265/428 | 132.37/138.77/136.53 | 27.64/27.23/28.05 | -0.0074 | 0.5400 | 0.9891        | 0.9965 |
| p87011                       | rs58032386  | 125262509 | Exon 13-3' UTR |                          | 2a | T, 0.1417    | CC/CT/TT | 551/186/14 | 137.07/137/129.91    | 28.90/24.33/24.12 | -0.2769 | 0.6776 | 0.6829        | 0.9051 |
| p87723                       | rs838881    | 125261797 | 3' flanking    |                          | 6  | T, 0.3183    | TT/CT/CC | 65/344/338 | 134.34/137.04/136.76 | 28.25/27.36/28.31 | -0.1897 | 0.5263 | 0.7187        | 0.9136 |
| p87749                       | rs76465225  | 125261771 | 3' flanking    |                          | 7  | A, 0.0844    | AA/GA/GG | 7/111/629  | 128.6/137.32/136.7   | 23.34/27.81/27.96 | -0.1205 | 0.8434 | 0.8865        | 0.9654 |
| p87927                       | rs838880    | 125261593 | 3' flanking    |                          | 5  | A, 0.2414    | AA/GA/GG | 40/280/423 | 134.92/136.85/137.12 | 29.87/27.16/28.26 | -0.2130 | 0.5636 | 0.7056        | 0.9136 |
| <b>MAF between 1-5%</b>      |             |           |                |                          |    |              |          |            |                      |                   |         |        |               |        |
| p1316                        | rs10396208  | 125348204 | Exon 1         | Cys21Cys                 | 2b | T, 0.0476    | CC/CT/TT | 657/60/4   | 136.18/145.72/126.27 | 27.33/32.28/23.99 | 2.0253  | 1.0962 | 0.0651        | 0.5206 |
| p1419                        | rs201717369 | 125348101 | Intron 1       |                          | 4  | A, 0.0121    | GA/GG    | 15/713     | 143.53/136.72        | 33.66/27.75       | 2.1508  | 2.3880 | 0.3681        | 0.7761 |
| p7650                        | rs11615630  | 125341870 | Intron 1       |                          | 5  | A, 0.0436    | GG/GA    | 695/68     | 137.43/130.27        | 27.44/30.31       | -2.4339 | 1.1578 | <b>0.0359</b> | 0.4359 |
| p45627                       | rs12297372  | 125303893 | Intron 1       |                          | 5  | G, 0.0487    | GG/AG/AA | 1/71/661   | 132.07/139.72/136.41 | NA/29.73/27.51    | 0.9720  | 1.1101 | 0.3816        | 0.7761 |
| p46964                       | rs114061302 | 125302556 | Intron 1       |                          | 4  | A, 0.0388    | AA/GA/GG | 1/58/696   | 92.79/139.86/136.49  | NA/31.62/27.47    | 0.4839  | 1.2105 | 0.6895        | 0.9051 |
| p50118                       | rs58710319  | 125299402 | Intron 3       |                          | 5  | T, 0.0208    | CT/CC    | 32/719     | 146.19/136.45        | 32.51/27.51       | 3.1376  | 1.6463 | 0.0571        | 0.5173 |
| p50380                       | rs141748317 | 125299140 | Intron 3       |                          | 2b | G, 0.0112    | AA/AG    | 727/17     | 136.64/137.87        | 27.67/30.07       | 0.3920  | 2.2372 | 0.8609        | 0.9654 |
| p50489                       | rs61320152  | 125299031 | Intron 3       |                          | 4  | T, 0.0257    | GG/GT    | 704/39     | 136.63/143.42        | 27.39/31.34       | 2.1813  | 1.4908 | 0.1439        | 0.6311 |
| p54445                       | rs60910935  | 125295075 | Intron 5       |                          | 4  | G, 0.0418    | AA/AG/GG | 656/57/2   | 137.28/132.79/148.43 | 28.47/22.46/21.21 | -0.9880 | 1.1918 | 0.4074        | 0.7915 |
| p54475                       | rs60227139  | 125295045 | Intron 5       |                          | 4  | T, 0.0437    | CC/CT/TT | 676/61/2   | 137.11/133.52/148.4  | 28.23/22.68/21.21 | -0.7550 | 1.1492 | 0.5114        | 0.8404 |
| p77682                       | rs150082885 | 125271838 | Intron 10      |                          | 5  | G, 0.0106    | AA/AG/GG | 721/14/1   | 137.13/122.98/156.01 | 27.77/29.30/NA    | -2.9877 | 2.1744 | 0.1698        | 0.6416 |
| p78791                       | rs75289200  | 125270729 | Intron 11      |                          | 5  | C, 0.0321    | TC/TT    | 46/685     | 147.19/136.06        | 27.99/27.68       | 3.6568  | 1.3876 | <b>0.0086</b> | 0.2918 |
| p82019                       | rs838890    | 125267501 | Intron 11      |                          | 5  | T, 0.0320    | CC/CT/TT | 690/41/2   | 137.12/135.58/112.02 | 27.74/28.19/72.83 | -1.1864 | 1.3456 | 0.3782        | 0.7761 |
| p82340                       | rs77483223  | 125267180 | Intron 12      |                          | 5  | A, 0.0231    | GA/GG    | 35/705     | 132.2/137.01         | 25.03/27.96       | -1.5601 | 1.5901 | 0.3268        | 0.7761 |
| p82434                       | rs838889    | 125267086 | Intron 12      |                          | 5  | C, 0.0315    | CC/TC/TT | 2/41/702   | 112.08/136.37/136.99 | 72.83/26.99/27.63 | -0.9096 | 1.3374 | 0.4967        | 0.8339 |
| p86245                       | rs188375019 | 125263275 | Intron 12      |                          | 4  | T, 0.0341    | CC/CT    | 696/50     | 136.54/142.03        | 27.69/26.72       | 1.8399  | 1.3314 | 0.1674        | 0.6416 |
| p86316                       | rs701104    | 125263204 | Intron 12      |                          | 4  | T, 0.0487    | TT/GT/GG | 2/64/658   | 128.07/135.86/137.43 | 50.49/29.05/27.70 | -0.6627 | 1.1303 | 0.5579        | 0.8571 |
| p86967                       | rs187492239 | 125262553 | Exon 13-3' UTR |                          | 4  | G, 0.0355    | AA/AG    | 692/52     | 136.5/140.59         | 27.82/26.49       | 1.3818  | 1.3114 | 0.2924        | 0.7761 |
| p87611                       | rs190688220 | 125261909 | 3' flanking    |                          | 4  | T, 0.0316    | CC/CT    | 697/46     | 136.41/141.77        | 27.77/27.47       | 1.7851  | 1.3894 | 0.1993        | 0.7132 |
| p87681                       | rs838883    | 125261839 | 3' flanking    |                          | 5  | A, 0.0459    | AA/GA/GG | 1/62/659   | 163.53/136.09/137.17 | NA/28.31/27.91    | -0.0535 | 1.1812 | 0.9639        | 0.9931 |
| <b>MAF ≤1%</b>               |             |           |                |                          |    |              |          |            |                      |                   |         |        |               |        |
| p1048<br>insC<br>(1048_1049) |             | 125348472 | Exon 1-5' UTR  |                          | 2a | insC, 0.0079 | WI/WW    | 12/729     | 134.79/136.97        | 31.94/27.67       | -0.7733 | 2.6557 | 0.7710        | 0.9144 |
| p49759                       | rs146272788 | 125299761 | Intron 2       |                          | 5  | T, 0.0020    | CC/CT    | 731/3      | 137.03/141.39        | 27.75/17.56       | 1.5883  | 5.2643 | 0.7630        | 0.9144 |

|        |             |           |                                 |           |   |           |       |        |               |             |          |        |               |        |
|--------|-------------|-----------|---------------------------------|-----------|---|-----------|-------|--------|---------------|-------------|----------|--------|---------------|--------|
| p49978 | rs5891      | 125299542 | Exon 3                          | Val135Ile | 5 | A, 0.0058 | GA/GG | 9/754  | 154.31/136.52 | 39.14/27.50 | 5.6762   | 3.0464 | 0.0628        | 0.5206 |
| p50024 | rs368880622 | 125299496 | Intron 3                        |           | 5 | T, 0.0026 | GG/GT | 742/4  | 136.83/142.91 | 27.51/57.60 | 1.6012   | 4.5586 | 0.7255        | 0.9136 |
| p50954 |             | 125298566 | Intron 4                        |           | 5 | C, 0.0007 | TC/TT | 1/742  | 110.14/136.79 | NA/27.75    | -8.7626  | 9.1297 | 0.3375        | 0.7761 |
| p52919 |             | 125296601 | Intron 4                        |           | 5 | T, 0.0013 | GG/GT | 741/2  | 136.81/97.42  | 27.74/18.38 | -13.4137 | 6.4689 | <b>0.0385</b> | 0.4359 |
| p52995 | rs113910315 | 125296525 | Intron 4-<br>splice site        |           | 5 | G, 0.0020 | TG/TT | 3/746  | 138.8/136.77  | 34.93/27.70 | 0.6563   | 5.2739 | 0.9010        | 0.9725 |
| p53372 | rs115604379 | 125296148 | Intron 5                        |           | 5 | T, 0.0066 | CC/CT | 735/10 | 136.57/149.32 | 27.83/17.13 | 4.3130   | 2.9092 | 0.1386        | 0.6311 |
| p54611 |             | 125294909 | Intron 5                        |           | 4 | C, 0.0007 | TC/TT | 1/748  | 80.62/136.83  | NA/27.66    | -19.2831 | 9.0970 | <b>0.0344</b> | 0.4359 |
| p54627 |             | 125294893 | Intron 5                        |           | 4 | C, 0.0020 | GC/GG | 3/744  | 147.45/136.54 | 23.34/27.76 | 3.6910   | 5.2836 | 0.4850        | 0.8255 |
| p54856 |             | 125294664 | Intron 6                        |           | 4 | T, 0.0007 | CC/CT | 748/1  | 136.87/67.98  | 27.61/NA    | -24.0757 | 9.0781 | <b>0.0082</b> | 0.2918 |
| p57004 | rs187562853 | 125292516 | Intron 6                        |           | 4 | A, 0.0098 | GG/GA | 731/15 | 136.33/146.22 | 27.82/26.41 | 3.2853   | 2.3865 | 0.1690        | 0.6416 |
| p77181 | rs146246031 | 125272339 | Intron 9                        |           | 7 | C, 0.0053 | TC/TT | 8/734  | 138.87/137.05 | 40.35/27.46 | 0.4564   | 3.2210 | 0.8874        | 0.9654 |
| p77381 | rs138499966 | 125272139 | Intron 9                        |           | 6 | C, 0.0046 | TC/TT | 7/741  | 135.79/136.78 | 22.32/27.79 | -0.2236  | 3.4610 | 0.9485        | 0.9923 |
| p77620 | rs377124254 | 125271900 | Intron 10                       |           | 5 | A, 0.0007 | GA/GG | 1/741  | 181.07/136.69 | NA/27.81    | 14.4685  | 9.1465 | 0.1141        | 0.5748 |
| p77704 |             | 125271816 | Intron 10                       |           | 5 | A, 0.0040 | CA/CC | 6/731  | 127.91/136.87 | 31.82/27.82 | -3.0744  | 3.7716 | 0.4152        | 0.7954 |
| p78255 | rs184052375 | 125271265 | Intron 10                       |           | 4 | G, 0.0072 | AA/AG | 740/9  | 136.63/147.01 | 27.63/34.72 | 3.3097   | 3.0552 | 0.2790        | 0.7761 |
| p81863 | rs185445624 | 125267657 | Intron 11                       |           | 5 | A, 0.0020 | GA/GG | 3/745  | 129.03/136.84 | 26.05/27.73 | -2.5166  | 5.2725 | 0.6333        | 0.8972 |
| p82264 | rs141545424 | 125267256 | Exon 12                         | Gly501Gly | 5 | A, 0.0007 | CA/CC | 1/745  | 181.22/136.74 | NA/27.71    | 14.4986  | 9.1095 | 0.1119        | 0.5748 |
| p82369 | rs75446635  | 125267151 | Intron 12                       |           | 5 | A, 0.0059 | GA/GG | 9/739  | 144.2/136.77  | 41.63/27.47 | 2.2239   | 3.0489 | 0.4660        | 0.8230 |
| p87266 | rs150512235 | 125262254 | Exon 13-<br>3' UTR <sup>f</sup> |           | 4 | C, 0.0057 | TC/TT | 9/756  | 137.13/136.56 | 38.11/27.67 | 0.0318   | 3.0667 | 0.9917        | 0.9965 |
| p87694 |             | 125261826 | 3' flanking                     |           | 5 | T, 0.0020 | CC/CT | 731/3  | 136.86/145.93 | 27.92/24.62 | 3.0751   | 5.3006 | 0.5620        | 0.8571 |

ApoA-I, apolipoprotein A-I; del/D, deletion; FDR, false discovery rate; ins/I, insertion; MA, minor allele; MAF, minor allele frequency; NA, not analyzed; RegDB, RegulomeDB score; SD, standard deviation; SE, standard error; SNP, single nucleotide polymorphism; UTR, untranslated region; W, wild type allele for insertion or deletion on RefSeq.

All alleles on the reverse strand. Splice site is defined as  $\pm 20$  bp from the start or end of an exon.

All 10 novel variants identified in this study have been submitted to dbSNP database (batch ID: SCARB1\_AB): [http://www.ncbi.nlm.nih.gov/SNP/snp\\_viewTable.cgi?handle=KAMBOH](http://www.ncbi.nlm.nih.gov/SNP/snp_viewTable.cgi?handle=KAMBOH).

ApoA-I values were Box-Cox transformed. Results were adjusted for covariates: sex and age.

Nominally significant *P*-values ( $P < 0.05$ ) and FDR values that passed the threshold (FDR  $< 0.20$ ) are shown in **bold**.

<sup>a, c</sup> RefSeq of SCARB1: hg19, NM\_005505 (CHIP Bioinformatics).

<sup>b</sup> dbSNP build 139: GRCh37.p10.

<sup>d</sup> The RegulomeDB (version 1.0) scoring scheme is described at the footnote of Additional file 4 Table S4 or can be seen at <http://regulome.stanford.edu/help>.

<sup>e</sup> Corresponding to a *q*-value from Benjamini-Hochberg procedure.

<sup>f</sup> Close to a miRNA-145 seed site based on TargetScanHuman (version 6.2, <http://www.targetscan.org/>).
