# Supplementary material for: Genetic contribution of SCARB1 variants to lipid traits in African Blacks: a candidate gene association study
Source: Springer Nature journal article supplement (doi:10.1186/s12881-015-0250-6), 2015-11-12
Supplement: MOESM16 [file 9741426]

**Table S11. Haplotype association results for 136 SCARB1 genotyped variants for HDL-C and ApoA-I.**

| wind | wind SNP | SNP Name <sup>a</sup> -SNP ID <sup>b</sup><br>/Chr12 Position <sup>c</sup> | Location          | MA, MAF         | Genotype | HDL-C          |         |               |          | ApoA-I         |         |               |          |
|------|----------|----------------------------------------------------------------------------|-------------------|-----------------|----------|----------------|---------|---------------|----------|----------------|---------|---------------|----------|
|      |          |                                                                            |                   |                 |          | Genotype Count | $\beta$ | Single-site P | Global P | Genotype Count | $\beta$ | Single-site P | Global P |
| 1    | SNP 1    | p1048insC-<br>chr12_125348472                                              | Exon 1-<br>5' UTR | insC,<br>0.0079 | WII/WWW  | 12/723         | -0.9389 | 0.3785        | 0.3506   | 12/729         | -0.7733 | 0.7710        | 0.1160   |
| 1    | SNP 2    | p1265-rs2070242                                                            | Exon 1            | T, 0.1284       | CC/CT/TT | 541/163/10     | -0.5040 | 0.0833        |          | 545/165/10     | -1.2535 | 0.0862        |          |
| 1    | SNP 3    | p1316-rs10396208                                                           | Exon 1            | T, 0.0476       | CC/CT/TT | 652/58/4       | 0.2987  | 0.5001        |          | 657/60/4       | 2.0253  | 0.0651        |          |
| 1    | SNP 4    | p1419-rs201717369                                                          | Intron 1          | A, 0.0121       | AA/GA/GG | 1/14/707       | 0.4892  | 0.5748        |          | 0/15/713       | 2.1508  | 0.3681        |          |
| 2    | SNP 1    | p1265-rs2070242                                                            | Exon 1            | T, 0.1284       | CC/CT/TT | 541/163/10     | -0.5040 | 0.0833        | 0.6456   | 545/165/10     | -1.2535 | 0.0862        | 0.1454   |
| 2    | SNP 2    | p1316-rs10396208                                                           | Exon 1            | T, 0.0476       | CC/CT/TT | 652/58/4       | 0.2987  | 0.5001        |          | 657/60/4       | 2.0253  | 0.0651        |          |
| 2    | SNP 3    | p1419-rs201717369                                                          | Intron 1          | A, 0.0121       | AA/GA/GG | 1/14/707       | 0.4892  | 0.5748        |          | 0/15/713       | 2.1508  | 0.3681        |          |
| 2    | SNP 4    | p4012-rs7139401                                                            | Intron 1          | C, 0.4386       | TT/TC/CC | 232/343/147    | 0.0877  | 0.6453        |          | 236/350/148    | -0.0802 | 0.8654        |          |
| 3    | SNP 1    | p1316-rs10396208                                                           | Exon 1            | T, 0.0476       | CC/CT/TT | 652/58/4       | 0.2987  | 0.5001        | 0.8268   | 657/60/4       | 2.0253  | 0.0651        | 0.2992   |
| 3    | SNP 2    | p1419-rs201717369                                                          | Intron 1          | A, 0.0121       | AA/GA/GG | 1/14/707       | 0.4892  | 0.5748        |          | 0/15/713       | 2.1508  | 0.3681        |          |
| 3    | SNP 3    | p4012-rs7139401                                                            | Intron 1          | C, 0.4386       | TT/TC/CC | 232/343/147    | 0.0877  | 0.6453        |          | 236/350/148    | -0.0802 | 0.8654        |          |
| 3    | SNP 4    | p5055-rs11057869                                                           | Intron 1          | A, 0.074        | AA/GA/GG | 7/96/638       | 0.0976  | 0.7828        |          | 7/95/650       | 0.5638  | 0.5247        |          |
| 4    | SNP 1    | p1419-rs201717369                                                          | Intron 1          | A, 0.0121       | AA/GA/GG | 1/14/707       | 0.4892  | 0.5748        | 0.6474   | 0/15/713       | 2.1508  | 0.3681        | 0.7873   |
| 4    | SNP 2    | p4012-rs7139401                                                            | Intron 1          | C, 0.4386       | TT/TC/CC | 232/343/147    | 0.0877  | 0.6453        |          | 236/350/148    | -0.0802 | 0.8654        |          |
| 4    | SNP 3    | p5055-rs11057869                                                           | Intron 1          | A, 0.074        | AA/GA/GG | 7/96/638       | 0.0976  | 0.7828        |          | 7/95/650       | 0.5638  | 0.5247        |          |
| 4    | SNP 4    | p6600-rs12831105                                                           | Intron 1          | T, 0.1188       | CC/CT/TT | 566/151/11     | 0.3570  | 0.2239        |          | 571/152/10     | -0.5681 | 0.4412        |          |
| 5    | SNP 1    | p4012-rs7139401                                                            | Intron 1          | C, 0.4386       | TT/TC/CC | 232/343/147    | 0.0877  | 0.6453        | 0.6759   | 236/350/148    | -0.0802 | 0.8654        | 0.2798   |
| 5    | SNP 2    | p5055-rs11057869                                                           | Intron 1          | A, 0.074        | AA/GA/GG | 7/96/638       | 0.0976  | 0.7828        |          | 7/95/650       | 0.5638  | 0.5247        |          |
| 5    | SNP 3    | p6600-rs12831105                                                           | Intron 1          | T, 0.1188       | CC/CT/TT | 566/151/11     | 0.3570  | 0.2239        |          | 571/152/10     | -0.5681 | 0.4412        |          |
| 5    | SNP 4    | p7650-rs11615630                                                           | Intron 1          | A, 0.0436       | GG/GA    | 685/67         | 0.3382  | 0.4702        |          | 695/68         | -2.4339 | 0.0359        |          |
| 6    | SNP 1    | p5055-rs11057869                                                           | Intron 1          | A, 0.074        | AA/GA/GG | 7/96/638       | 0.0976  | 0.7828        | 0.7353   | 7/95/650       | 0.5638  | 0.5247        | 0.3274   |
| 6    | SNP 2    | p6600-rs12831105                                                           | Intron 1          | T, 0.1188       | CC/CT/TT | 566/151/11     | 0.3570  | 0.2239        |          | 571/152/10     | -0.5681 | 0.4412        |          |
| 6    | SNP 3    | p7650-rs11615630                                                           | Intron 1          | A, 0.0436       | GG/GA    | 685/67         | 0.3382  | 0.4702        |          | 695/68         | -2.4339 | 0.0359        |          |
| 6    | SNP 4    | p10292-rs4765181                                                           | Intron 1          | T, 0.249        | TT/GT/GG | 44/285/417     | 0.1348  | 0.5405        |          | 44/287/426     | -0.0286 | 0.9583        |          |
| 7    | SNP 1    | p6600-rs12831105                                                           | Intron 1          | T, 0.1188       | CC/CT/TT | 566/151/11     | 0.3570  | 0.2239        | 0.4139   | 571/152/10     | -0.5681 | 0.4412        | 0.1691   |
| 7    | SNP 2    | p7650-rs11615630                                                           | Intron 1          | A, 0.0436       | GG/GA    | 685/67         | 0.3382  | 0.4702        |          | 695/68         | -2.4339 | 0.0359        |          |
| 7    | SNP 3    | p10292-rs4765181                                                           | Intron 1          | T, 0.249        | TT/GT/GG | 44/285/417     | 0.1348  | 0.5405        |          | 44/287/426     | -0.0286 | 0.9583        |          |
| 7    | SNP 4    | p10991-rs10773112                                                          | Intron 1          | A, 0.3534       | GG/GA/AA | 303/341/89     | 0.2146  | 0.2860        |          | 309/339/90     | 0.4896  | 0.3230        |          |
| 8    | SNP 1    | p7650-rs11615630                                                           | Intron 1          | A, 0.0436       | GG/GA    | 685/67         | 0.3382  | 0.4702        | 0.2071   | 695/68         | -2.4339 | 0.0359        | 0.1742   |
| 8    | SNP 2    | p10292-rs4765181                                                           | Intron 1          | T, 0.249        | TT/GT/GG | 44/285/417     | 0.1348  | 0.5405        |          | 44/287/426     | -0.0286 | 0.9583        |          |
| 8    | SNP 3    | p10991-rs10773112                                                          | Intron 1          | A, 0.3534       | GG/GA/AA | 303/341/89     | 0.2146  | 0.2860        |          | 309/339/90     | 0.4896  | 0.3230        |          |
| 8    | SNP 4    | p13570-rs11057864                                                          | Intron 1          | T, 0.118        | TT/GT/GG | 14/147/581     | -0.0393 | 0.8917        |          | 15/147/591     | 0.3006  | 0.6725        |          |
| 9    | SNP 1    | p10292-rs4765181                                                           | Intron 1          | T, 0.249        | TT/GT/GG | 44/285/417     | 0.1348  | 0.5405        | 0.6128   | 44/287/426     | -0.0286 | 0.9583        | 0.5689   |
| 9    | SNP 2    | p10991-rs10773112                                                          | Intron 1          | A, 0.3534       | GG/GA/AA | 303/341/89     | 0.2146  | 0.2860        |          | 309/339/90     | 0.4896  | 0.3230        |          |
| 9    | SNP 3    | p13570-rs11057864                                                          | Intron 1          | T, 0.118        | TT/GT/GG | 14/147/581     | -0.0393 | 0.8917        |          | 15/147/591     | 0.3006  | 0.6725        |          |
| 9    | SNP 4    | p16565-rs10773111                                                          | Intron 1          | A, 0.1928       | GG/GA/AA | 481/239/24     | 0.1089  | 0.6550        |          | 486/246/23     | 0.4484  | 0.4608        |          |
| 10   | SNP 1    | p10991-rs10773112                                                          | Intron 1          | A, 0.3534       | GG/GA/AA | 303/341/89     | 0.2146  | 0.2860        | 0.5086   | 309/339/90     | 0.4896  | 0.3230        | 0.8093   |
| 10   | SNP 2    | p13570-rs11057864                                                          | Intron 1          | T, 0.118        | TT/GT/GG | 14/147/581     | -0.0393 | 0.8917        |          | 15/147/591     | 0.3006  | 0.6725        |          |
| 10   | SNP 3    | p16565-rs10773111                                                          | Intron 1          | A, 0.1928       | GG/GA/AA | 481/239/24     | 0.1089  | 0.6550        |          | 486/246/23     | 0.4484  | 0.4608        |          |
| 10   | SNP 4    | p20207-rs11057853                                                          | Intron 1          | A, 0.4484       | AA/GA/GG | 150/360/228    | 0.4082  | 0.0343        |          | 153/366/230    | 0.8422  | 0.0751        |          |
| 11   | SNP 1    | p13570-rs11057864                                                          | Intron 1          | T, 0.118        | TT/GT/GG | 14/147/581     | -0.0393 | 0.8917        | 0.4147   | 15/147/591     | 0.3006  | 0.6725        | 0.4335   |
| 11   | SNP 2    | p16565-rs10773111                                                          | Intron 1          | A, 0.1928       | GG/GA/AA | 481/239/24     | 0.1089  | 0.6550        |          | 486/246/23     | 0.4484  | 0.4608        |          |
| 11   | SNP 3    | p20207-rs11057853                                                          | Intron 1          | A, 0.4484       | AA/GA/GG | 150/360/228    | 0.4082  | 0.0343        |          | 153/366/230    | 0.8422  | 0.0751        |          |
| 11   | SNP 4    | p20694-rs11057852                                                          | Intron 1          | A, 0.105        | GG/GA/AA | 581/130/11     | -0.0308 | 0.9198        |          | 587/129/11     | 0.3519  | 0.6452        |          |
| 12   | SNP 1    | p16565-rs10773111                                                          | Intron 1          | A, 0.1928       | GG/GA/AA | 481/239/24     | 0.1089  | 0.6550        | 0.0764   | 486/246/23     | 0.4484  | 0.4608        | 0.2988   |
| 12   | SNP 2    | p20207-rs11057853                                                          | Intron 1          | A, 0.4484       | AA/GA/GG | 150/360/228    | 0.4082  | 0.0343        |          | 153/366/230    | 0.8422  | 0.0751        |          |
| 12   | SNP 3    | p20694-rs11057852                                                          | Intron 1          | A, 0.105        | GG/GA/AA | 581/130/11     | -0.0308 | 0.9198        |          | 587/129/11     | 0.3519  | 0.6452        |          |
| 12   | SNP 4    | p20741-rs11057851                                                          | Intron 1          | T, 0.3237       | TT/CT/CC | 72/334/328     | -0.5924 | 0.0043        |          | 73/336/337     | -1.2331 | 0.0162        |          |
| 13   | SNP 1    | p20207-rs11057853                                                          | Intron 1          | A, 0.4484       | AA/GA/GG | 150/360/228    | 0.4082  | 0.0343        | 0.0762   | 153/366/230    | 0.8422  | 0.0751        | 0.0931   |
| 13   | SNP 2    | p20694-rs11057852                                                          | Intron 1          | A, 0.105        | GG/GA/AA | 581/130/11     | -0.0308 | 0.9198        |          | 587/129/11     | 0.3519  | 0.6452        |          |
| 13   | SNP 3    | p20741-rs11057851                                                          | Intron 1          | T, 0.3237       | TT/CT/CC | 72/334/328     | -0.5924 | 0.0043        |          | 73/336/337     | -1.2331 | 0.0162        |          |
| 13   | SNP 4    | p21145-rs3924313                                                           | Intron 1          | T, 0.1772       | CC/CT/TT | 503/219/22     | 0.1488  | 0.5502        |          | 511/221/23     | 0.1215  | 0.8437        |          |

|    |       |                   |          |           |          |             |         |        |        |             |         |        |        |
|----|-------|-------------------|----------|-----------|----------|-------------|---------|--------|--------|-------------|---------|--------|--------|
| 14 | SNP 1 | p20694-rs11057852 | Intron 1 | A, 0.105  | GG/GA/AA | 581/130/11  | -0.0308 | 0.9198 | 0.0886 | 587/129/11  | 0.3519  | 0.6452 | 0.1116 |
| 14 | SNP 2 | p20741-rs11057851 | Intron 1 | T, 0.3237 | TT/CT/CC | 72/334/328  | -0.5924 | 0.0043 |        | 73/336/337  | -1.2331 | 0.0162 |        |
| 14 | SNP 3 | p21145-rs3924313  | Intron 1 | T, 0.1772 | CC/CT/TT | 503/219/22  | 0.1488  | 0.5502 |        | 511/221/23  | 0.1215  | 0.8437 |        |
| 14 | SNP 4 | p22116-rs12370382 | Intron 1 | A, 0.0645 | GG/GA/AA | 643/86/3    | 0.1369  | 0.7300 |        | 650/89/3    | 0.5264  | 0.5882 |        |
| 15 | SNP 1 | p20741-rs11057851 | Intron 1 | T, 0.3237 | TT/CT/CC | 72/334/328  | -0.5924 | 0.0043 | 0.1004 | 73/336/337  | -1.2331 | 0.0162 | 0.1461 |
| 15 | SNP 2 | p21145-rs3924313  | Intron 1 | T, 0.1772 | CC/CT/TT | 503/219/22  | 0.1488  | 0.5502 |        | 511/221/23  | 0.1215  | 0.8437 |        |
| 15 | SNP 3 | p22116-rs12370382 | Intron 1 | A, 0.0645 | GG/GA/AA | 643/86/3    | 0.1369  | 0.7300 |        | 650/89/3    | 0.5264  | 0.5882 |        |
| 15 | SNP 4 | p22168-rs7137797  | Intron 1 | C, 0.3977 | CC/TC/TT | 113/355/259 | 0.2153  | 0.2763 |        | 112/358/262 | 0.5066  | 0.3003 |        |
| 16 | SNP 1 | p21145-rs3924313  | Intron 1 | T, 0.1772 | CC/CT/TT | 503/219/22  | 0.1488  | 0.5502 | 0.4920 | 511/221/23  | 0.1215  | 0.8437 | 0.7203 |
| 16 | SNP 2 | p22116-rs12370382 | Intron 1 | A, 0.0645 | GG/GA/AA | 643/86/3    | 0.1369  | 0.7300 |        | 650/89/3    | 0.5264  | 0.5882 |        |
| 16 | SNP 3 | p22168-rs7137797  | Intron 1 | C, 0.3977 | CC/TC/TT | 113/355/259 | 0.2153  | 0.2763 |        | 112/358/262 | 0.5066  | 0.3003 |        |
| 16 | SNP 4 | p22331-rs6488944  | Intron 1 | G, 0.1474 | TT/TG/GG | 522/188/12  | 0.3091  | 0.2661 |        | 524/191/12  | 0.3684  | 0.5936 |        |
| 17 | SNP 1 | p22116-rs12370382 | Intron 1 | A, 0.0645 | GG/GA/AA | 643/86/3    | 0.1369  | 0.7300 | 0.2834 | 650/89/3    | 0.5264  | 0.5882 | 0.6519 |
| 17 | SNP 2 | p22168-rs7137797  | Intron 1 | C, 0.3977 | CC/TC/TT | 113/355/259 | 0.2153  | 0.2763 |        | 112/358/262 | 0.5066  | 0.3003 |        |
| 17 | SNP 3 | p22331-rs6488944  | Intron 1 | G, 0.1474 | TT/TG/GG | 522/188/12  | 0.3091  | 0.2661 |        | 524/191/12  | 0.3684  | 0.5936 |        |
| 17 | SNP 4 | p22675-rs12425134 | Intron 1 | T, 0.0526 | TT/GT/GG | 2/75/662    | 0.7556  | 0.0738 |        | 2/74/668    | 1.1151  | 0.2900 |        |
| 18 | SNP 1 | p22168-rs7137797  | Intron 1 | C, 0.3977 | CC/TC/TT | 113/355/259 | 0.2153  | 0.2763 | 0.2862 | 112/358/262 | 0.5066  | 0.3003 | 0.7096 |
| 18 | SNP 2 | p22331-rs6488944  | Intron 1 | G, 0.1474 | TT/TG/GG | 522/188/12  | 0.3091  | 0.2661 |        | 524/191/12  | 0.3684  | 0.5936 |        |
| 18 | SNP 3 | p22675-rs12425134 | Intron 1 | T, 0.0526 | TT/GT/GG | 2/75/662    | 0.7556  | 0.0738 |        | 2/74/668    | 1.1151  | 0.2900 |        |
| 18 | SNP 4 | p28137-rs12229555 | Intron 1 | G, 0.3896 | GG/AG/AA | 99/373/257  | -0.3976 | 0.0500 |        | 100/373/265 | -0.5752 | 0.2524 |        |
| 19 | SNP 1 | p22331-rs6488944  | Intron 1 | G, 0.1474 | TT/TG/GG | 522/188/12  | 0.3091  | 0.2661 | 0.1757 | 524/191/12  | 0.3684  | 0.5936 | 0.5933 |
| 19 | SNP 2 | p22675-rs12425134 | Intron 1 | T, 0.0526 | TT/GT/GG | 2/75/662    | 0.7556  | 0.0738 |        | 2/74/668    | 1.1151  | 0.2900 |        |
| 19 | SNP 3 | p28137-rs12229555 | Intron 1 | G, 0.3896 | GG/AG/AA | 99/373/257  | -0.3976 | 0.0500 |        | 100/373/265 | -0.5752 | 0.2524 |        |
| 19 | SNP 4 | p28692-rs4765622  | Intron 1 | T, 0.2565 | TT/CT/CC | 43/289/403  | 0.1962  | 0.3817 |        | 42/298/406  | 0.7871  | 0.1553 |        |
| 20 | SNP 1 | p22675-rs12425134 | Intron 1 | T, 0.0526 | TT/GT/GG | 2/75/662    | 0.7556  | 0.0738 | 0.1080 | 2/74/668    | 1.1151  | 0.2900 | 0.2584 |
| 20 | SNP 2 | p28137-rs12229555 | Intron 1 | G, 0.3896 | GG/AG/AA | 99/373/257  | -0.3976 | 0.0500 |        | 100/373/265 | -0.5752 | 0.2524 |        |
| 20 | SNP 3 | p28692-rs4765622  | Intron 1 | T, 0.2565 | TT/CT/CC | 43/289/403  | 0.1962  | 0.3817 |        | 42/298/406  | 0.7871  | 0.1553 |        |
| 20 | SNP 4 | p28957-rs11057844 | Intron 1 | A, 0.2362 | GG/GA/AA | 428/263/40  | 0.3671  | 0.1075 |        | 433/269/40  | 0.6107  | 0.2781 |        |
| 21 | SNP 1 | p28137-rs12229555 | Intron 1 | G, 0.3896 | GG/AG/AA | 99/373/257  | -0.3976 | 0.0500 | 0.2221 | 100/373/265 | -0.5752 | 0.2524 | 0.2655 |
| 21 | SNP 2 | p28692-rs4765622  | Intron 1 | T, 0.2565 | TT/CT/CC | 43/289/403  | 0.1962  | 0.3817 |        | 42/298/406  | 0.7871  | 0.1553 |        |
| 21 | SNP 3 | p28957-rs11057844 | Intron 1 | A, 0.2362 | GG/GA/AA | 428/263/40  | 0.3671  | 0.1075 |        | 433/269/40  | 0.6107  | 0.2781 |        |
| 21 | SNP 4 | p29749-rs10846751 | Intron 1 | T, 0.4492 | TT/CT/CC | 142/365/210 | -0.3558 | 0.0701 |        | 142/366/215 | -0.7763 | 0.1104 |        |
| 22 | SNP 1 | p28692-rs4765622  | Intron 1 | T, 0.2565 | TT/CT/CC | 43/289/403  | 0.1962  | 0.3817 | 0.1369 | 42/298/406  | 0.7871  | 0.1553 | 0.6135 |
| 22 | SNP 2 | p28957-rs11057844 | Intron 1 | A, 0.2362 | GG/GA/AA | 428/263/40  | 0.3671  | 0.1075 |        | 433/269/40  | 0.6107  | 0.2781 |        |
| 22 | SNP 3 | p29749-rs10846751 | Intron 1 | T, 0.4492 | TT/CT/CC | 142/365/210 | -0.3558 | 0.0701 |        | 142/366/215 | -0.7763 | 0.1104 |        |
| 22 | SNP 4 | p31072-rs10846749 | Intron 1 | G, 0.4461 | CC/CG/GG | 222/366/144 | -0.3792 | 0.0510 |        | 226/371/146 | -0.8005 | 0.0970 |        |
| 23 | SNP 1 | p28957-rs11057844 | Intron 1 | A, 0.2362 | GG/GA/AA | 428/263/40  | 0.3671  | 0.1075 | 0.2085 | 433/269/40  | 0.6107  | 0.2781 | 0.6333 |
| 23 | SNP 2 | p29749-rs10846751 | Intron 1 | T, 0.4492 | TT/CT/CC | 142/365/210 | -0.3558 | 0.0701 |        | 142/366/215 | -0.7763 | 0.1104 |        |
| 23 | SNP 3 | p31072-rs10846749 | Intron 1 | G, 0.4461 | CC/CG/GG | 222/366/144 | -0.3792 | 0.0510 |        | 226/371/146 | -0.8005 | 0.0970 |        |
| 23 | SNP 4 | p31938-rs10744182 | Intron 1 | A, 0.1837 | AA/GA/GG | 25/221/487  | -0.2885 | 0.2438 |        | 25/226/493  | -0.4389 | 0.4748 |        |
| 24 | SNP 1 | p29749-rs10846751 | Intron 1 | T, 0.4492 | TT/CT/CC | 142/365/210 | -0.3558 | 0.0701 | 0.1804 | 142/366/215 | -0.7763 | 0.1104 | 0.5858 |
| 24 | SNP 2 | p31072-rs10846749 | Intron 1 | G, 0.4461 | CC/CG/GG | 222/366/144 | -0.3792 | 0.0510 |        | 226/371/146 | -0.8005 | 0.0970 |        |
| 24 | SNP 3 | p31938-rs10744182 | Intron 1 | A, 0.1837 | AA/GA/GG | 25/221/487  | -0.2885 | 0.2438 |        | 25/226/493  | -0.4389 | 0.4748 |        |
| 24 | SNP 4 | p32129-rs10773107 | Intron 1 | T, 0.1009 | TT/GT/GG | 9/132/593   | -0.3186 | 0.3107 |        | 9/131/605   | 0.8714  | 0.2605 |        |
| 25 | SNP 1 | p31072-rs10846749 | Intron 1 | G, 0.4461 | CC/CG/GG | 222/366/144 | -0.3792 | 0.0510 | 0.1155 | 226/371/146 | -0.8005 | 0.0970 | 0.3437 |
| 25 | SNP 2 | p31938-rs10744182 | Intron 1 | A, 0.1837 | AA/GA/GG | 25/221/487  | -0.2885 | 0.2438 |        | 25/226/493  | -0.4389 | 0.4748 |        |
| 25 | SNP 3 | p32129-rs10773107 | Intron 1 | T, 0.1009 | TT/GT/GG | 9/132/593   | -0.3186 | 0.3107 |        | 9/131/605   | 0.8714  | 0.2605 |        |
| 25 | SNP 4 | p32273-rs12580803 | Intron 1 | C, 0.1006 | TT/TC/CC | 619/114/18  | 0.2010  | 0.4984 |        | 627/117/18  | 1.2550  | 0.0842 |        |
| 26 | SNP 1 | p31938-rs10744182 | Intron 1 | A, 0.1837 | AA/GA/GG | 25/221/487  | -0.2885 | 0.2438 | 0.9308 | 25/226/493  | -0.4389 | 0.4748 | 0.1939 |
| 26 | SNP 2 | p32129-rs10773107 | Intron 1 | T, 0.1009 | TT/GT/GG | 9/132/593   | -0.3186 | 0.3107 |        | 9/131/605   | 0.8714  | 0.2605 |        |
| 26 | SNP 3 | p32273-rs12580803 | Intron 1 | C, 0.1006 | TT/TC/CC | 619/114/18  | 0.2010  | 0.4984 |        | 627/117/18  | 1.2550  | 0.0842 |        |
| 26 | SNP 4 | p32290-rs10744181 | Intron 1 | C, 0.1238 | TT/TC/CC | 547/141/18  | -0.1852 | 0.5162 |        | 551/143/18  | 0.1584  | 0.8211 |        |
| 27 | SNP 1 | p32129-rs10773107 | Intron 1 | T, 0.1009 | TT/GT/GG | 9/132/593   | -0.3186 | 0.3107 | 0.7762 | 9/131/605   | 0.8714  | 0.2605 | 0.5428 |
| 27 | SNP 2 | p32273-rs12580803 | Intron 1 | C, 0.1006 | TT/TC/CC | 619/114/18  | 0.2010  | 0.4984 |        | 627/117/18  | 1.2550  | 0.0842 |        |
| 27 | SNP 3 | p32290-rs10744181 | Intron 1 | C, 0.1238 | TT/TC/CC | 547/141/18  | -0.1852 | 0.5162 |        | 551/143/18  | 0.1584  | 0.8211 |        |
| 27 | SNP 4 | p32395-rs12581963 | Intron 1 | T, 0.1314 | TT/CT/CC | 11/179/557  | -0.3173 | 0.2589 |        | 11/177/570  | -0.6483 | 0.3556 |        |
| 28 | SNP 1 | p32273-rs12580803 | Intron 1 | C, 0.1006 | TT/TC/CC | 619/114/18  | 0.2010  | 0.4984 | 0.6853 | 627/117/18  | 1.2550  | 0.0842 | 0.8033 |
| 28 | SNP 2 | p32290-rs10744181 | Intron 1 | C, 0.1238 | TT/TC/CC | 547/141/18  | -0.1852 | 0.5162 |        | 551/143/18  | 0.1584  | 0.8211 |        |
| 28 | SNP 3 | p32395-rs12581963 | Intron 1 | T, 0.1314 | TT/CT/CC | 11/179/557  | -0.3173 | 0.2589 |        | 11/177/570  | -0.6483 | 0.3556 |        |
| 28 | SNP 4 | p32750-rs7967521  | Intron 1 | G, 0.3425 | GG/AG/AA | 89/306/310  | -0.2137 | 0.2936 |        | 91/304/315  | 0.0564  | 0.9104 |        |
| 29 | SNP 1 | p32290-rs10744181 | Intron 1 | C, 0.1238 | TT/TC/CC | 547/141/18  | -0.1852 | 0.5162 | 0.3363 | 551/143/18  | 0.1584  | 0.8211 | 0.8929 |
| 29 | SNP 2 | p32395-rs12581963 | Intron 1 | T, 0.1314 | TT/CT/CC | 11/179/557  | -0.3173 | 0.2589 |        | 11/177/570  | -0.6483 | 0.3556 |        |
| 29 | SNP 3 | p32750-rs7967521  | Intron 1 | G, 0.3425 | GG/AG/AA | 89/306/310  | -0.2137 | 0.2936 |        | 91/304/315  | 0.0564  | 0.9104 |        |

|    |       |                        |          |           |          |             |         |        |               |             |         |        |        |
|----|-------|------------------------|----------|-----------|----------|-------------|---------|--------|---------------|-------------|---------|--------|--------|
| 29 | SNP 4 | p32777-rs11057841      | Intron 1 | A, 0.2805 | GG/GA/AA | 367/307/50  | -0.1217 | 0.5781 |               | 374/303/52  | 0.0373  | 0.9450 |        |
| 30 | SNP 1 | p32395-rs12581963      | Intron 1 | T, 0.1314 | TT/CT/CC | 11/179/557  | -0.3173 | 0.2589 | 0.3979        | 11/177/570  | -0.6483 | 0.3556 | 0.9607 |
| 30 | SNP 2 | p32750-rs7967521       | Intron 1 | G, 0.3425 | GG/AG/AA | 89/306/310  | -0.2137 | 0.2936 |               | 91/304/315  | 0.0564  | 0.9104 |        |
| 30 | SNP 3 | p32777-rs11057841      | Intron 1 | A, 0.2805 | GG/GA/AA | 367/307/50  | -0.1217 | 0.5781 |               | 374/303/52  | 0.0373  | 0.9450 |        |
| 30 | SNP 4 | p32860-rs7967406       | Intron 1 | C, 0.0991 | CC/AC/AA | 9/131/608   | 0.2647  | 0.3996 |               | 9/135/616   | 0.4768  | 0.5369 |        |
| 31 | SNP 1 | p32750-rs7967521       | Intron 1 | G, 0.3425 | GG/AG/AA | 89/306/310  | -0.2137 | 0.2936 | 0.3062        | 91/304/315  | 0.0564  | 0.9104 | 0.9880 |
| 31 | SNP 2 | p32777-rs11057841      | Intron 1 | A, 0.2805 | GG/GA/AA | 367/307/50  | -0.1217 | 0.5781 |               | 374/303/52  | 0.0373  | 0.9450 |        |
| 31 | SNP 3 | p32860-rs7967406       | Intron 1 | C, 0.0991 | CC/AC/AA | 9/131/608   | 0.2647  | 0.3996 |               | 9/135/616   | 0.4768  | 0.5369 |        |
| 31 | SNP 4 | p33531-rs11057838      | Intron 1 | A, 0.2278 | CC/CA/AA | 439/254/41  | -0.2064 | 0.3609 |               | 440/259/40  | 0.1993  | 0.7218 |        |
| 32 | SNP 1 | p32777-rs11057841      | Intron 1 | A, 0.2805 | GG/GA/AA | 367/307/50  | -0.1217 | 0.5781 | 0.3039        | 374/303/52  | 0.0373  | 0.9450 | 0.9957 |
| 32 | SNP 2 | p32860-rs7967406       | Intron 1 | C, 0.0991 | CC/AC/AA | 9/131/608   | 0.2647  | 0.3996 |               | 9/135/616   | 0.4768  | 0.5369 |        |
| 32 | SNP 3 | p33531-rs11057838      | Intron 1 | A, 0.2278 | CC/CA/AA | 439/254/41  | -0.2064 | 0.3609 |               | 440/259/40  | 0.1993  | 0.7218 |        |
| 32 | SNP 4 | p36094-rs11608336      | Intron 1 | A, 0.1543 | GG/GA/AA | 521/195/15  | 0.3354  | 0.2108 |               | 526/195/16  | -0.0956 | 0.8848 |        |
| 33 | SNP 1 | p32860-rs7967406       | Intron 1 | C, 0.0991 | CC/AC/AA | 9/131/608   | 0.2647  | 0.3996 | 0.1952        | 9/135/616   | 0.4768  | 0.5369 | 0.5389 |
| 33 | SNP 2 | p33531-rs11057838      | Intron 1 | A, 0.2278 | CC/CA/AA | 439/254/41  | -0.2064 | 0.3609 |               | 440/259/40  | 0.1993  | 0.7218 |        |
| 33 | SNP 3 | p36094-rs11608336      | Intron 1 | A, 0.1543 | GG/GA/AA | 521/195/15  | 0.3354  | 0.2108 |               | 526/195/16  | -0.0956 | 0.8848 |        |
| 33 | SNP 4 | p36361-rs4765178       | Intron 1 | T, 0.1671 | TT/CT/CC | 19/201/496  | -0.1369 | 0.6024 |               | 18/205/497  | 0.5087  | 0.4368 |        |
| 34 | SNP 1 | p33531-rs11057838      | Intron 1 | A, 0.2278 | CC/CA/AA | 439/254/41  | -0.2064 | 0.3609 | 0.7481        | 440/259/40  | 0.1993  | 0.7218 | 0.3649 |
| 34 | SNP 2 | p36094-rs11608336      | Intron 1 | A, 0.1543 | GG/GA/AA | 521/195/15  | 0.3354  | 0.2108 |               | 526/195/16  | -0.0956 | 0.8848 |        |
| 34 | SNP 3 | p36361-rs4765178       | Intron 1 | T, 0.1671 | TT/CT/CC | 19/201/496  | -0.1369 | 0.6024 |               | 18/205/497  | 0.5087  | 0.4368 |        |
| 34 | SNP 4 | p36908-rs10846745      | Intron 1 | G, 0.3257 | GG/CG/CC | 76/334/329  | -0.0384 | 0.8511 |               | 78/335/337  | 0.0089  | 0.9859 |        |
| 35 | SNP 1 | p36094-rs11608336      | Intron 1 | A, 0.1543 | GG/GA/AA | 521/195/15  | 0.3354  | 0.2108 | 0.9219        | 526/195/16  | -0.0956 | 0.8848 | 0.8447 |
| 35 | SNP 2 | p36361-rs4765178       | Intron 1 | T, 0.1671 | TT/CT/CC | 19/201/496  | -0.1369 | 0.6024 |               | 18/205/497  | 0.5087  | 0.4368 |        |
| 35 | SNP 3 | p36908-rs10846745      | Intron 1 | G, 0.3257 | GG/CG/CC | 76/334/329  | -0.0384 | 0.8511 |               | 78/335/337  | 0.0089  | 0.9859 |        |
| 35 | SNP 4 | p37095-rs10846744      | Intron 1 | G, 0.3056 | CC/CG/GG | 348/340/57  | 0.1168  | 0.5829 |               | 350/350/56  | 0.1538  | 0.7732 |        |
| 36 | SNP 1 | p36361-rs4765178       | Intron 1 | T, 0.1671 | TT/CT/CC | 19/201/496  | -0.1369 | 0.6024 | 0.4949        | 18/205/497  | 0.5087  | 0.4368 | 0.9787 |
| 36 | SNP 2 | p36908-rs10846745      | Intron 1 | G, 0.3257 | GG/CG/CC | 76/334/329  | -0.0384 | 0.8511 |               | 78/335/337  | 0.0089  | 0.9859 |        |
| 36 | SNP 3 | p37095-rs10846744      | Intron 1 | G, 0.3056 | CC/CG/GG | 348/340/57  | 0.1168  | 0.5829 |               | 350/350/56  | 0.1538  | 0.7732 |        |
| 36 | SNP 4 | p41632-rs6488943       | Intron 1 | C, 0.2954 | CC/AC/AA | 50/309/337  | -0.2195 | 0.3244 |               | 52/312/340  | 0.3025  | 0.5783 |        |
| 37 | SNP 1 | p36908-rs10846745      | Intron 1 | G, 0.3257 | GG/CG/CC | 76/334/329  | -0.0384 | 0.8511 | 0.8624        | 78/335/337  | 0.0089  | 0.9859 | 0.7511 |
| 37 | SNP 2 | p37095-rs10846744      | Intron 1 | G, 0.3056 | CC/CG/GG | 348/340/57  | 0.1168  | 0.5829 |               | 350/350/56  | 0.1538  | 0.7732 |        |
| 37 | SNP 3 | p41632-rs6488943       | Intron 1 | C, 0.2954 | CC/AC/AA | 50/309/337  | -0.2195 | 0.3244 |               | 52/312/340  | 0.3025  | 0.5783 |        |
| 37 | SNP 4 | p42467-rs11057830      | Intron 1 | T, 0.1523 | TT/CT/CC | 13/201/523  | -0.2810 | 0.3015 |               | 14/200/533  | -0.9351 | 0.1612 |        |
| 38 | SNP 1 | p37095-rs10846744      | Intron 1 | G, 0.3056 | CC/CG/GG | 348/340/57  | 0.1168  | 0.5829 | 0.4622        | 350/350/56  | 0.1538  | 0.7732 | 0.8715 |
| 38 | SNP 2 | p41632-rs6488943       | Intron 1 | C, 0.2954 | CC/AC/AA | 50/309/337  | -0.2195 | 0.3244 |               | 52/312/340  | 0.3025  | 0.5783 |        |
| 38 | SNP 3 | p42467-rs11057830      | Intron 1 | T, 0.1523 | TT/CT/CC | 13/201/523  | -0.2810 | 0.3015 |               | 14/200/533  | -0.9351 | 0.1612 |        |
| 38 | SNP 4 | p45516-rs1902569       | Intron 1 | A, 0.1544 | AA/GA/GG | 18/190/519  | 0.5447  | 0.0386 |               | 18/191/523  | 0.5127  | 0.4331 |        |
| 39 | SNP 1 | p41632-rs6488943       | Intron 1 | C, 0.2954 | CC/AC/AA | 50/309/337  | -0.2195 | 0.3244 | <b>0.0207</b> | 52/312/340  | 0.3025  | 0.5783 | 0.4914 |
| 39 | SNP 2 | p42467-rs11057830      | Intron 1 | T, 0.1523 | TT/CT/CC | 13/201/523  | -0.2810 | 0.3015 |               | 14/200/533  | -0.9351 | 0.1612 |        |
| 39 | SNP 3 | p45516-rs1902569       | Intron 1 | A, 0.1544 | AA/GA/GG | 18/190/519  | 0.5447  | 0.0386 |               | 18/191/523  | 0.5127  | 0.4331 |        |
| 39 | SNP 4 | p45627-rs12297372      | Intron 1 | G, 0.0487 | GG/AG/AA | 1/68/659    | -0.0483 | 0.9156 |               | 1/71/661    | 0.9720  | 0.3816 |        |
| 40 | SNP 1 | p42467-rs11057830      | Intron 1 | T, 0.1523 | TT/CT/CC | 13/201/523  | -0.2810 | 0.3015 | 0.3346        | 14/200/533  | -0.9351 | 0.1612 | 0.5468 |
| 40 | SNP 2 | p45516-rs1902569       | Intron 1 | A, 0.1544 | AA/GA/GG | 18/190/519  | 0.5447  | 0.0386 |               | 18/191/523  | 0.5127  | 0.4331 |        |
| 40 | SNP 3 | p45627-rs12297372      | Intron 1 | G, 0.0487 | GG/AG/AA | 1/68/659    | -0.0483 | 0.9156 |               | 1/71/661    | 0.9720  | 0.3816 |        |
| 40 | SNP 4 | p46964-rs114061302     | Intron 1 | A, 0.0388 | AA/GA/GG | 1/55/688    | 0.0526  | 0.9158 |               | 1/58/696    | 0.4839  | 0.6895 |        |
| 41 | SNP 1 | p45516-rs1902569       | Intron 1 | A, 0.1544 | AA/GA/GG | 18/190/519  | 0.5447  | 0.0386 | 0.2665        | 18/191/523  | 0.5127  | 0.4331 | 0.8055 |
| 41 | SNP 2 | p45627-rs12297372      | Intron 1 | G, 0.0487 | GG/AG/AA | 1/68/659    | -0.0483 | 0.9156 |               | 1/71/661    | 0.9720  | 0.3816 |        |
| 41 | SNP 3 | p46964-rs114061302     | Intron 1 | A, 0.0388 | AA/GA/GG | 1/55/688    | 0.0526  | 0.9158 |               | 1/58/696    | 0.4839  | 0.6895 |        |
| 41 | SNP 4 | p48969-rs2343394       | Intron 2 | T, 0.1898 | TT/CT/CC | 32/225/491  | 0.3165  | 0.1788 |               | 32/226/501  | 0.6411  | 0.2714 |        |
| 42 | SNP 1 | p45627-rs12297372      | Intron 1 | G, 0.0487 | GG/AG/AA | 1/68/659    | -0.0483 | 0.9156 | 0.6060        | 1/71/661    | 0.9720  | 0.3816 | 0.8644 |
| 42 | SNP 2 | p46964-rs114061302     | Intron 1 | A, 0.0388 | AA/GA/GG | 1/55/688    | 0.0526  | 0.9158 |               | 1/58/696    | 0.4839  | 0.6895 |        |
| 42 | SNP 3 | p48969-rs2343394       | Intron 2 | T, 0.1898 | TT/CT/CC | 32/225/491  | 0.3165  | 0.1788 |               | 32/226/501  | 0.6411  | 0.2714 |        |
| 42 | SNP 4 | p49537-rs7305310       | Intron 2 | T, 0.1007 | CC/CT/TT | 595/117/16  | -0.3396 | 0.2566 |               | 601/118/16  | -0.2265 | 0.7599 |        |
| 43 | SNP 1 | p46964-rs114061302     | Intron 1 | A, 0.0388 | AA/GA/GG | 1/55/688    | 0.0526  | 0.9158 | 0.2986        | 1/58/696    | 0.4839  | 0.6895 | 0.6379 |
| 43 | SNP 2 | p48969-rs2343394       | Intron 2 | T, 0.1898 | TT/CT/CC | 32/225/491  | 0.3165  | 0.1788 |               | 32/226/501  | 0.6411  | 0.2714 |        |
| 43 | SNP 3 | p49537-rs7305310       | Intron 2 | T, 0.1007 | CC/CT/TT | 595/117/16  | -0.3396 | 0.2566 |               | 601/118/16  | -0.2265 | 0.7599 |        |
| 43 | SNP 4 | p49570delC-rs145376237 | Intron 2 | 0.2276    | DD/WD/WW | 36/260/432  | 0.3121  | 0.1773 |               | 37/260/437  | 0.4929  | 0.3880 |        |
| 44 | SNP 1 | p48969-rs2343394       | Intron 2 | T, 0.1898 | TT/CT/CC | 32/225/491  | 0.3165  | 0.1788 | <b>0.0271</b> | 32/226/501  | 0.6411  | 0.2714 | 0.3331 |
| 44 | SNP 2 | p49537-rs7305310       | Intron 2 | T, 0.1007 | CC/CT/TT | 595/117/16  | -0.3396 | 0.2566 |               | 601/118/16  | -0.2265 | 0.7599 |        |
| 44 | SNP 3 | p49570delC-rs145376237 | Intron 2 | 0.2276    | DD/WD/WW | 36/260/432  | 0.3121  | 0.1773 |               | 37/260/437  | 0.4929  | 0.3880 |        |
| 44 | SNP 4 | p49690-rs4765615       | Intron 2 | A, 0.4426 | AA/GA/GG | 156/318/244 | -0.4646 | 0.0130 |               | 157/323/244 | -0.9139 | 0.0480 |        |

|    |       |                        |          |                    |          |             |         |        |               |             |          |        |               |
|----|-------|------------------------|----------|--------------------|----------|-------------|---------|--------|---------------|-------------|----------|--------|---------------|
| 45 | SNP 1 | p49537-rs7305310       | Intron 2 | T, 0.1007<br>delC, | CC/CT/TT | 595/117/16  | -0.3396 | 0.2566 | <b>0.0155</b> | 601/118/16  | -0.2265  | 0.7599 | 0.2586        |
| 45 | SNP 2 | p49570delC-rs145376237 | Intron 2 | 0.2276             | DD/WD/WW | 36/260/432  | 0.3121  | 0.1773 |               | 37/260/437  | 0.4929   | 0.3880 |               |
| 45 | SNP 3 | p49690-rs4765615       | Intron 2 | A, 0.4426          | AA/GA/GG | 156/318/244 | -0.4646 | 0.0130 |               | 157/323/244 | -0.9139  | 0.0480 |               |
| 45 | SNP 4 | p49759-rs146272788     | Intron 2 | T, 0.002<br>delC,  | CC/CT    | 725/3       | 2.5988  | 0.2219 |               | 731/3       | 1.5883   | 0.7630 |               |
| 46 | SNP 1 | p49570delC-rs145376237 | Intron 2 | 0.2276             | DD/WD/WW | 36/260/432  | 0.3121  | 0.1773 | <b>0.0278</b> | 37/260/437  | 0.4929   | 0.3880 | 0.0675        |
| 46 | SNP 2 | p49690-rs4765615       | Intron 2 | A, 0.4426          | AA/GA/GG | 156/318/244 | -0.4646 | 0.0130 |               | 157/323/244 | -0.9139  | 0.0480 |               |
| 46 | SNP 3 | p49759-rs146272788     | Intron 2 | T, 0.002           | CC/CT    | 725/3       | 2.5988  | 0.2219 |               | 731/3       | 1.5883   | 0.7630 |               |
| 46 | SNP 4 | p49978-rs5891          | Exon 3   | A, 0.0058          | GA/GG    | 9/743       | 1.3374  | 0.2791 |               | 9/754       | 5.6762   | 0.0628 |               |
| 47 | SNP 1 | p49690-rs4765615       | Intron 2 | A, 0.4426          | AA/GA/GG | 156/318/244 | -0.4646 | 0.0130 | <b>0.0079</b> | 157/323/244 | -0.9139  | 0.0480 | <b>0.0343</b> |
| 47 | SNP 2 | p49759-rs146272788     | Intron 2 | T, 0.002           | CC/CT    | 725/3       | 2.5988  | 0.2219 |               | 731/3       | 1.5883   | 0.7630 |               |
| 47 | SNP 3 | p49978-rs5891          | Exon 3   | A, 0.0058          | GA/GG    | 9/743       | 1.3374  | 0.2791 |               | 9/754       | 5.6762   | 0.0628 |               |
| 47 | SNP 4 | p50024-rs368880622     | Intron 3 | T, 0.0026          | GG/GT    | 737/3       | 1.6506  | 0.4362 |               | 742/4       | 1.6012   | 0.7255 |               |
| 48 | SNP 1 | p49759-rs146272788     | Intron 2 | T, 0.002           | CC/CT    | 725/3       | 2.5988  | 0.2219 | 0.1075        | 731/3       | 1.5883   | 0.7630 | <b>0.0293</b> |
| 48 | SNP 2 | p49978-rs5891          | Exon 3   | A, 0.0058          | GA/GG    | 9/743       | 1.3374  | 0.2791 |               | 9/754       | 5.6762   | 0.0628 |               |
| 48 | SNP 3 | p50024-rs368880622     | Intron 3 | T, 0.0026          | GG/GT    | 737/3       | 1.6506  | 0.4362 |               | 742/4       | 1.6012   | 0.7255 |               |
| 48 | SNP 4 | p50118-rs58710319      | Intron 3 | T, 0.0208          | CT/CC    | 31/711      | 0.7885  | 0.2399 |               | 32/719      | 3.1376   | 0.0571 |               |
| 49 | SNP 1 | p49978-rs5891          | Exon 3   | A, 0.0058          | GA/GG    | 9/743       | 1.3374  | 0.2791 | 0.0672        | 9/754       | 5.6762   | 0.0628 | <b>0.0289</b> |
| 49 | SNP 2 | p50024-rs368880622     | Intron 3 | T, 0.0026          | GG/GT    | 737/3       | 1.6506  | 0.4362 |               | 742/4       | 1.6012   | 0.7255 |               |
| 49 | SNP 3 | p50118-rs58710319      | Intron 3 | T, 0.0208          | CT/CC    | 31/711      | 0.7885  | 0.2399 |               | 32/719      | 3.1376   | 0.0571 |               |
| 49 | SNP 4 | p50151-rs2278986       | Intron 3 | C, 0.1933          | CC/TC/TT | 33/225/484  | 0.4333  | 0.0656 |               | 33/226/494  | 0.8568   | 0.1419 |               |
| 50 | SNP 1 | p50024-rs368880622     | Intron 3 | T, 0.0026          | GG/GT    | 737/3       | 1.6506  | 0.4362 | 0.1980        | 742/4       | 1.6012   | 0.7255 | 0.1897        |
| 50 | SNP 2 | p50118-rs58710319      | Intron 3 | T, 0.0208          | CT/CC    | 31/711      | 0.7885  | 0.2399 |               | 32/719      | 3.1376   | 0.0571 |               |
| 50 | SNP 3 | p50151-rs2278986       | Intron 3 | C, 0.1933          | CC/TC/TT | 33/225/484  | 0.4333  | 0.0656 |               | 33/226/494  | 0.8568   | 0.1419 |               |
| 50 | SNP 4 | p50380-rs141748317     | Intron 3 | G, 0.0112          | AA/AG    | 723/15      | -0.0273 | 0.9772 |               | 727/17      | 0.3920   | 0.8609 |               |
| 51 | SNP 1 | p50118-rs58710319      | Intron 3 | T, 0.0208          | CT/CC    | 31/711      | 0.7885  | 0.2399 | 0.1254        | 32/719      | 3.1376   | 0.0571 | 0.0779        |
| 51 | SNP 2 | p50151-rs2278986       | Intron 3 | C, 0.1933          | CC/TC/TT | 33/225/484  | 0.4333  | 0.0656 |               | 33/226/494  | 0.8568   | 0.1419 |               |
| 51 | SNP 3 | p50380-rs141748317     | Intron 3 | G, 0.0112          | AA/AG    | 723/15      | -0.0273 | 0.9772 |               | 727/17      | 0.3920   | 0.8609 |               |
| 51 | SNP 4 | p50489-rs61320152      | Intron 3 | T, 0.0257          | GG/GT    | 699/38      | 0.2390  | 0.6958 |               | 704/39      | 2.1813   | 0.1439 |               |
| 52 | SNP 1 | p50151-rs2278986       | Intron 3 | C, 0.1933          | CC/TC/TT | 33/225/484  | 0.4333  | 0.0656 | 0.2903        | 33/226/494  | 0.8568   | 0.1419 | 0.1905        |
| 52 | SNP 2 | p50380-rs141748317     | Intron 3 | G, 0.0112          | AA/AG    | 723/15      | -0.0273 | 0.9772 |               | 727/17      | 0.3920   | 0.8609 |               |
| 52 | SNP 3 | p50489-rs61320152      | Intron 3 | T, 0.0257          | GG/GT    | 699/38      | 0.2390  | 0.6958 |               | 704/39      | 2.1813   | 0.1439 |               |
| 52 | SNP 4 | p50954-chr12_125298566 | Intron 4 | C, 0.0007          | TC/TT    | 1/735       | 4.5639  | 0.2131 |               | 1/742       | -8.7626  | 0.3375 |               |
| 53 | SNP 1 | p50380-rs141748317     | Intron 3 | G, 0.0112          | AA/AG    | 723/15      | -0.0273 | 0.9772 | 0.9605        | 727/17      | 0.3920   | 0.8609 | 0.5439        |
| 53 | SNP 2 | p50489-rs61320152      | Intron 3 | T, 0.0257          | GG/GT    | 699/38      | 0.2390  | 0.6958 |               | 704/39      | 2.1813   | 0.1439 |               |
| 53 | SNP 3 | p50954-chr12_125298566 | Intron 4 | C, 0.0007          | TC/TT    | 1/735       | 4.5639  | 0.2131 |               | 1/742       | -8.7626  | 0.3375 |               |
| 53 | SNP 4 | p51888-rs7138304       | Intron 4 | T, 0.1079          | TT/CT/CC | 16/129/589  | -0.0610 | 0.8334 |               | 16/130/593  | -0.0031  | 0.9965 |               |
| 54 | SNP 1 | p50489-rs61320152      | Intron 3 | T, 0.0257          | GG/GT    | 699/38      | 0.2390  | 0.6958 | 0.8543        | 704/39      | 2.1813   | 0.1439 | 0.6688        |
| 54 | SNP 2 | p50954-chr12_125298566 | Intron 4 | C, 0.0007          | TC/TT    | 1/735       | 4.5639  | 0.2131 |               | 1/742       | -8.7626  | 0.3375 |               |
| 54 | SNP 3 | p51888-rs7138304       | Intron 4 | T, 0.1079          | TT/CT/CC | 16/129/589  | -0.0610 | 0.8334 |               | 16/130/593  | -0.0031  | 0.9965 |               |
| 54 | SNP 4 | p52096-rs10846739      | Intron 4 | G, 0.4693          | GG/AG/AA | 169/343/217 | 0.0195  | 0.9168 |               | 172/342/221 | -0.1537  | 0.7377 |               |
| 55 | SNP 1 | p50954-chr12_125298566 | Intron 4 | C, 0.0007          | TC/TT    | 1/735       | 4.5639  | 0.2131 | 0.6351        | 1/742       | -8.7626  | 0.3375 | 0.5383        |
| 55 | SNP 2 | p51888-rs7138304       | Intron 4 | T, 0.1079          | TT/CT/CC | 16/129/589  | -0.0610 | 0.8334 |               | 16/130/593  | -0.0031  | 0.9965 |               |
| 55 | SNP 3 | p52096-rs10846739      | Intron 4 | G, 0.4693          | GG/AG/AA | 169/343/217 | 0.0195  | 0.9168 |               | 172/342/221 | -0.1537  | 0.7377 |               |
| 55 | SNP 4 | p52556-rs11057820      | Intron 4 | A, 0.1             | AA/GA/GG | 12/124/610  | -0.1513 | 0.6235 |               | 12/126/619  | -1.1588  | 0.1282 |               |
| 56 | SNP 1 | p51888-rs7138304       | Intron 4 | T, 0.1079          | TT/CT/CC | 16/129/589  | -0.0610 | 0.8334 | 0.9587        | 16/130/593  | -0.0031  | 0.9965 | 0.3509        |
| 56 | SNP 2 | p52096-rs10846739      | Intron 4 | G, 0.4693          | GG/AG/AA | 169/343/217 | 0.0195  | 0.9168 |               | 172/342/221 | -0.1537  | 0.7377 |               |
| 56 | SNP 3 | p52556-rs11057820      | Intron 4 | A, 0.1             | AA/GA/GG | 12/124/610  | -0.1513 | 0.6235 |               | 12/126/619  | -1.1588  | 0.1282 |               |
| 56 | SNP 4 | p52610-rs10846738      | Intron 4 | T, 0.1349          | TT/CT/CC | 12/172/545  | -0.0102 | 0.9710 |               | 13/172/553  | -0.6490  | 0.3462 |               |
| 57 | SNP 1 | p52096-rs10846739      | Intron 4 | G, 0.4693          | GG/AG/AA | 169/343/217 | 0.0195  | 0.9168 | 0.5802        | 172/342/221 | -0.1537  | 0.7377 | 0.3474        |
| 57 | SNP 2 | p52556-rs11057820      | Intron 4 | A, 0.1             | AA/GA/GG | 12/124/610  | -0.1513 | 0.6235 |               | 12/126/619  | -1.1588  | 0.1282 |               |
| 57 | SNP 3 | p52610-rs10846738      | Intron 4 | T, 0.1349          | TT/CT/CC | 12/172/545  | -0.0102 | 0.9710 |               | 13/172/553  | -0.6490  | 0.3462 |               |
| 57 | SNP 4 | p52919-chr12_125296601 | Intron 4 | T, 0.0013          | GG/GT    | 734/2       | -7.4063 | 0.0043 |               | 741/2       | -13.4137 | 0.0385 |               |
| 58 | SNP 1 | p52556-rs11057820      | Intron 4 | A, 0.1             | AA/GA/GG | 12/124/610  | -0.1513 | 0.6235 | 0.2618        | 12/126/619  | -1.1588  | 0.1282 | 0.1625        |
| 58 | SNP 2 | p52610-rs10846738      | Intron 4 | T, 0.1349          | TT/CT/CC | 12/172/545  | -0.0102 | 0.9710 |               | 13/172/553  | -0.6490  | 0.3462 |               |
| 58 | SNP 3 | p52919-chr12_125296601 | Intron 4 | T, 0.0013          | GG/GT    | 734/2       | -7.4063 | 0.0043 |               | 741/2       | -13.4137 | 0.0385 |               |
| 58 | SNP 4 | p52956-rs77740046      | Intron 4 | T, 0.0546          | CC/CT/TT | 651/75/3    | 0.3300  | 0.4288 |               | 657/75/3    | -0.4428  | 0.6689 |               |
| 59 | SNP 1 | p52610-rs10846738      | Intron 4 | T, 0.1349          | TT/CT/CC | 12/172/545  | -0.0102 | 0.9710 | 0.1054        | 13/172/553  | -0.6490  | 0.3462 | 0.4723        |

|    |       |                            |                          |           |          |             |         |        |               |             |          |        |               |
|----|-------|----------------------------|--------------------------|-----------|----------|-------------|---------|--------|---------------|-------------|----------|--------|---------------|
| 59 | SNP 2 | p52919-<br>chr12_125296601 | Intron 4                 | T, 0.0013 | GG/GT    | 734/2       | -7.4063 | 0.0043 |               | 741/2       | -13.4137 | 0.0385 |               |
| 59 | SNP 3 | p52956-rs77740046          | Intron 4                 | T, 0.0546 | CC/CT/TT | 651/75/3    | 0.3300  | 0.4288 |               | 657/75/3    | -0.4428  | 0.6689 |               |
| 59 | SNP 4 | p52995-rs113910315         | Intron 4-<br>splice site | G, 0.002  | TG/TT    | 3/740       | -1.4175 | 0.5038 |               | 3/746       | 0.6563   | 0.9010 |               |
| 60 | SNP 1 | p52919-<br>chr12_125296601 | Intron 4                 | T, 0.0013 | GG/GT    | 734/2       | -7.4063 | 0.0043 | 0.1743        | 741/2       | -13.4137 | 0.0385 | 0.5102        |
| 60 | SNP 2 | p52956-rs77740046          | Intron 4                 | T, 0.0546 | CC/CT/TT | 651/75/3    | 0.3300  | 0.4288 |               | 657/75/3    | -0.4428  | 0.6689 |               |
| 60 | SNP 3 | p52995-rs113910315         | Intron 4-<br>splice site | G, 0.002  | TG/TT    | 3/740       | -1.4175 | 0.5038 |               | 3/746       | 0.6563   | 0.9010 |               |
| 60 | SNP 4 | p53359-rs112371713         | Intron 5                 | A, 0.1243 | AA/GA/GG | 9/160/549   | 0.4193  | 0.1651 |               | 10/161/554  | 0.8266   | 0.2605 |               |
| 61 | SNP 1 | p52956-rs77740046          | Intron 4                 | T, 0.0546 | CC/CT/TT | 651/75/3    | 0.3300  | 0.4288 | 0.1406        | 657/75/3    | -0.4428  | 0.6689 | 0.2847        |
| 61 | SNP 2 | p52995-rs113910315         | Intron 4-<br>splice site | G, 0.002  | TG/TT    | 3/740       | -1.4175 | 0.5038 |               | 3/746       | 0.6563   | 0.9010 |               |
| 61 | SNP 3 | p53359-rs112371713         | Intron 5                 | A, 0.1243 | AA/GA/GG | 9/160/549   | 0.4193  | 0.1651 |               | 10/161/554  | 0.8266   | 0.2605 |               |
| 61 | SNP 4 | p53372-<br>rs115604379     | Intron 5                 | T, 0.0066 | CC/CT    | 729/10      | 3.0372  | 0.0093 |               | 735/10      | 4.3130   | 0.1386 |               |
| 62 | SNP 1 | p52995-rs113910315         | Intron 4-<br>splice site | G, 0.002  | TG/TT    | 3/740       | -1.4175 | 0.5038 | 0.0712        | 3/746       | 0.6563   | 0.9010 | 0.3287        |
| 62 | SNP 2 | p53359-rs112371713         | Intron 5                 | A, 0.1243 | AA/GA/GG | 9/160/549   | 0.4193  | 0.1651 |               | 10/161/554  | 0.8266   | 0.2605 |               |
| 62 | SNP 3 | p53372-<br>rs115604379     | Intron 5                 | T, 0.0066 | CC/CT    | 729/10      | 3.0372  | 0.0093 |               | 735/10      | 4.3130   | 0.1386 |               |
| 62 | SNP 4 | p53790-rs4765614           | Intron 5                 | A, 0.2653 | GG/GA/AA | 399/276/58  | -0.3281 | 0.1218 |               | 402/277/59  | -0.4621  | 0.3775 |               |
| 63 | SNP 1 | p53359-rs112371713         | Intron 5                 | A, 0.1243 | AA/GA/GG | 9/160/549   | 0.4193  | 0.1651 | <b>0.0394</b> | 10/161/554  | 0.8266   | 0.2605 | 0.3391        |
| 63 | SNP 2 | p53372-<br>rs115604379     | Intron 5                 | T, 0.0066 | CC/CT    | 729/10      | 3.0372  | 0.0093 |               | 735/10      | 4.3130   | 0.1386 |               |
| 63 | SNP 3 | p53790-rs4765614           | Intron 5                 | A, 0.2653 | GG/GA/AA | 399/276/58  | -0.3281 | 0.1218 |               | 402/277/59  | -0.4621  | 0.3775 |               |
| 63 | SNP 4 | p54445-rs60910935          | Intron 5                 | G, 0.0418 | AA/AG/GG | 650/56/2    | -0.1247 | 0.7963 |               | 656/57/2    | -0.9880  | 0.4074 |               |
| 64 | SNP 1 | p53372-<br>rs115604379     | Intron 5                 | T, 0.0066 | CC/CT    | 729/10      | 3.0372  | 0.0093 | 0.0691        | 735/10      | 4.3130   | 0.1386 | 0.5878        |
| 64 | SNP 2 | p53790-rs4765614           | Intron 5                 | A, 0.2653 | GG/GA/AA | 399/276/58  | -0.3281 | 0.1218 |               | 402/277/59  | -0.4621  | 0.3775 |               |
| 64 | SNP 3 | p54445-rs60910935          | Intron 5                 | G, 0.0418 | AA/AG/GG | 650/56/2    | -0.1247 | 0.7963 |               | 656/57/2    | -0.9880  | 0.4074 |               |
| 64 | SNP 4 | p54475-rs60227139          | Intron 5                 | T, 0.0437 | CC/CT/TT | 670/61/2    | -0.0602 | 0.8966 |               | 676/61/2    | -0.7550  | 0.5114 |               |
| 65 | SNP 1 | p53790-rs4765614           | Intron 5                 | A, 0.2653 | GG/GA/AA | 399/276/58  | -0.3281 | 0.1218 | 0.4454        | 402/277/59  | -0.4621  | 0.3775 | 0.6493        |
| 65 | SNP 2 | p54445-rs60910935          | Intron 5                 | G, 0.0418 | AA/AG/GG | 650/56/2    | -0.1247 | 0.7963 |               | 656/57/2    | -0.9880  | 0.4074 |               |
| 65 | SNP 3 | p54475-rs60227139          | Intron 5                 | T, 0.0437 | CC/CT/TT | 670/61/2    | -0.0602 | 0.8966 |               | 676/61/2    | -0.7550  | 0.5114 |               |
| 65 | SNP 4 | p54492-rs61762481          | Intron 5                 | A, 0.1005 | AA/GA/GG | 8/137/607   | -0.1522 | 0.6257 |               | 8/137/618   | -0.1546  | 0.8416 |               |
| 66 | SNP 1 | p54445-rs60910935          | Intron 5                 | G, 0.0418 | AA/AG/GG | 650/56/2    | -0.1247 | 0.7963 | 0.4715        | 656/57/2    | -0.9880  | 0.4074 | 0.3202        |
| 66 | SNP 2 | p54475-rs60227139          | Intron 5                 | T, 0.0437 | CC/CT/TT | 670/61/2    | -0.0602 | 0.8966 |               | 676/61/2    | -0.7550  | 0.5114 |               |
| 66 | SNP 3 | p54492-rs61762481          | Intron 5                 | A, 0.1005 | AA/GA/GG | 8/137/607   | -0.1522 | 0.6257 |               | 8/137/618   | -0.1546  | 0.8416 |               |
| 66 | SNP 4 | p54611-<br>chr12_125294909 | Intron 5                 | C, 0.0007 | TC/TT    | 1/742       | -9.5243 | 0.0097 |               | 1/748       | -19.2831 | 0.0344 |               |
| 67 | SNP 1 | p54475-rs60227139          | Intron 5                 | T, 0.0437 | CC/CT/TT | 670/61/2    | -0.0602 | 0.8966 | 0.8784        | 676/61/2    | -0.7550  | 0.5114 | 0.8769        |
| 67 | SNP 2 | p54492-rs61762481          | Intron 5                 | A, 0.1005 | AA/GA/GG | 8/137/607   | -0.1522 | 0.6257 |               | 8/137/618   | -0.1546  | 0.8416 |               |
| 67 | SNP 3 | p54611-<br>chr12_125294909 | Intron 5                 | C, 0.0007 | TC/TT    | 1/742       | -9.5243 | 0.0097 |               | 1/748       | -19.2831 | 0.0344 |               |
| 67 | SNP 4 | p54627-<br>chr12_125294893 | Intron 5                 | C, 0.002  | GC/GG    | 3/733       | 0.9473  | 0.6571 |               | 3/744       | 3.6910   | 0.4850 |               |
| 68 | SNP 1 | p54492-rs61762481          | Intron 5                 | A, 0.1005 | AA/GA/GG | 8/137/607   | -0.1522 | 0.6257 | 0.1570        | 8/137/618   | -0.1546  | 0.8416 | 0.2715        |
| 68 | SNP 2 | p54611-<br>chr12_125294909 | Intron 5                 | C, 0.0007 | TC/TT    | 1/742       | -9.5243 | 0.0097 |               | 1/748       | -19.2831 | 0.0344 |               |
| 68 | SNP 3 | p54627-<br>chr12_125294893 | Intron 5                 | C, 0.002  | GC/GG    | 3/733       | 0.9473  | 0.6571 |               | 3/744       | 3.6910   | 0.4850 |               |
| 68 | SNP 4 | p54856-<br>chr12_125294664 | Intron 6                 | T, 0.0007 | CC/CT    | 742/1       | -8.4305 | 0.0215 |               | 748/1       | -24.0757 | 0.0082 |               |
| 69 | SNP 1 | p54611-<br>chr12_125294909 | Intron 5                 | C, 0.0007 | TC/TT    | 1/742       | -9.5243 | 0.0097 | 0.0610        | 1/748       | -19.2831 | 0.0344 | 0.2063        |
| 69 | SNP 2 | p54627-<br>chr12_125294893 | Intron 5                 | C, 0.002  | GC/GG    | 3/733       | 0.9473  | 0.6571 |               | 3/744       | 3.6910   | 0.4850 |               |
| 69 | SNP 3 | p54856-<br>chr12_125294664 | Intron 6                 | T, 0.0007 | CC/CT    | 742/1       | -8.4305 | 0.0215 |               | 748/1       | -24.0757 | 0.0082 |               |
| 69 | SNP 4 | p55923-rs838900            | Intron 6                 | A, 0.3921 | AA/GA/GG | 113/345/275 | 0.2787  | 0.1549 |               | 115/346/282 | 0.3606   | 0.4549 |               |
| 70 | SNP 1 | p54627-<br>chr12_125294893 | Intron 5                 | C, 0.002  | GC/GG    | 3/733       | 0.9473  | 0.6571 | 0.0599        | 3/744       | 3.6910   | 0.4850 | <b>0.0140</b> |
| 70 | SNP 2 | p54856-<br>chr12_125294664 | Intron 6                 | T, 0.0007 | CC/CT    | 742/1       | -8.4305 | 0.0215 |               | 748/1       | -24.0757 | 0.0082 |               |
| 70 | SNP 3 | p55923-rs838900            | Intron 6                 | A, 0.3921 | AA/GA/GG | 113/345/275 | 0.2787  | 0.1549 |               | 115/346/282 | 0.3606   | 0.4549 |               |
| 70 | SNP 4 | p55963-rs7134858           | Intron 6                 | T, 0.156  | TT/CT/CC | 24/184/532  | 0.4418  | 0.0799 |               | 24/190/537  | 1.7537   | 0.0052 |               |
| 71 | SNP 1 | p54856-<br>chr12_125294664 | Intron 6                 | T, 0.0007 | CC/CT    | 742/1       | -8.4305 | 0.0215 | 0.0995        | 748/1       | -24.0757 | 0.0082 | <b>0.0488</b> |
| 71 | SNP 2 | p55923-rs838900            | Intron 6                 | A, 0.3921 | AA/GA/GG | 113/345/275 | 0.2787  | 0.1549 |               | 115/346/282 | 0.3606   | 0.4549 |               |
| 71 | SNP 3 | p55963-rs7134858           | Intron 6                 | T, 0.156  | TT/CT/CC | 24/184/532  | 0.4418  | 0.0799 |               | 24/190/537  | 1.7537   | 0.0052 |               |
| 71 | SNP 4 | p56845-rs838900            | Intron 6                 | G, 0.4249 | AA/AG/GG | 249/347/141 | -0.0786 | 0.6801 |               | 256/350/143 | -0.3052  | 0.5129 |               |
| 72 | SNP 1 | p55923-rs838900            | Intron 6                 | A, 0.3921 | AA/GA/GG | 113/345/275 | 0.2787  | 0.1549 | <b>0.0315</b> | 115/346/282 | 0.3606   | 0.4549 | <b>0.0463</b> |
| 72 | SNP 2 | p55963-rs7134858           | Intron 6                 | T, 0.156  | TT/CT/CC | 24/184/532  | 0.4418  | 0.0799 |               | 24/190/537  | 1.7537   | 0.0052 |               |
| 72 | SNP 3 | p56845-rs838900            | Intron 6                 | G, 0.4249 | AA/AG/GG | 249/347/141 | -0.0786 | 0.6801 |               | 256/350/143 | -0.3052  | 0.5129 |               |
| 72 | SNP 4 | p57004-<br>rs187562853     | Intron 6                 | A, 0.0098 | GG/GA    | 721/15      | 1.6474  | 0.0872 |               | 731/15      | 3.2853   | 0.1690 |               |

|    |       |                            |          |           |          |             |         |        |        |             |         |        |        |
|----|-------|----------------------------|----------|-----------|----------|-------------|---------|--------|--------|-------------|---------|--------|--------|
| 73 | SNP 1 | p55963-rs7134858           | Intron 6 | T, 0.156  | TT/CT/CC | 24/184/532  | 0.4418  | 0.0799 | 0.2741 | 24/190/537  | 1.7537  | 0.0052 | 0.0553 |
| 73 | SNP 2 | p56845-rs838902<br>p57004- | Intron 6 | G, 0.4249 | AA/AG/GG | 249/347/141 | -0.0786 | 0.6801 |        | 256/350/143 | -0.3052 | 0.5129 |        |
| 73 | SNP 3 | rs187562853                | Intron 6 | A, 0.0098 | GG/GA    | 721/15      | 1.6474  | 0.0872 |        | 731/15      | 3.2853  | 0.1690 |        |
| 73 | SNP 4 | p57107-rs5892              | Exon 7   | T, 0.0589 | CC/CT/TT | 656/85/1    | 0.0079  | 0.9848 |        | 663/84/1    | -0.4697 | 0.6488 |        |
| 74 | SNP 1 | p56845-rs838902<br>p57004- | Intron 6 | G, 0.4249 | AA/AG/GG | 249/347/141 | -0.0786 | 0.6801 | 0.4787 | 256/350/143 | -0.3052 | 0.5129 | 0.5963 |
| 74 | SNP 2 | rs187562853                | Intron 6 | A, 0.0098 | GG/GA    | 721/15      | 1.6474  | 0.0872 |        | 731/15      | 3.2853  | 0.1690 |        |
| 74 | SNP 3 | p57107-rs5892              | Exon 7   | T, 0.0589 | CC/CT/TT | 656/85/1    | 0.0079  | 0.9848 |        | 663/84/1    | -0.4697 | 0.6488 |        |
| 74 | SNP 4 | p57508-rs71458866          | Intron 7 | A, 0.113  | AA/GA/GG | 13/144/594  | -0.1926 | 0.5089 |        | 12/147/602  | -0.6325 | 0.3861 |        |
| 75 | SNP 1 | p57004-<br>rs187562853     | Intron 6 | A, 0.0098 | GG/GA    | 721/15      | 1.6474  | 0.0872 | 0.5892 | 731/15      | 3.2853  | 0.1690 | 0.2923 |
| 75 | SNP 2 | p57107-rs5892              | Exon 7   | T, 0.0589 | CC/CT/TT | 656/85/1    | 0.0079  | 0.9848 |        | 663/84/1    | -0.4697 | 0.6488 |        |
| 75 | SNP 3 | p57508-rs71458866          | Intron 7 | A, 0.113  | AA/GA/GG | 13/144/594  | -0.1926 | 0.5089 |        | 12/147/602  | -0.6325 | 0.3861 |        |
| 75 | SNP 4 | p57592-rs838903            | Intron 7 | A, 0.3763 | AA/GA/GG | 111/334/290 | -0.1598 | 0.4149 |        | 113/336/297 | -0.7661 | 0.1109 |        |
| 76 | SNP 1 | p57107-rs5892              | Exon 7   | T, 0.0589 | CC/CT/TT | 656/85/1    | 0.0079  | 0.9848 | 0.9374 | 663/84/1    | -0.4697 | 0.6488 | 0.5355 |
| 76 | SNP 2 | p57508-rs71458866          | Intron 7 | A, 0.113  | AA/GA/GG | 13/144/594  | -0.1926 | 0.5089 |        | 12/147/602  | -0.6325 | 0.3861 |        |
| 76 | SNP 3 | p57592-rs838903            | Intron 7 | A, 0.3763 | AA/GA/GG | 111/334/290 | -0.1598 | 0.4149 |        | 113/336/297 | -0.7661 | 0.1109 |        |
| 76 | SNP 4 | p58514-rs838905            | Intron 7 | C, 0.4329 | CC/TC/TT | 146/350/243 | -0.0855 | 0.6536 |        | 149/352/250 | -0.4213 | 0.3646 |        |
| 77 | SNP 1 | p57508-rs71458866          | Intron 7 | A, 0.113  | AA/GA/GG | 13/144/594  | -0.1926 | 0.5089 | 0.8016 | 12/147/602  | -0.6325 | 0.3861 | 0.5014 |
| 77 | SNP 2 | p57592-rs838903            | Intron 7 | A, 0.3763 | AA/GA/GG | 111/334/290 | -0.1598 | 0.4149 |        | 113/336/297 | -0.7661 | 0.1109 |        |
| 77 | SNP 3 | p58514-rs838905            | Intron 7 | C, 0.4329 | CC/TC/TT | 146/350/243 | -0.0855 | 0.6536 |        | 149/352/250 | -0.4213 | 0.3646 |        |
| 77 | SNP 4 | p58664-rs865716            | Intron 7 | T, 0.2708 | AA/AT/TT | 395/268/62  | -0.0965 | 0.6449 |        | 395/272/63  | 0.5369  | 0.3008 |        |
| 78 | SNP 1 | p57592-rs838903            | Intron 7 | A, 0.3763 | AA/GA/GG | 111/334/290 | -0.1598 | 0.4149 | 0.1155 | 113/336/297 | -0.7661 | 0.1109 | 0.0326 |
| 78 | SNP 2 | p58514-rs838905            | Intron 7 | C, 0.4329 | CC/TC/TT | 146/350/243 | -0.0855 | 0.6536 |        | 149/352/250 | -0.4213 | 0.3646 |        |
| 78 | SNP 3 | p58664-rs865716            | Intron 7 | T, 0.2708 | AA/AT/TT | 395/268/62  | -0.0965 | 0.6449 |        | 395/272/63  | 0.5369  | 0.3008 |        |
| 78 | SNP 4 | p60255-rs3782287           | Intron 7 | T, 0.2831 | CC/CT/TT | 378/312/51  | 0.2555  | 0.2453 |        | 384/314/55  | 0.3715  | 0.4856 |        |
| 79 | SNP 1 | p58514-rs838905            | Intron 7 | C, 0.4329 | CC/TC/TT | 146/350/243 | -0.0855 | 0.6536 | 0.0820 | 149/352/250 | -0.4213 | 0.3646 | 0.0256 |
| 79 | SNP 2 | p58664-rs865716            | Intron 7 | T, 0.2708 | AA/AT/TT | 395/268/62  | -0.0965 | 0.6449 |        | 395/272/63  | 0.5369  | 0.3008 |        |
| 79 | SNP 3 | p60255-rs3782287           | Intron 7 | T, 0.2831 | CC/CT/TT | 378/312/51  | 0.2555  | 0.2453 |        | 384/314/55  | 0.3715  | 0.4856 |        |
| 79 | SNP 4 | p61872-rs838909            | Intron 7 | T, 0.2199 | CC/CT/TT | 449/249/36  | 0.1223  | 0.5945 |        | 453/251/36  | 0.9232  | 0.1056 |        |
| 80 | SNP 1 | p58664-rs865716            | Intron 7 | T, 0.2708 | AA/AT/TT | 395/268/62  | -0.0965 | 0.6449 | 0.1146 | 395/272/63  | 0.5369  | 0.3008 | 0.0030 |
| 80 | SNP 2 | p60255-rs3782287           | Intron 7 | T, 0.2831 | CC/CT/TT | 378/312/51  | 0.2555  | 0.2453 |        | 384/314/55  | 0.3715  | 0.4856 |        |
| 80 | SNP 3 | p61872-rs838909            | Intron 7 | T, 0.2199 | CC/CT/TT | 449/249/36  | 0.1223  | 0.5945 |        | 453/251/36  | 0.9232  | 0.1056 |        |
| 80 | SNP 4 | p62140-rs838910            | Intron 7 | T, 0.3047 | GG/GT/TT | 355/304/70  | -0.0759 | 0.7143 |        | 358/304/72  | -0.0755 | 0.8821 |        |
| 81 | SNP 1 | p60255-rs3782287           | Intron 7 | T, 0.2831 | CC/CT/TT | 378/312/51  | 0.2555  | 0.2453 | 0.2078 | 384/314/55  | 0.3715  | 0.4856 | 0.0050 |
| 81 | SNP 2 | p61872-rs838909            | Intron 7 | T, 0.2199 | CC/CT/TT | 449/249/36  | 0.1223  | 0.5945 |        | 453/251/36  | 0.9232  | 0.1056 |        |
| 81 | SNP 3 | p62140-rs838910            | Intron 7 | T, 0.3047 | GG/GT/TT | 355/304/70  | -0.0759 | 0.7143 |        | 358/304/72  | -0.0755 | 0.8821 |        |
| 81 | SNP 4 | p62409-rs838911            | Intron 7 | T, 0.4211 | CC/CT/TT | 247/347/133 | -0.1556 | 0.4213 |        | 251/346/135 | -0.6245 | 0.1888 |        |
| 82 | SNP 1 | p61872-rs838909            | Intron 7 | T, 0.2199 | CC/CT/TT | 449/249/36  | 0.1223  | 0.5945 | 0.1998 | 453/251/36  | 0.9232  | 0.1056 | 0.0137 |
| 82 | SNP 2 | p62140-rs838910            | Intron 7 | T, 0.3047 | GG/GT/TT | 355/304/70  | -0.0759 | 0.7143 |        | 358/304/72  | -0.0755 | 0.8821 |        |
| 82 | SNP 3 | p62409-rs838911            | Intron 7 | T, 0.4211 | CC/CT/TT | 247/347/133 | -0.1556 | 0.4213 |        | 251/346/135 | -0.6245 | 0.1888 |        |
| 82 | SNP 4 | p62615-rs7138386           | Intron 7 | C, 0.1137 | TT/TC/CC | 568/138/12  | -0.2083 | 0.4851 |        | 571/141/11  | -0.6495 | 0.3851 |        |
| 83 | SNP 1 | p62140-rs838910            | Intron 7 | T, 0.3047 | GG/GT/TT | 355/304/70  | -0.0759 | 0.7143 | 0.2052 | 358/304/72  | -0.0755 | 0.8821 | 0.0187 |
| 83 | SNP 2 | p62409-rs838911            | Intron 7 | T, 0.4211 | CC/CT/TT | 247/347/133 | -0.1556 | 0.4213 |        | 251/346/135 | -0.6245 | 0.1888 |        |
| 83 | SNP 3 | p62615-rs7138386           | Intron 7 | C, 0.1137 | TT/TC/CC | 568/138/12  | -0.2083 | 0.4851 |        | 571/141/11  | -0.6495 | 0.3851 |        |
| 83 | SNP 4 | p63483-rs838912            | Intron 7 | A, 0.0867 | AA/GA/GG | 6/117/615   | 0.1814  | 0.5840 |        | 6/119/624   | 1.8700  | 0.0234 |        |
| 84 | SNP 1 | p62409-rs838911            | Intron 7 | T, 0.4211 | CC/CT/TT | 247/347/133 | -0.1556 | 0.4213 | 0.7674 | 251/346/135 | -0.6245 | 0.1888 | 0.1544 |
| 84 | SNP 2 | p62615-rs7138386           | Intron 7 | C, 0.1137 | TT/TC/CC | 568/138/12  | -0.2083 | 0.4851 |        | 571/141/11  | -0.6495 | 0.3851 |        |
| 84 | SNP 3 | p63483-rs838912            | Intron 7 | A, 0.0867 | AA/GA/GG | 6/117/615   | 0.1814  | 0.5840 |        | 6/119/624   | 1.8700  | 0.0234 |        |
| 84 | SNP 4 | p64772-rs5888              | Exon 8   | T, 0.0961 | CC/CT/TT | 605/129/8   | 0.3620  | 0.2561 |        | 614/130/8   | 2.0962  | 0.0080 |        |
| 85 | SNP 1 | p62615-rs7138386           | Intron 7 | C, 0.1137 | TT/TC/CC | 568/138/12  | -0.2083 | 0.4851 | 0.7618 | 571/141/11  | -0.6495 | 0.3851 | 0.1130 |
| 85 | SNP 2 | p63483-rs838912            | Intron 7 | A, 0.0867 | AA/GA/GG | 6/117/615   | 0.1814  | 0.5840 |        | 6/119/624   | 1.8700  | 0.0234 |        |
| 85 | SNP 3 | p64772-rs5888              | Exon 8   | T, 0.0961 | CC/CT/TT | 605/129/8   | 0.3620  | 0.2561 |        | 614/130/8   | 2.0962  | 0.0080 |        |
| 85 | SNP 4 | p64923-rs838915            | Intron 8 | A, 0.1435 | AA/CA/CC | 19/177/539  | -0.0858 | 0.7466 |        | 19/179/547  | -0.3684 | 0.5766 |        |
| 86 | SNP 1 | p63483-rs838912            | Intron 7 | A, 0.0867 | AA/GA/GG | 6/117/615   | 0.1814  | 0.5840 | 0.1859 | 6/119/624   | 1.8700  | 0.0234 | 0.0290 |
| 86 | SNP 2 | p64772-rs5888              | Exon 8   | T, 0.0961 | CC/CT/TT | 605/129/8   | 0.3620  | 0.2561 |        | 614/130/8   | 2.0962  | 0.0080 |        |
| 86 | SNP 3 | p64923-rs838915            | Intron 8 | A, 0.1435 | AA/CA/CC | 19/177/539  | -0.0858 | 0.7466 |        | 19/179/547  | -0.3684 | 0.5766 |        |
| 86 | SNP 4 | p65999-rs12819677          | Intron 8 | A, 0.2813 | GG/GA/AA | 371/310/50  | 0.4021  | 0.0670 |        | 375/309/52  | 0.6769  | 0.2052 |        |
| 87 | SNP 1 | p64772-rs5888              | Exon 8   | T, 0.0961 | CC/CT/TT | 605/129/8   | 0.3620  | 0.2561 | 0.1207 | 614/130/8   | 2.0962  | 0.0080 | 0.0623 |
| 87 | SNP 2 | p64923-rs838915            | Intron 8 | A, 0.1435 | AA/CA/CC | 19/177/539  | -0.0858 | 0.7466 |        | 19/179/547  | -0.3684 | 0.5766 |        |
| 87 | SNP 3 | p65999-rs12819677          | Intron 8 | A, 0.2813 | GG/GA/AA | 371/310/50  | 0.4021  | 0.0670 |        | 375/309/52  | 0.6769  | 0.2052 |        |
| 87 | SNP 4 | p67439-rs961170            | Intron 8 | A, 0.0893 | AA/GA/GG | 11/108/610  | -0.0481 | 0.8812 |        | 11/108/615  | -0.9808 | 0.2211 |        |
| 88 | SNP 1 | p64923-rs838915            | Intron 8 | A, 0.1435 | AA/CA/CC | 19/177/539  | -0.0858 | 0.7466 | 0.2674 | 19/179/547  | -0.3684 | 0.5766 | 0.1964 |
| 88 | SNP 2 | p65999-rs12819677          | Intron 8 | A, 0.2813 | GG/GA/AA | 371/310/50  | 0.4021  | 0.0670 |        | 375/309/52  | 0.6769  | 0.2052 |        |

|     |       |                      |                      |           |          |             |         |        |        |             |         |        |        |
|-----|-------|----------------------|----------------------|-----------|----------|-------------|---------|--------|--------|-------------|---------|--------|--------|
| 88  | SNP 3 | p67439-rs961170      | Intron 8             | A, 0.0893 | AA/GA/GG | 11/108/610  | -0.0481 | 0.8812 |        | 11/108/615  | -0.9808 | 0.2211 |        |
| 88  | SNP 4 | p67700-rs1726374     | Intron 8             | A, 0.1933 | GG/GA/AA | 491/221/35  | 0.2289  | 0.3262 |        | 500/226/32  | 0.3249  | 0.5798 |        |
| 89  | SNP 1 | p65999-rs12819677    | Intron 8             | A, 0.2813 | GG/GA/AA | 371/310/50  | 0.4021  | 0.0670 | 0.2789 | 375/309/52  | 0.6769  | 0.2052 | 0.1543 |
| 89  | SNP 2 | p67439-rs961170      | Intron 8             | A, 0.0893 | AA/GA/GG | 11/108/610  | -0.0481 | 0.8812 |        | 11/108/615  | -0.9808 | 0.2211 |        |
| 89  | SNP 3 | p67700-rs1726374     | Intron 8             | A, 0.1933 | GG/GA/AA | 491/221/35  | 0.2289  | 0.3262 |        | 500/226/32  | 0.3249  | 0.5798 |        |
| 89  | SNP 4 | p69013-rs7135117     | Intron 8             | G, 0.2901 | GG/AG/AA | 75/275/377  | 0.1133  | 0.5758 |        | 74/275/383  | 0.5010  | 0.3196 |        |
| 90  | SNP 1 | p67439-rs961170      | Intron 8             | A, 0.0893 | AA/GA/GG | 11/108/610  | -0.0481 | 0.8812 | 0.4209 | 11/108/615  | -0.9808 | 0.2211 | 0.1317 |
| 90  | SNP 2 | p67700-rs1726374     | Intron 8             | A, 0.1933 | GG/GA/AA | 491/221/35  | 0.2289  | 0.3262 |        | 500/226/32  | 0.3249  | 0.5798 |        |
| 90  | SNP 3 | p69013-rs7135117     | Intron 8             | G, 0.2901 | GG/AG/AA | 75/275/377  | 0.1133  | 0.5758 |        | 74/275/383  | 0.5010  | 0.3196 |        |
| 90  | SNP 4 | p69699-rs10396210    | Intron 8-splice site | A, 0.1511 | AA/GA/GG | 17/186/523  | -0.4778 | 0.0745 |        | 17/188/527  | -1.2921 | 0.0520 |        |
| 91  | SNP 1 | p67700-rs1726374     | Intron 8             | A, 0.1933 | GG/GA/AA | 491/221/35  | 0.2289  | 0.3262 | 0.4715 | 500/226/32  | 0.3249  | 0.5798 | 0.4607 |
| 91  | SNP 2 | p69013-rs7135117     | Intron 8             | G, 0.2901 | GG/AG/AA | 75/275/377  | 0.1133  | 0.5758 |        | 74/275/383  | 0.5010  | 0.3196 |        |
| 91  | SNP 3 | p69699-rs10396210    | Intron 8-splice site | A, 0.1511 | AA/GA/GG | 17/186/523  | -0.4778 | 0.0745 |        | 17/188/527  | -1.2921 | 0.0520 |        |
| 91  | SNP 4 | p69995delC-rs5801571 | Intron 9             | 0.2761    | DD/WD/WW | 63/281/386  | 0.0614  | 0.7724 |        | 63/282/394  | 0.2920  | 0.5768 |        |
| 92  | SNP 1 | p69013-rs7135117     | Intron 8             | G, 0.2901 | GG/AG/AA | 75/275/377  | 0.1133  | 0.5758 | 0.2848 | 74/275/383  | 0.5010  | 0.3196 | 0.4449 |
| 92  | SNP 2 | p69699-rs10396210    | Intron 8-splice site | A, 0.1511 | AA/GA/GG | 17/186/523  | -0.4778 | 0.0745 |        | 17/188/527  | -1.2921 | 0.0520 |        |
| 92  | SNP 3 | p69995delC-rs5801571 | Intron 9             | 0.2761    | DD/WD/WW | 63/281/386  | 0.0614  | 0.7724 |        | 63/282/394  | 0.2920  | 0.5768 |        |
| 92  | SNP 4 | p71867-rs7954022     | Intron 9             | T, 0.1323 | TT/CT/CC | 11/172/552  | 0.3876  | 0.1764 |        | 12/172/556  | 0.8502  | 0.2241 |        |
| 93  | SNP 1 | p69699-rs10396210    | Intron 8-splice site | A, 0.1511 | AA/GA/GG | 17/186/523  | -0.4778 | 0.0745 | 0.6336 | 17/188/527  | -1.2921 | 0.0520 | 0.2477 |
| 93  | SNP 2 | p69995delC-rs5801571 | Intron 9             | 0.2761    | DD/WD/WW | 63/281/386  | 0.0614  | 0.7724 |        | 63/282/394  | 0.2920  | 0.5768 |        |
| 93  | SNP 3 | p71867-rs7954022     | Intron 9             | T, 0.1323 | TT/CT/CC | 11/172/552  | 0.3876  | 0.1764 |        | 12/172/556  | 0.8502  | 0.2241 |        |
| 93  | SNP 4 | p72197-rs838861      | Intron 9             | G, 0.3777 | AA/AG/GG | 300/308/123 | -0.1415 | 0.4527 |        | 304/310/122 | -0.1507 | 0.7464 |        |
| 94  | SNP 1 | p69995delC-rs5801571 | Intron 9             | 0.2761    | DD/WD/WW | 63/281/386  | 0.0614  | 0.7724 | 0.7410 | 63/282/394  | 0.2920  | 0.5768 | 0.3380 |
| 94  | SNP 2 | p71867-rs7954022     | Intron 9             | T, 0.1323 | TT/CT/CC | 11/172/552  | 0.3876  | 0.1764 |        | 12/172/556  | 0.8502  | 0.2241 |        |
| 94  | SNP 3 | p72197-rs838861      | Intron 9             | G, 0.3777 | AA/AG/GG | 300/308/123 | -0.1415 | 0.4527 |        | 304/310/122 | -0.1507 | 0.7464 |        |
| 94  | SNP 4 | p72777-rs838862      | Intron 9             | T, 0.0887 | CC/CT/TT | 607/115/7   | 0.1013  | 0.7613 |        | 611/116/7   | 0.7012  | 0.3938 |        |
| 95  | SNP 1 | p71867-rs7954022     | Intron 9             | T, 0.1323 | TT/CT/CC | 11/172/552  | 0.3876  | 0.1764 | 0.1054 | 12/172/556  | 0.8502  | 0.2241 | 0.0131 |
| 95  | SNP 2 | p72197-rs838861      | Intron 9             | G, 0.3777 | AA/AG/GG | 300/308/123 | -0.1415 | 0.4527 |        | 304/310/122 | -0.1507 | 0.7464 |        |
| 95  | SNP 3 | p72777-rs838862      | Intron 9             | T, 0.0887 | CC/CT/TT | 607/115/7   | 0.1013  | 0.7613 |        | 611/116/7   | 0.7012  | 0.3938 |        |
| 95  | SNP 4 | p75766-rs838866      | Intron 9             | C, 0.2116 | TT/TC/CC | 457/239/38  | -0.1058 | 0.6423 |        | 466/240/37  | -0.0497 | 0.9306 |        |
| 96  | SNP 1 | p72197-rs838861      | Intron 9             | G, 0.3777 | AA/AG/GG | 300/308/123 | -0.1415 | 0.4527 | 0.4137 | 304/310/122 | -0.1507 | 0.7464 | 0.0484 |
| 96  | SNP 2 | p72777-rs838862      | Intron 9             | T, 0.0887 | CC/CT/TT | 607/115/7   | 0.1013  | 0.7613 |        | 611/116/7   | 0.7012  | 0.3938 |        |
| 96  | SNP 3 | p75766-rs838866      | Intron 9             | C, 0.2116 | TT/TC/CC | 457/239/38  | -0.1058 | 0.6423 |        | 466/240/37  | -0.0497 | 0.9306 |        |
| 96  | SNP 4 | p75778-rs7301120     | Intron 9             | T, 0.1135 | TT/CT/CC | 9/147/563   | -0.2367 | 0.4366 |        | 9/146/569   | 0.3767  | 0.6174 |        |
| 97  | SNP 1 | p72777-rs838862      | Intron 9             | T, 0.0887 | CC/CT/TT | 607/115/7   | 0.1013  | 0.7613 | 0.0867 | 611/116/7   | 0.7012  | 0.3938 | 0.0098 |
| 97  | SNP 2 | p75766-rs838866      | Intron 9             | C, 0.2116 | TT/TC/CC | 457/239/38  | -0.1058 | 0.6423 |        | 466/240/37  | -0.0497 | 0.9306 |        |
| 97  | SNP 3 | p75778-rs7301120     | Intron 9             | T, 0.1135 | TT/CT/CC | 9/147/563   | -0.2367 | 0.4366 |        | 9/146/569   | 0.3767  | 0.6174 |        |
| 97  | SNP 4 | p76757-rs9919713     | Intron 9             | T, 0.439  | AA/AT/TT | 235/347/151 | -0.1264 | 0.5044 |        | 243/353/148 | -0.1860 | 0.6921 |        |
| 98  | SNP 1 | p75766-rs838866      | Intron 9             | C, 0.2116 | TT/TC/CC | 457/239/38  | -0.1058 | 0.6423 | 0.5187 | 466/240/37  | -0.0497 | 0.9306 | 0.7976 |
| 98  | SNP 2 | p75778-rs7301120     | Intron 9             | T, 0.1135 | TT/CT/CC | 9/147/563   | -0.2367 | 0.4366 |        | 9/146/569   | 0.3767  | 0.6174 |        |
| 98  | SNP 3 | p76757-rs9919713     | Intron 9             | T, 0.439  | AA/AT/TT | 235/347/151 | -0.1264 | 0.5044 |        | 243/353/148 | -0.1860 | 0.6921 |        |
| 98  | SNP 4 | p77181-rs146246031   | Intron 9             | C, 0.0053 | TC/TT    | 6/731       | -0.6173 | 0.6809 |        | 8/734       | 0.4564  | 0.8874 |        |
| 99  | SNP 1 | p75778-rs7301120     | Intron 9             | T, 0.1135 | TT/CT/CC | 9/147/563   | -0.2367 | 0.4366 | 0.7604 | 9/146/569   | 0.3767  | 0.6174 | 0.5753 |
| 99  | SNP 2 | p76757-rs9919713     | Intron 9             | T, 0.439  | AA/AT/TT | 235/347/151 | -0.1264 | 0.5044 |        | 243/353/148 | -0.1860 | 0.6921 |        |
| 99  | SNP 3 | p77181-rs146246031   | Intron 9             | C, 0.0053 | TC/TT    | 6/731       | -0.6173 | 0.6809 |        | 8/734       | 0.4564  | 0.8874 |        |
| 99  | SNP 4 | p77251-rs34339961    | Intron 9             | T, 0.1177 | AA/AT/TT | 561/151/11  | -0.1372 | 0.6426 |        | 573/150/11  | 0.7120  | 0.3383 |        |
| 100 | SNP 1 | p76757-rs9919713     | Intron 9             | T, 0.439  | AA/AT/TT | 235/347/151 | -0.1264 | 0.5044 | 0.8818 | 243/353/148 | -0.1860 | 0.6921 | 0.6540 |
| 100 | SNP 2 | p77181-rs146246031   | Intron 9             | C, 0.0053 | TC/TT    | 6/731       | -0.6173 | 0.6809 |        | 8/734       | 0.4564  | 0.8874 |        |
| 100 | SNP 3 | p77251-rs34339961    | Intron 9             | T, 0.1177 | AA/AT/TT | 561/151/11  | -0.1372 | 0.6426 |        | 573/150/11  | 0.7120  | 0.3383 |        |
| 100 | SNP 4 | p77381-rs138499966   | Intron 9             | C, 0.0046 | TC/TT    | 7/735       | 1.5523  | 0.2652 |        | 7/741       | -0.2236 | 0.9485 |        |
| 101 | SNP 1 | p77181-rs146246031   | Intron 9             | C, 0.0053 | TC/TT    | 6/731       | -0.6173 | 0.6809 | 0.7886 | 8/734       | 0.4564  | 0.8874 | 0.6293 |
| 101 | SNP 2 | p77251-rs34339961    | Intron 9             | T, 0.1177 | AA/AT/TT | 561/151/11  | -0.1372 | 0.6426 |        | 573/150/11  | 0.7120  | 0.3383 |        |
| 101 | SNP 3 | p77381-rs138499966   | Intron 9             | C, 0.0046 | TC/TT    | 7/735       | 1.5523  | 0.2652 |        | 7/741       | -0.2236 | 0.9485 |        |
| 101 | SNP 4 | p77620-rs377124254   | Intron 10            | A, 0.0007 | GA/GG    | 1/735       | 11.5518 | 0.0016 |        | 1/741       | 14.4685 | 0.1141 |        |
| 102 | SNP 1 | p77251-rs34339961    | Intron 9             | T, 0.1177 | AA/AT/TT | 561/151/11  | -0.1372 | 0.6426 | 0.5420 | 573/150/11  | 0.7120  | 0.3383 | 0.4369 |
| 102 | SNP 2 | p77381-rs138499966   | Intron 9             | C, 0.0046 | TC/TT    | 7/735       | 1.5523  | 0.2652 |        | 7/741       | -0.2236 | 0.9485 |        |
| 102 | SNP 3 | p77620-rs377124254   | Intron 10            | A, 0.0007 | GA/GG    | 1/735       | 11.5518 | 0.0016 |        | 1/741       | 14.4685 | 0.1141 |        |

|     |       |                                              |           |           |          |             |         |        |        |             |         |        |        |
|-----|-------|----------------------------------------------|-----------|-----------|----------|-------------|---------|--------|--------|-------------|---------|--------|--------|
| 102 | SNP 4 | p77682-<br>rs150082885                       | Intron 10 | G, 0.0106 | AA/AG/GG | 716/13/1    | -0.5377 | 0.5509 |        | 721/14/1    | -2.9877 | 0.1698 |        |
| 103 | SNP 1 | p77381-<br>rs138499966                       | Intron 9  | C, 0.0046 | TC/TT    | 7/735       | 1.5523  | 0.2652 | 0.8039 | 7/741       | -0.2236 | 0.9485 | 0.3187 |
| 103 | SNP 2 | p77620-rs377124254<br>p77682-<br>rs150082885 | Intron 10 | A, 0.0007 | GA/GG    | 1/735       | 11.5518 | 0.0016 |        | 1/741       | 14.4685 | 0.1141 |        |
| 103 | SNP 3 | p77704-<br>chr12_125271816                   | Intron 10 | G, 0.0106 | AA/AG/GG | 716/13/1    | -0.5377 | 0.5509 |        | 721/14/1    | -2.9877 | 0.1698 |        |
| 103 | SNP 4 | p77682-<br>rs150082885                       | Intron 10 | A, 0.004  | CA/CC    | 5/726       | -1.4602 | 0.3791 |        | 6/731       | -3.0744 | 0.4152 |        |
| 104 | SNP 1 | p77620-rs377124254<br>p77682-<br>rs150082885 | Intron 10 | A, 0.0007 | GA/GG    | 1/735       | 11.5518 | 0.0016 | 0.7533 | 1/741       | 14.4685 | 0.1141 | 0.3571 |
| 104 | SNP 2 | p77704-<br>chr12_125271816                   | Intron 10 | G, 0.0106 | AA/AG/GG | 716/13/1    | -0.5377 | 0.5509 |        | 721/14/1    | -2.9877 | 0.1698 |        |
| 104 | SNP 3 | p77842-rs2272310                             | Intron 10 | A, 0.004  | CA/CC    | 5/726       | -1.4602 | 0.3791 |        | 6/731       | -3.0744 | 0.4152 |        |
| 104 | SNP 4 | p77682-<br>rs150082885                       | Intron 10 | A, 0.0807 | AA/GA/GG | 5/110/630   | 0.2011  | 0.5651 |        | 5/110/642   | 0.8339  | 0.3359 |        |
| 105 | SNP 1 | p77704-<br>chr12_125271816                   | Intron 10 | G, 0.0106 | AA/AG/GG | 716/13/1    | -0.5377 | 0.5509 | 0.8340 | 721/14/1    | -2.9877 | 0.1698 | 0.4218 |
| 105 | SNP 2 | p77842-rs2272310<br>p78255-<br>rs184052375   | Intron 10 | A, 0.004  | CA/CC    | 5/726       | -1.4602 | 0.3791 |        | 6/731       | -3.0744 | 0.4152 |        |
| 105 | SNP 3 | p78255-<br>rs184052375                       | Intron 10 | A, 0.0807 | AA/GA/GG | 5/110/630   | 0.2011  | 0.5651 |        | 5/110/642   | 0.8339  | 0.3359 |        |
| 105 | SNP 4 | p78402-rs838898                              | Intron 10 | G, 0.0072 | AA/AG    | 732/11      | 1.1808  | 0.2893 |        | 740/9       | 3.3097  | 0.2790 |        |
| 106 | SNP 1 | p77704-<br>chr12_125271816                   | Intron 10 | A, 0.004  | CA/CC    | 5/726       | -1.4602 | 0.3791 | 0.9158 | 6/731       | -3.0744 | 0.4152 | 0.3479 |
| 106 | SNP 2 | p77842-rs2272310<br>p78255-<br>rs184052375   | Intron 10 | A, 0.0807 | AA/GA/GG | 5/110/630   | 0.2011  | 0.5651 |        | 5/110/642   | 0.8339  | 0.3359 |        |
| 106 | SNP 3 | p78402-rs838898                              | Intron 10 | G, 0.0072 | AA/AG    | 732/11      | 1.1808  | 0.2893 |        | 740/9       | 3.3097  | 0.2790 |        |
| 106 | SNP 4 | p78402-rs838898                              | Intron 10 | A, 0.0714 | AA/GA/GG | 7/86/594    | -0.0602 | 0.8720 |        | 7/86/601    | -0.9806 | 0.2889 |        |
| 107 | SNP 1 | p77842-rs2272310<br>p78255-<br>rs184052375   | Intron 10 | A, 0.0807 | AA/GA/GG | 5/110/630   | 0.2011  | 0.5651 | 0.8730 | 5/110/642   | 0.8339  | 0.3359 | 0.5898 |
| 107 | SNP 2 | p78402-rs838898                              | Intron 10 | G, 0.0072 | AA/AG    | 732/11      | 1.1808  | 0.2893 |        | 740/9       | 3.3097  | 0.2790 |        |
| 107 | SNP 3 | p78402-rs838898                              | Intron 10 | A, 0.0714 | AA/GA/GG | 7/86/594    | -0.0602 | 0.8720 |        | 7/86/601    | -0.9806 | 0.2889 |        |
| 107 | SNP 4 | p78430-rs838897                              | Intron 10 | G, 0.383  | GG/CG/CC | 125/308/291 | 0.0070  | 0.9704 |        | 121/315/299 | -0.1887 | 0.6887 |        |
| 108 | SNP 1 | p78255-<br>rs184052375                       | Intron 10 | G, 0.0072 | AA/AG    | 732/11      | 1.1808  | 0.2893 | 0.4248 | 740/9       | 3.3097  | 0.2790 | 0.0975 |
| 108 | SNP 2 | p78402-rs838898                              | Intron 10 | A, 0.0714 | AA/GA/GG | 7/86/594    | -0.0602 | 0.8720 |        | 7/86/601    | -0.9806 | 0.2889 |        |
| 108 | SNP 3 | p78430-rs838897                              | Intron 10 | G, 0.383  | GG/CG/CC | 125/308/291 | 0.0070  | 0.9704 |        | 121/315/299 | -0.1887 | 0.6887 |        |
| 108 | SNP 4 | p78747-rs2293440                             | Intron 11 | C, 0.4112 | CC/TC/TT | 128/342/252 | -0.1684 | 0.3806 |        | 126/348/258 | -0.2984 | 0.5352 |        |
| 109 | SNP 1 | p78402-rs838898                              | Intron 10 | A, 0.0714 | AA/GA/GG | 7/86/594    | -0.0602 | 0.8720 | 0.4162 | 7/86/601    | -0.9806 | 0.2889 | 0.0195 |
| 109 | SNP 2 | p78430-rs838897                              | Intron 10 | G, 0.383  | GG/CG/CC | 125/308/291 | 0.0070  | 0.9704 |        | 121/315/299 | -0.1887 | 0.6887 |        |
| 109 | SNP 3 | p78747-rs2293440                             | Intron 11 | C, 0.4112 | CC/TC/TT | 128/342/252 | -0.1684 | 0.3806 |        | 126/348/258 | -0.2984 | 0.5352 |        |
| 109 | SNP 4 | p78791-rs75289200                            | Intron 11 | C, 0.0321 | TC/TT    | 46/679      | 0.7037  | 0.2078 |        | 46/685      | 3.6568  | 0.0086 |        |
| 110 | SNP 1 | p78430-rs838897                              | Intron 10 | G, 0.383  | GG/CG/CC | 125/308/291 | 0.0070  | 0.9704 | 0.1013 | 121/315/299 | -0.1887 | 0.6887 | 0.0012 |
| 110 | SNP 2 | p78747-rs2293440                             | Intron 11 | C, 0.4112 | CC/TC/TT | 128/342/252 | -0.1684 | 0.3806 |        | 126/348/258 | -0.2984 | 0.5352 |        |
| 110 | SNP 3 | p78791-rs75289200                            | Intron 11 | C, 0.0321 | TC/TT    | 46/679      | 0.7037  | 0.2078 |        | 46/685      | 3.6568  | 0.0086 |        |
| 110 | SNP 4 | p79721-rs838896                              | Intron 11 | C, 0.3104 | GG/CG/CC | 349/319/73  | 0.3565  | 0.0817 |        | 357/324/71  | 1.1147  | 0.0278 |        |
| 111 | SNP 1 | p78747-rs2293440                             | Intron 11 | C, 0.4112 | CC/TC/TT | 128/342/252 | -0.1684 | 0.3806 | 0.0040 | 126/348/258 | -0.2984 | 0.5352 | 0.0038 |
| 111 | SNP 2 | p78791-rs75289200                            | Intron 11 | C, 0.0321 | TC/TT    | 46/679      | 0.7037  | 0.2078 |        | 46/685      | 3.6568  | 0.0086 |        |
| 111 | SNP 3 | p79721-rs838896                              | Intron 11 | C, 0.3104 | GG/CG/CC | 349/319/73  | 0.3565  | 0.0817 |        | 357/324/71  | 1.1147  | 0.0278 |        |
| 111 | SNP 4 | p79828-rs838895                              | Intron 11 | G, 0.3171 | GG/CG/CC | 74/322/337  | 0.4961  | 0.0162 |        | 73/325/345  | 1.2206  | 0.0164 |        |
| 112 | SNP 1 | p78791-rs75289200                            | Intron 11 | C, 0.0321 | TC/TT    | 46/679      | 0.7037  | 0.2078 | 0.0055 | 46/685      | 3.6568  | 0.0086 | 0.0412 |
| 112 | SNP 2 | p79721-rs838896                              | Intron 11 | C, 0.3104 | GG/CG/CC | 349/319/73  | 0.3565  | 0.0817 |        | 357/324/71  | 1.1147  | 0.0278 |        |
| 112 | SNP 3 | p79828-rs838895                              | Intron 11 | G, 0.3171 | GG/CG/CC | 74/322/337  | 0.4961  | 0.0162 |        | 73/325/345  | 1.2206  | 0.0164 |        |
| 112 | SNP 4 | p80045-rs838893                              | Intron 11 | A, 0.3244 | GG/GA/AA | 335/325/81  | 0.3127  | 0.1224 |        | 344/328/80  | 0.8859  | 0.0774 |        |
| 113 | SNP 1 | p79721-rs838896                              | Intron 11 | C, 0.3104 | GG/CG/CC | 349/319/73  | 0.3565  | 0.0817 | 0.0048 | 357/324/71  | 1.1147  | 0.0278 | 0.1581 |
| 113 | SNP 2 | p79828-rs838895                              | Intron 11 | G, 0.3171 | GG/CG/CC | 74/322/337  | 0.4961  | 0.0162 |        | 73/325/345  | 1.2206  | 0.0164 |        |
| 113 | SNP 3 | p80045-rs838893<br>p81863-<br>rs185445624    | Intron 11 | A, 0.3244 | GG/GA/AA | 335/325/81  | 0.3127  | 0.1224 |        | 344/328/80  | 0.8859  | 0.0774 |        |
| 113 | SNP 4 | p81863-<br>rs185445624                       | Intron 11 | A, 0.002  | GA/GG    | 3/739       | -0.9612 | 0.6510 |        | 3/745       | -2.5166 | 0.6333 |        |
| 114 | SNP 1 | p79828-rs838895                              | Intron 11 | G, 0.3171 | GG/CG/CC | 74/322/337  | 0.4961  | 0.0162 | 0.0447 | 73/325/345  | 1.2206  | 0.0164 | 0.1200 |
| 114 | SNP 2 | p80045-rs838893<br>p81863-<br>rs185445624    | Intron 11 | A, 0.3244 | GG/GA/AA | 335/325/81  | 0.3127  | 0.1224 |        | 344/328/80  | 0.8859  | 0.0774 |        |
| 114 | SNP 3 | p81863-<br>rs185445624                       | Intron 11 | A, 0.002  | GA/GG    | 3/739       | -0.9612 | 0.6510 |        | 3/745       | -2.5166 | 0.6333 |        |
| 114 | SNP 4 | p82019-rs838890                              | Intron 11 | T, 0.032  | CC/CT/TT | 683/42/2    | -1.0051 | 0.0618 |        | 690/41/2    | -1.1864 | 0.3782 |        |
| 115 | SNP 1 | p80045-rs838893<br>p81863-<br>rs185445624    | Intron 11 | A, 0.3244 | GG/GA/AA | 335/325/81  | 0.3127  | 0.1224 | 0.0934 | 344/328/80  | 0.8859  | 0.0774 | 0.2923 |
| 115 | SNP 2 | p81863-<br>rs185445624                       | Intron 11 | A, 0.002  | GA/GG    | 3/739       | -0.9612 | 0.6510 |        | 3/745       | -2.5166 | 0.6333 |        |
| 115 | SNP 3 | p82019-rs838890<br>p82264-<br>rs141545424    | Intron 11 | T, 0.032  | CC/CT/TT | 683/42/2    | -1.0051 | 0.0618 |        | 690/41/2    | -1.1864 | 0.3782 |        |
| 115 | SNP 4 | p82264-<br>rs141545424                       | Exon 12   | A, 0.0007 | CA/CC    | 1/739       | 11.5850 | 0.0016 |        | 1/745       | 14.4986 | 0.1119 |        |
| 116 | SNP 1 | p81863-<br>rs185445624                       | Intron 11 | A, 0.002  | GA/GG    | 3/739       | -0.9612 | 0.6510 | 0.0537 | 3/745       | -2.5166 | 0.6333 | 0.5297 |
| 116 | SNP 2 | p82019-rs838890<br>p82264-<br>rs141545424    | Intron 11 | T, 0.032  | CC/CT/TT | 683/42/2    | -1.0051 | 0.0618 |        | 690/41/2    | -1.1864 | 0.3782 |        |
| 116 | SNP 3 | p81863-<br>rs185445624                       | Exon 12   | A, 0.0007 | CA/CC    | 1/739       | 11.5850 | 0.0016 |        | 1/745       | 14.4986 | 0.1119 |        |



|     |       |                    |                             |           |          |             |         |        |               |             |         |        |               |
|-----|-------|--------------------|-----------------------------|-----------|----------|-------------|---------|--------|---------------|-------------|---------|--------|---------------|
| 116 | SNP 4 | p82340-rs77483223  | Intron 12                   | A, 0.0231 | GA/GG    | 35/699      | -1.0458 | 0.1012 |               | 35/705      | -1.5601 | 0.3268 |               |
| 117 | SNP 1 | p82019-rs838890    | Intron 11                   | T, 0.032  | CC/CT/TT | 683/42/2    | -1.0051 | 0.0618 | <b>0.0433</b> | 690/41/2    | -1.1864 | 0.3782 | 0.3386        |
| 117 | SNP 2 | p82264-rs141545424 | Exon 12                     | A, 0.0007 | CA/CC    | 1/739       | 11.5850 | 0.0016 |               | 1/745       | 14.4986 | 0.1119 |               |
| 117 | SNP 3 | p82340-rs77483223  | Intron 12                   | A, 0.0231 | GA/GG    | 35/699      | -1.0458 | 0.1012 |               | 35/705      | -1.5601 | 0.3268 |               |
| 117 | SNP 4 | p82369-rs75446635  | Intron 12                   | A, 0.0059 | GA/GG    | 9/733       | 0.5896  | 0.6322 |               | 9/739       | 2.2239  | 0.4660 |               |
| 118 | SNP 1 | p82264-rs141545424 | Exon 12                     | A, 0.0007 | CA/CC    | 1/739       | 11.5850 | 0.0016 | <b>0.0375</b> | 1/745       | 14.4986 | 0.1119 | 0.3863        |
| 118 | SNP 2 | p82340-rs77483223  | Intron 12                   | A, 0.0231 | GA/GG    | 35/699      | -1.0458 | 0.1012 |               | 35/705      | -1.5601 | 0.3268 |               |
| 118 | SNP 3 | p82369-rs75446635  | Intron 12                   | A, 0.0059 | GA/GG    | 9/733       | 0.5896  | 0.6322 |               | 9/739       | 2.2239  | 0.4660 |               |
| 118 | SNP 4 | p82434-rs838889    | Intron 12                   | C, 0.0315 | CC/TC/TT | 2/42/695    | -1.0389 | 0.0526 |               | 2/41/702    | -0.9096 | 0.4967 |               |
| 119 | SNP 1 | p82340-rs77483223  | Intron 12                   | A, 0.0231 | GA/GG    | 35/699      | -1.0458 | 0.1012 | 0.2138        | 35/705      | -1.5601 | 0.3268 | 0.7897        |
| 119 | SNP 2 | p82369-rs75446635  | Intron 12                   | A, 0.0059 | GA/GG    | 9/733       | 0.5896  | 0.6322 |               | 9/739       | 2.2239  | 0.4660 |               |
| 119 | SNP 3 | p82434-rs838889    | Intron 12                   | C, 0.0315 | CC/TC/TT | 2/42/695    | -1.0389 | 0.0526 |               | 2/41/702    | -0.9096 | 0.4967 |               |
| 119 | SNP 4 | p83547-rs838887    | Intron 12                   | G, 0.4564 | CC/CG/GG | 225/357/154 | 0.1202  | 0.5267 |               | 227/358/157 | -0.1113 | 0.8119 |               |
| 120 | SNP 1 | p82369-rs75446635  | Intron 12                   | A, 0.0059 | GA/GG    | 9/733       | 0.5896  | 0.6322 | 0.3753        | 9/739       | 2.2239  | 0.4660 | 0.2078        |
| 120 | SNP 2 | p82434-rs838889    | Intron 12                   | C, 0.0315 | CC/TC/TT | 2/42/695    | -1.0389 | 0.0526 |               | 2/41/702    | -0.9096 | 0.4967 |               |
| 120 | SNP 3 | p83547-rs838887    | Intron 12                   | G, 0.4564 | CC/CG/GG | 225/357/154 | 0.1202  | 0.5267 |               | 227/358/157 | -0.1113 | 0.8119 |               |
| 120 | SNP 4 | p83884-rs701106    | Intron 12                   | T, 0.2597 | TT/CT/CC | 49/289/405  | 0.2471  | 0.2601 |               | 51/291/412  | 1.2967  | 0.0156 |               |
| 121 | SNP 1 | p82434-rs838889    | Intron 12                   | C, 0.0315 | CC/TC/TT | 2/42/695    | -1.0389 | 0.0526 | 0.2565        | 2/41/702    | -0.9096 | 0.4967 | 0.1513        |
| 121 | SNP 2 | p83547-rs838887    | Intron 12                   | G, 0.4564 | CC/CG/GG | 225/357/154 | 0.1202  | 0.5267 |               | 227/358/157 | -0.1113 | 0.8119 |               |
| 121 | SNP 3 | p83884-rs701106    | Intron 12                   | T, 0.2597 | TT/CT/CC | 49/289/405  | 0.2471  | 0.2601 |               | 51/291/412  | 1.2967  | 0.0156 |               |
| 121 | SNP 4 | p86245-rs188375019 | Intron 12                   | T, 0.0341 | CC/CT    | 690/50      | 0.7447  | 0.1639 |               | 696/50      | 1.8399  | 0.1674 |               |
| 122 | SNP 1 | p83547-rs838887    | Intron 12                   | G, 0.4564 | CC/CG/GG | 225/357/154 | 0.1202  | 0.5267 | 0.3275        | 227/358/157 | -0.1113 | 0.8119 | 0.2640        |
| 122 | SNP 2 | p83884-rs701106    | Intron 12                   | T, 0.2597 | TT/CT/CC | 49/289/405  | 0.2471  | 0.2601 |               | 51/291/412  | 1.2967  | 0.0156 |               |
| 122 | SNP 3 | p86245-rs188375019 | Intron 12                   | T, 0.0341 | CC/CT    | 690/50      | 0.7447  | 0.1639 |               | 696/50      | 1.8399  | 0.1674 |               |
| 122 | SNP 4 | p86276-rs747155    | Intron 12                   | T, 0.1495 | TT/CT/CC | 17/187/533  | 0.2793  | 0.2980 |               | 17/191/541  | -0.2164 | 0.7433 |               |
| 123 | SNP 1 | p83884-rs701106    | Intron 12                   | T, 0.2597 | TT/CT/CC | 49/289/405  | 0.2471  | 0.2601 | <b>0.0386</b> | 51/291/412  | 1.2967  | 0.0156 | <b>0.0468</b> |
| 123 | SNP 2 | p86245-rs188375019 | Intron 12                   | T, 0.0341 | CC/CT    | 690/50      | 0.7447  | 0.1639 |               | 696/50      | 1.8399  | 0.1674 |               |
| 123 | SNP 3 | p86276-rs747155    | Intron 12                   | T, 0.1495 | TT/CT/CC | 17/187/533  | 0.2793  | 0.2980 |               | 17/191/541  | -0.2164 | 0.7433 |               |
| 123 | SNP 4 | p86316-rs701104    | Intron 12                   | T, 0.0487 | TT/GT/GG | 2/66/643    | -0.9838 | 0.0286 |               | 2/64/658    | -0.6627 | 0.5579 |               |
| 124 | SNP 1 | p86245-rs188375019 | Intron 12                   | T, 0.0341 | CC/CT    | 690/50      | 0.7447  | 0.1639 | <b>0.0368</b> | 696/50      | 1.8399  | 0.1674 | 0.2216        |
| 124 | SNP 2 | p86276-rs747155    | Intron 12                   | T, 0.1495 | TT/CT/CC | 17/187/533  | 0.2793  | 0.2980 |               | 17/191/541  | -0.2164 | 0.7433 |               |
| 124 | SNP 3 | p86316-rs701104    | Intron 12                   | T, 0.0487 | TT/GT/GG | 2/66/643    | -0.9838 | 0.0286 |               | 2/64/658    | -0.6627 | 0.5579 |               |
| 124 | SNP 4 | p86481-rs701103    | Exon 13-3' UTR              | A, 0.2451 | AA/GA/GG | 50/259/424  | 0.1642  | 0.4492 |               | 50/265/428  | -0.0074 | 0.9891 |               |
| 125 | SNP 1 | p86276-rs747155    | Intron 12                   | T, 0.1495 | TT/CT/CC | 17/187/533  | 0.2793  | 0.2980 | <b>0.0307</b> | 17/191/541  | -0.2164 | 0.7433 | 0.2769        |
| 125 | SNP 2 | p86316-rs701104    | Intron 12                   | T, 0.0487 | TT/GT/GG | 2/66/643    | -0.9838 | 0.0286 |               | 2/64/658    | -0.6627 | 0.5579 |               |
| 125 | SNP 3 | p86481-rs701103    | Exon 13-3' UTR              | A, 0.2451 | AA/GA/GG | 50/259/424  | 0.1642  | 0.4492 |               | 50/265/428  | -0.0074 | 0.9891 |               |
| 125 | SNP 4 | p86967-rs187492239 | Exon 13-3' UTR              | G, 0.0355 | AA/AG    | 686/52      | 0.7743  | 0.1412 |               | 692/52      | 1.3818  | 0.2924 |               |
| 126 | SNP 1 | p86316-rs701104    | Intron 12                   | T, 0.0487 | TT/GT/GG | 2/66/643    | -0.9838 | 0.0286 | 0.1487        | 2/64/658    | -0.6627 | 0.5579 | 0.1998        |
| 126 | SNP 2 | p86481-rs701103    | Exon 13-3' UTR              | A, 0.2451 | AA/GA/GG | 50/259/424  | 0.1642  | 0.4492 |               | 50/265/428  | -0.0074 | 0.9891 |               |
| 126 | SNP 3 | p86967-rs187492239 | Exon 13-3' UTR              | G, 0.0355 | AA/AG    | 686/52      | 0.7743  | 0.1412 |               | 692/52      | 1.3818  | 0.2924 |               |
| 126 | SNP 4 | p87011-rs58032386  | Exon 13-3' UTR              | T, 0.1417 | CC/CT/TT | 544/183/14  | 0.0575  | 0.8333 |               | 551/186/14  | -0.2769 | 0.6829 |               |
| 127 | SNP 1 | p86481-rs701103    | Exon 13-3' UTR              | A, 0.2451 | AA/GA/GG | 50/259/424  | 0.1642  | 0.4492 | 0.4750        | 50/265/428  | -0.0074 | 0.9891 | 0.8693        |
| 127 | SNP 2 | p86967-rs187492239 | Exon 13-3' UTR              | G, 0.0355 | AA/AG    | 686/52      | 0.7743  | 0.1412 |               | 692/52      | 1.3818  | 0.2924 |               |
| 127 | SNP 3 | p87011-rs58032386  | Exon 13-3' UTR              | T, 0.1417 | CC/CT/TT | 544/183/14  | 0.0575  | 0.8333 |               | 551/186/14  | -0.2769 | 0.6829 |               |
| 127 | SNP 4 | p87266-rs150512235 | Exon 13-3' UTR <sup>d</sup> | C, 0.0057 | TC/TT    | 9/746       | -0.0325 | 0.9789 |               | 9/756       | 0.0318  | 0.9917 |               |
| 128 | SNP 1 | p86967-rs187492239 | Exon 13-3' UTR              | G, 0.0355 | AA/AG    | 686/52      | 0.7743  | 0.1412 | 0.4515        | 692/52      | 1.3818  | 0.2924 | 0.5899        |
| 128 | SNP 2 | p87011-rs58032386  | Exon 13-3' UTR              | T, 0.1417 | CC/CT/TT | 544/183/14  | 0.0575  | 0.8333 |               | 551/186/14  | -0.2769 | 0.6829 |               |
| 128 | SNP 3 | p87266-rs150512235 | Exon 13-3' UTR <sup>d</sup> | C, 0.0057 | TC/TT    | 9/746       | -0.0325 | 0.9789 |               | 9/756       | 0.0318  | 0.9917 |               |
| 128 | SNP 4 | p87611-rs190688220 | 3' flanking                 | T, 0.0316 | CC/CT    | 691/46      | 0.8329  | 0.1355 |               | 697/46      | 1.7851  | 0.1993 |               |
| 129 | SNP 1 | p87011-rs58032386  | Exon 13-3' UTR              | T, 0.1417 | CC/CT/TT | 544/183/14  | 0.0575  | 0.8333 | 0.1918        | 551/186/14  | -0.2769 | 0.6829 | 0.7888        |
| 129 | SNP 2 | p87266-rs150512235 | Exon 13-3' UTR <sup>d</sup> | C, 0.0057 | TC/TT    | 9/746       | -0.0325 | 0.9789 |               | 9/756       | 0.0318  | 0.9917 |               |
| 129 | SNP 3 | p87611-rs190688220 | 3' flanking                 | T, 0.0316 | CC/CT    | 691/46      | 0.8329  | 0.1355 |               | 697/46      | 1.7851  | 0.1993 |               |
| 129 | SNP 4 | p87681-rs838883    | 3' flanking                 | A, 0.0459 | AA/GA/GG | 1/65/646    | -0.9433 | 0.0427 |               | 1/62/659    | -0.0535 | 0.9639 |               |
| 130 | SNP 1 | p87266-rs150512235 | Exon 13-3' UTR <sup>d</sup> | C, 0.0057 | TC/TT    | 9/746       | -0.0325 | 0.9789 | 0.0787        | 9/756       | 0.0318  | 0.9917 | 0.5394        |
| 130 | SNP 2 | p87611-rs190688220 | 3' flanking                 | T, 0.0316 | CC/CT    | 691/46      | 0.8329  | 0.1355 |               | 697/46      | 1.7851  | 0.1993 |               |

|     |       |                            |             |           |          |            |         |        |        |            |         |        |        |
|-----|-------|----------------------------|-------------|-----------|----------|------------|---------|--------|--------|------------|---------|--------|--------|
| 130 | SNP 3 | p87681-rs838883            | 3' flanking | A, 0.0459 | AA/GA/GG | 1/65/646   | -0.9433 | 0.0427 |        | 1/62/659   | -0.0535 | 0.9639 |        |
| 130 | SNP 4 | p87694-<br>chr12_125261826 | 3' flanking | T, 0.002  | CC/CT    | 722/3      | 3.4021  | 0.1098 |        | 731/3      | 3.0751  | 0.5620 |        |
| 131 | SNP 1 | p87611-rs190688220         | 3' flanking | T, 0.0316 | CC/CT    | 691/46     | 0.8329  | 0.1355 | 0.0653 | 697/46     | 1.7851  | 0.1993 | 0.6272 |
| 131 | SNP 2 | p87681-rs838883            | 3' flanking | A, 0.0459 | AA/GA/GG | 1/65/646   | -0.9433 | 0.0427 |        | 1/62/659   | -0.0535 | 0.9639 |        |
| 131 | SNP 3 | p87694-<br>chr12_125261826 | 3' flanking | T, 0.002  | CC/CT    | 722/3      | 3.4021  | 0.1098 |        | 731/3      | 3.0751  | 0.5620 |        |
| 131 | SNP 4 | p87723-rs838881            | 3' flanking | T, 0.3183 | TT/CT/CC | 63/341/332 | 0.1390  | 0.5146 |        | 65/344/338 | -0.1897 | 0.7187 |        |
| 132 | SNP 1 | p87681-rs838883            | 3' flanking | A, 0.0459 | AA/GA/GG | 1/65/646   | -0.9433 | 0.0427 | 0.1085 | 1/62/659   | -0.0535 | 0.9639 | 0.9672 |
| 132 | SNP 2 | chr12_125261826            | 3' flanking | T, 0.002  | CC/CT    | 722/3      | 3.4021  | 0.1098 |        | 731/3      | 3.0751  | 0.5620 |        |
| 132 | SNP 3 | p87723-rs838881            | 3' flanking | T, 0.3183 | TT/CT/CC | 63/341/332 | 0.1390  | 0.5146 |        | 65/344/338 | -0.1897 | 0.7187 |        |
| 132 | SNP 4 | p87749-rs76465225          | 3' flanking | A, 0.0844 | AA/GA/GG | 7/109/620  | -0.1992 | 0.5583 |        | 7/111/629  | -0.1205 | 0.8865 |        |
| 133 | SNP 1 | p87694-<br>chr12_125261826 | 3' flanking | T, 0.002  | CC/CT    | 722/3      | 3.4021  | 0.1098 | 0.5109 | 731/3      | 3.0751  | 0.5620 | 0.9769 |
| 133 | SNP 2 | p87723-rs838881            | 3' flanking | T, 0.3183 | TT/CT/CC | 63/341/332 | 0.1390  | 0.5146 |        | 65/344/338 | -0.1897 | 0.7187 |        |
| 133 | SNP 3 | p87749-rs76465225          | 3' flanking | A, 0.0844 | AA/GA/GG | 7/109/620  | -0.1992 | 0.5583 |        | 7/111/629  | -0.1205 | 0.8865 |        |
| 133 | SNP 4 | p87927-rs838880            | 3' flanking | A, 0.2414 | AA/GA/GG | 39/275/418 | 0.0198  | 0.9314 |        | 40/280/423 | -0.2130 | 0.7056 |        |

ApoA-I, apolipoprotein A-I; del/D, deletion; HDL-C, high-density lipoprotein cholesterol; ins/I, insertion; MA, minor allele; MAF, minor allele frequency; NA, not analyzed; SNP, single nucleotide polymorphism; UTR, untranslated region; W, wild type allele for insertion or deletion on RefSeq.

All alleles on the reverse strand. Splice site is defined as  $\pm 20$  bp from the start or end of an exon.

HDL-C and ApoA-I variables were Box-Cox transformed.

Results were adjusted for covariates: sex, age, waist, current smoking (yes/no), and, minutes of daily walking or biking to work (jobmin) for HDL-C; sex and age for ApoA-I.

SNP 1-SNP 4 are in the 5' to 3' direction and shown as "SNP name-SNP ID/Chromosome 12 Position (for novel variants)". All 10 novel variants identified in this study have been submitted to dbSNP database (ID: SCARB1\_AB): [http://www.ncbi.nlm.nih.gov/SNP/snp\\_viewTable.cgi?handle=KAMBOH](http://www.ncbi.nlm.nih.gov/SNP/snp_viewTable.cgi?handle=KAMBOH).

Significant global  $P$ -values ( $P < 0.05$ ) are shown in **bold**, see haplotype association plots in Figure 3.

<sup>a</sup> RefSeq of *SCARB1*: hg19, NM\_005505 (CHIP Bioinformatics).

<sup>b</sup> dbSNP build 139: GRCh37.p10.

<sup>d</sup> Close to a miRNA-145 seed site based on TargetScanHuman (version 6.2, <http://www.targetscan.org/>).
