# Supplementary material for: Genetic contribution of SCARB1 variants to lipid traits in African Blacks: a candidate gene association study
Source: Springer Nature journal article supplement (doi:10.1186/s12881-015-0250-6), 2015-11-12
Supplement: MOESM18 [file 9741426]

**Table S13. RegulomeDB scores and functional assignments of 153 SCARB1 variants.**

| SNP Name <sup>a</sup>  | SNP ID <sup>b</sup> | Chr12 Position <sup>c</sup> | Location             | Amino Acid Change | Indels | Major/Minor Alleles | MAF    | Assoc Trait(s) <sup>d</sup> | RegDB Score <sup>e</sup> | RegDB Functional Assignments                                                                                                                                                                                                                                                                                                                                                                                                                                                                                                                                                                                                                                                                                                                                                                                                                                                                                             |
|------------------------|---------------------|-----------------------------|----------------------|-------------------|--------|---------------------|--------|-----------------------------|--------------------------|--------------------------------------------------------------------------------------------------------------------------------------------------------------------------------------------------------------------------------------------------------------------------------------------------------------------------------------------------------------------------------------------------------------------------------------------------------------------------------------------------------------------------------------------------------------------------------------------------------------------------------------------------------------------------------------------------------------------------------------------------------------------------------------------------------------------------------------------------------------------------------------------------------------------------|
| p972                   | rs181338950         | 125348548                   | 5' flanking-promoter |                   |        | C/T                 | 0.048  |                             | 2a                       | Motifs Footprinting SP1, Motifs PWM Zfp410, Motifs PWM SP1, Motifs PWM KROX, Motifs Footprinting Sp1, Motifs Footprinting SP4, Motifs PWM UF1H3BETA, Motifs Footprinting KROX, Motifs Footprinting Klf4, Motifs PWM Bcl6b, Motifs Footprinting UF1H3BETA, Motifs PWM Klf4, Motifs PWM Sp1, Motifs PWM SP4, Chromatin_Structure FAIRE, Chromatin_Structure DNase-seq, Protein_Binding ChIP-seq GATA1, Protein_Binding ChIP-seq GABPA, Protein_Binding ChIP-seq EGR1, Protein_Binding ChIP-seq TFAP2C, Protein_Binding ChIP-seq TFAP2A, Protein_Binding ChIP-seq MYC, Protein_Binding ChIP-seq MAX, Protein_Binding ChIP-seq IRF1, Protein_Binding ChIP-seq ELF1, Protein_Binding ChIP-seq SP1, Protein_Binding ChIP-seq CCNT2, Protein_Binding ChIP-seq TBP, Protein_Binding ChIP-seq YY1, Protein_Binding ChIP-seq POLR2A, Protein_Binding ChIP-seq TAF1, Protein_Binding ChIP-seq ZBTB7A, Protein_Binding ChIP-seq CTCF |
| p1048 insC (1048_1049) |                     | 125348472                   | Exon 1-5' UTR        |                   | insC   | [-/C]               | 0.0079 |                             | 2a                       | Motifs PWM HIC1, Motifs Footprinting AP-2gamma, Motifs Footprinting TFAP2A, Motifs Footprinting AP-2alpha, Motifs Footprinting HIC1, Motifs PWM AP-2alpha, Motifs PWM AP-2gamma, Motifs PWM AP-2, Motifs PWM TFAP2A, Motifs Footprinting AP-2, Chromatin_Structure FAIRE, Chromatin_Structure DNase-seq, Protein_Binding ChIP-seq GATA1, Protein_Binding ChIP-seq SIN3A, Protein_Binding ChIP-seq HEY1, Protein_Binding ChIP-seq EGR1, Protein_Binding ChIP-seq TFAP2C, Protein_Binding ChIP-seq TFAP2A, Protein_Binding ChIP-seq IRF1, Protein_Binding ChIP-seq RAD21, Protein_Binding ChIP-seq SMC3, Protein_Binding ChIP-seq SP1, Protein_Binding ChIP-seq CCNT2, Protein_Binding ChIP-seq TBP, Protein_Binding ChIP-seq POLR2A, Protein_Binding ChIP-seq TAF1, Protein_Binding ChIP-seq CTCF, Protein_Binding ChIP-seq CTCF, Protein_Binding ChIP-seq EBF1, Protein_Binding ChIP-seq CDX2                            |
| p1257                  | rs4238001           | 125348263                   | Exon 1               | Gly2Ser           |        | G/A                 | 0.032  |                             | 4                        | Chromatin_Structure FAIRE, Chromatin_Structure DNase-seq, Protein_Binding ChIP-seq GATA1, Protein_Binding ChIP-seq MXI1, Protein_Binding ChIP-seq TFAP2C, Protein_Binding ChIP-seq TFAP2A, Protein_Binding ChIP-seq POU2F2, Protein_Binding ChIP-seq RAD21, Protein_Binding ChIP-seq CCNT2, Protein_Binding ChIP-seq E2F6, Protein_Binding ChIP-seq POLR2A, Protein_Binding ChIP-seq TAF1, Protein_Binding ChIP-seq CDX2                                                                                                                                                                                                                                                                                                                                                                                                                                                                                                 |
| p1265                  | rs2070242           | 125348255                   | Exon 1               | Ser4Ser           |        | C/T                 | 0.1284 |                             | 2b                       | Motifs PWM E2F-1, Motifs Footprinting E2F-1, Chromatin_Structure FAIRE, Chromatin_Structure DNase-seq,                                                                                                                                                                                                                                                                                                                                                                                                                                                                                                                                                                                                                                                                                                                                                                                                                   |

|        |             |           |          |          |     |        |                                   |    |                                                                                                                                                                                                                                                                                                                            |
|--------|-------------|-----------|----------|----------|-----|--------|-----------------------------------|----|----------------------------------------------------------------------------------------------------------------------------------------------------------------------------------------------------------------------------------------------------------------------------------------------------------------------------|
|        |             |           |          |          |     |        |                                   |    | Protein_Binding ChIP-seq GATA1,<br>Protein_Binding ChIP-seq MXI1,<br>Protein_Binding ChIP-seq TFAP2A,<br>Protein_Binding ChIP-seq POU2F2,<br>Protein_Binding ChIP-seq RAD21,<br>Protein_Binding ChIP-seq E2F6,<br>Protein_Binding ChIP-seq POLR2A,<br>Protein_Binding ChIP-seq TAF1,<br>Protein_Binding ChIP-seq CDX2      |
|        |             |           |          |          |     |        |                                   |    | Motifs Footprinting NRSF,<br>Motifs PWM REST,<br>Motifs PWM NRSF,<br>Motifs PWM Osr2,<br>Motifs Footprinting REST,<br>Chromatin_Structure FAIRE,<br>Chromatin_Structure DNase-seq,<br>Protein_Binding ChIP-seq GATA1,<br>Protein_Binding ChIP-seq MXI1,<br>Protein_Binding ChIP-seq E2F6,<br>Protein_Binding ChIP-seq CDX2 |
| p1316  | rs10396208  | 125348204 | Exon 1   | Cys21Cys | C/T | 0.0476 |                                   | 2b |                                                                                                                                                                                                                                                                                                                            |
| p1419  | rs201717369 | 125348101 | Intron 1 |          | G/A | 0.0121 |                                   | 4  | Chromatin_Structure DNase-seq,<br>Protein_Binding ChIP-seq GATA1,<br>Protein_Binding ChIP-seq E2F6,<br>Protein_Binding ChIP-seq ZBTB7A,<br>Protein_Binding ChIP-seq E2F1                                                                                                                                                   |
| p4072  | rs7139401   | 125345448 | Intron 1 |          | T/C | 0.4386 |                                   | 3b | Motifs PWM Mafk,<br>Motifs PWM Dlx3,<br>Motifs PWM Dlx4,<br>Protein_Binding ChIP-seq MAFK                                                                                                                                                                                                                                  |
| p5055  | rs11057869  | 125344465 | Intron 1 |          | G/A | 0.0740 |                                   | 7  | No data                                                                                                                                                                                                                                                                                                                    |
| p6600  | rs12831105  | 125342920 | Intron 1 |          | C/T | 0.1188 |                                   | 7  | No data                                                                                                                                                                                                                                                                                                                    |
| p7650  | rs11615630  | 125341870 | Intron 1 |          | G/A | 0.0436 |                                   | 5  | Chromatin_Structure DNase-seq                                                                                                                                                                                                                                                                                              |
| p10292 | rs4765181   | 125339228 | Intron 1 |          | G/T | 0.2490 |                                   | 5  | Chromatin_Structure FAIRE,<br>Chromatin_Structure DNase-seq                                                                                                                                                                                                                                                                |
| p10991 | rs10773112  | 125338529 | Intron 1 |          | G/A | 0.3534 |                                   | 4  | Chromatin_Structure FAIRE,<br>Chromatin_Structure DNase-seq,<br>Protein_Binding ChIP-seq FOXA1,<br>Protein_Binding ChIP-seq RXRA,<br>Protein_Binding ChIP-seq HDAC2                                                                                                                                                        |
| p13570 | rs11057864  | 125335950 | Intron 1 |          | G/T | 0.1180 |                                   | 4  | Chromatin_Structure FAIRE,<br>Chromatin_Structure DNase-seq,<br>Protein_Binding ChIP-seq HNF4A                                                                                                                                                                                                                             |
| p16565 | rs10773111  | 125332955 | Intron 1 |          | G/A | 0.1928 |                                   | 6  | Single_Nucleotides SCARB1 eQTL                                                                                                                                                                                                                                                                                             |
| p20207 | rs11057853  | 125329313 | Intron 1 |          | G/A | 0.4484 | HDL-C                             | 5  | Motifs PWM HNF4,<br>Motifs PWM HNF4A,<br>Motifs PWM HNF4directrepeat1,<br>Chromatin_Structure FAIRE,<br>Chromatin_Structure DNase-seq                                                                                                                                                                                      |
| p20694 | rs11057852  | 125328826 | Intron 1 |          | G/A | 0.1050 |                                   | 7  | No data                                                                                                                                                                                                                                                                                                                    |
| p20741 | rs11057851  | 125328779 | Intron 1 |          | C/T | 0.3237 | HDL-C<br>(best<br>SNP),<br>ApoA-I | 5  | Chromatin_Structure DNase-seq                                                                                                                                                                                                                                                                                              |
| p21145 | rs3924313   | 125328375 | Intron 1 |          | C/T | 0.1772 |                                   | 6  | Motifs PWM TFIIA                                                                                                                                                                                                                                                                                                           |
| p22116 | rs12370382  | 125327404 | Intron 1 |          | G/A | 0.0645 |                                   | 1f | Single_Nucleotides SCARB1 eQTL,<br>Chromatin_Structure DNase-seq                                                                                                                                                                                                                                                           |
| p22168 | rs7137797   | 125327352 | Intron 1 |          | T/C | 0.3977 |                                   | 2b | Motifs PWM Staf,<br>Motifs Footprinting Staf,<br>Motifs Footprinting zfn143,<br>Motifs PWM zfn143,<br>Chromatin_Structure DNase-seq,<br>Protein_Binding ChIP-seq GATA1                                                                                                                                                     |
| p22331 | rs6488944   | 125327189 | Intron 1 |          | T/G | 0.1474 |                                   | 4  | Chromatin_Structure DNase-seq,<br>Protein_Binding ChIP-seq GATA1,<br>Protein_Binding ChIP-seq EP300,<br>Protein_Binding ChIP-seq GATA2                                                                                                                                                                                     |
| p22675 | rs12425134  | 125326845 | Intron 1 |          | G/T | 0.0526 |                                   | 4  | Chromatin_Structure DNase-seq,<br>Protein_Binding ChIP-seq GATA1                                                                                                                                                                                                                                                           |
| p28137 | rs12229555  | 125321383 | Intron 1 |          | A/G | 0.3896 |                                   | 7  | No data                                                                                                                                                                                                                                                                                                                    |
| p28692 | rs4765622   | 125320828 | Intron 1 |          | C/T | 0.2565 |                                   | 5  | Chromatin_Structure DNase-seq                                                                                                                                                                                                                                                                                              |
| p28957 | rs11057844  | 125320563 | Intron 1 |          | G/A | 0.2362 |                                   | 5  | Motifs PWM HTF,<br>Motifs Footprinting HTF,<br>Protein_Binding ChIP-seq GATA1                                                                                                                                                                                                                                              |
| p29749 | rs10846751  | 125319771 | Intron 1 |          | C/T | 0.4492 |                                   | 7  | No data                                                                                                                                                                                                                                                                                                                    |
| p31072 | rs10846749  | 125318448 | Intron 1 |          | C/G | 0.4461 |                                   | 4  | Chromatin_Structure DNase-seq,<br>Protein_Binding ChIP-seq EP300,<br>Protein_Binding ChIP-seq MAX,<br>Protein_Binding ChIP-seq NANOG,<br>Protein_Binding ChIP-seq USF1,<br>Protein_Binding ChIP-seq TCF4,                                                                                                                  |

|                |             |           |          |           |        |        |                  |                                                                                                                                                                                                                                                                                                                                                                                                                                                                         |
|----------------|-------------|-----------|----------|-----------|--------|--------|------------------|-------------------------------------------------------------------------------------------------------------------------------------------------------------------------------------------------------------------------------------------------------------------------------------------------------------------------------------------------------------------------------------------------------------------------------------------------------------------------|
|                |             |           |          |           |        |        |                  | Protein_Binding ChIP-seq SP1,<br>Protein_Binding ChIP-seq JUND,<br>Protein_Binding ChIP-seq TCF12,<br>Protein_Binding ChIP-seq RXRA                                                                                                                                                                                                                                                                                                                                     |
| p31938         | rs10744182  | 125317582 | Intron 1 | G/A       | 0.1837 | 5      |                  | Chromatin_Structure DNase-seq                                                                                                                                                                                                                                                                                                                                                                                                                                           |
| p32129         | rs10773107  | 125317391 | Intron 1 | G/T       | 0.1009 | 7      |                  | No data                                                                                                                                                                                                                                                                                                                                                                                                                                                                 |
| p32273         | rs12580803  | 125317247 | Intron 1 | T/C       | 0.1006 | 5      |                  | Chromatin_Structure DNase-seq<br>Motifs Footprinting AR,<br>Motifs PWM AR,<br>Chromatin_Structure DNase-seq                                                                                                                                                                                                                                                                                                                                                             |
| p32290         | rs10744181  | 125317230 | Intron 1 | T/C       | 0.1238 | 5      |                  | Motifs PWM E2F-1,<br>Chromatin_Structure DNase-seq                                                                                                                                                                                                                                                                                                                                                                                                                      |
| p32395         | rs12581963  | 125317125 | Intron 1 | C/T       | 0.1314 | 5      |                  |                                                                                                                                                                                                                                                                                                                                                                                                                                                                         |
| p32750         | rs7967521   | 125316770 | Intron 1 | A/G       | 0.3425 | 7      |                  | No data                                                                                                                                                                                                                                                                                                                                                                                                                                                                 |
| p32777         | rs11057841  | 125316743 | Intron 1 | G/A       | 0.2805 | 7      |                  | No data                                                                                                                                                                                                                                                                                                                                                                                                                                                                 |
| p32860         | rs7967406   | 125316660 | Intron 1 | A/C       | 0.0991 | 6      |                  | Motifs PWM Hbp1, Motifs PWM Rfx3                                                                                                                                                                                                                                                                                                                                                                                                                                        |
| p33531         | rs11057838  | 125315989 | Intron 1 | C/A       | 0.2278 | 7      |                  | No data<br>Chromatin_Structure FAIRE,<br>Chromatin_Structure DNase-seq,<br>Protein_Binding ChIP-seq HNF4A,<br>Protein_Binding ChIP-seq TFAP2C,<br>Protein_Binding ChIP-seq TFAP2A,<br>Protein_Binding ChIP-seq STAT1,<br>Protein_Binding ChIP-seq GTF2F1,<br>Protein_Binding ChIP-seq TBP,<br>Protein_Binding ChIP-seq NR3C1,<br>Protein_Binding ChIP-seq STAT3,<br>Protein_Binding ChIP-seq ESR1,<br>Protein_Binding ChIP-seq POLR2A,<br>Protein_Binding ChIP-seq CDX2 |
| p36094         | rs11608336  | 125313426 | Intron 1 | G/A       | 0.1543 | 4      |                  | Chromatin_Structure FAIRE,<br>Chromatin_Structure DNase-seq,<br>Protein_Binding ChIP-seq HNF4A,<br>Protein_Binding ChIP-seq TFAP2A,<br>Protein_Binding ChIP-seq NR3C1,<br>Protein_Binding ChIP-seq ESR1                                                                                                                                                                                                                                                                 |
| p36461         | rs4765178   | 125313059 | Intron 1 | C/T       | 0.1671 | 4      |                  | Chromatin_Structure FAIRE,<br>Chromatin_Structure DNase-seq,<br>Protein_Binding ChIP-seq HNF4A,<br>Protein_Binding ChIP-seq EP300,<br>Protein_Binding ChIP-seq TFAP2C,<br>Protein_Binding ChIP-seq AR,<br>Protein_Binding ChIP-seq FOXA1,<br>Protein_Binding ChIP-seq CDX2                                                                                                                                                                                              |
| p36908         | rs10846745  | 125312612 | Intron 1 | C/G       | 0.3257 | 4      |                  | Chromatin_Structure FAIRE,<br>Chromatin_Structure DNase-seq,<br>Protein_Binding ChIP-seq HNF4A,<br>Protein_Binding ChIP-seq EP300,<br>Protein_Binding ChIP-seq TFAP2C,<br>Protein_Binding ChIP-seq MAX,<br>Protein_Binding ChIP-seq AR,<br>Protein_Binding ChIP-seq ESR1,<br>Protein_Binding ChIP-seq FOXA1,<br>Protein_Binding ChIP-seq CDX2,<br>Protein_Binding ChIP-seq GATA3                                                                                        |
| p37095         | rs10846744  | 125312425 | Intron 1 | C/G       | 0.3056 | 4      |                  |                                                                                                                                                                                                                                                                                                                                                                                                                                                                         |
| p41632         | rs6488943   | 125307888 | Intron 1 | A/C       | 0.2954 | 5      |                  | Chromatin_Structure DNase-seq                                                                                                                                                                                                                                                                                                                                                                                                                                           |
| p42467         | rs11057830  | 125307053 | Intron 1 | C/T       | 0.1523 | 7      |                  | No data                                                                                                                                                                                                                                                                                                                                                                                                                                                                 |
| p45516         | rs1902569   | 125304004 | Intron 1 | G/A       | 0.1544 | 5      | HDL-C            | Chromatin_Structure DNase-seq                                                                                                                                                                                                                                                                                                                                                                                                                                           |
| p45627         | rs12297372  | 125303893 | Intron 1 | A/G       | 0.0487 | 5      |                  | Chromatin_Structure DNase-seq                                                                                                                                                                                                                                                                                                                                                                                                                                           |
| p46964         | rs114061302 | 125302556 | Intron 1 | G/A       | 0.0388 | 4      |                  | Chromatin_Structure DNase-seq,<br>Protein_Binding ChIP-seq IKZF1                                                                                                                                                                                                                                                                                                                                                                                                        |
| p48969         | rs2343394   | 125300551 | Intron 2 | C/T       | 0.1898 | 5      |                  | Chromatin_Structure DNase-seq                                                                                                                                                                                                                                                                                                                                                                                                                                           |
| p49537         | rs7305310   | 125299983 | Intron 2 | C/T       | 0.1007 | 5      |                  | Chromatin_Structure DNase-seq<br>Motifs PWM Asc2, Motifs PWM E47,<br>Motifs Footprinting E47,<br>Chromatin_Structure FAIRE,<br>Chromatin_Structure DNase-seq                                                                                                                                                                                                                                                                                                            |
| p49570<br>delC | rs145376237 | 125299950 | Intron 2 | delC      | [C/-]  | 0.2276 |                  |                                                                                                                                                                                                                                                                                                                                                                                                                                                                         |
| p49690         | rs4765615   | 125299830 | Intron 2 | G/A       | 0.4426 | 5      | HDL-C,<br>ApoA-I | Chromatin_Structure FAIRE,<br>Chromatin_Structure DNase-seq<br>Motifs PWM Gm397,<br>Motifs PWM Zscan4,<br>Chromatin_Structure FAIRE,<br>Chromatin_Structure DNase-seq                                                                                                                                                                                                                                                                                                   |
| p49759         | rs146272788 | 125299761 | Intron 2 | C/T       | 0.0020 | 5      |                  | Motifs Footprinting Pax-3,<br>Motifs PWM Pax-3,<br>Chromatin_Structure DNase-seq                                                                                                                                                                                                                                                                                                                                                                                        |
| p49978         | rs5891      | 125299542 | Exon 3   | Val135Ile | G/A    | 0.0058 |                  | Chromatin_Structure DNase-seq                                                                                                                                                                                                                                                                                                                                                                                                                                           |

|        |             |           |                          |           |     |        |    |                                                                                                                                                                                                                                                                            |
|--------|-------------|-----------|--------------------------|-----------|-----|--------|----|----------------------------------------------------------------------------------------------------------------------------------------------------------------------------------------------------------------------------------------------------------------------------|
| p50024 | rs368880622 | 125299496 | Intron 3                 |           | G/T | 0.0026 | 5  | Chromatin_Structure DNase-seq                                                                                                                                                                                                                                              |
| p50118 | rs58710319  | 125299402 | Intron 3                 |           | C/T | 0.0208 | 5  | Chromatin_Structure DNase-seq                                                                                                                                                                                                                                              |
| p50151 | rs2278986   | 125299369 | Intron 3                 |           | T/C | 0.1933 | 5  | Chromatin_Structure DNase-seq                                                                                                                                                                                                                                              |
| p50380 | rs141748317 | 125299140 | Intron 3                 |           | A/G | 0.0112 | 2b | Motifs Footprinting HEN1,<br>Motifs PWM HEN1,<br>Chromatin_Structure DNase-seq,<br>Protein_Binding ChIP-seq IKZF1                                                                                                                                                          |
| p50489 | rs61320152  | 125299031 | Intron 3                 |           | G/T | 0.0257 | 4  | Chromatin_Structure DNase-seq,<br>Protein_Binding ChIP-seq IKZF1                                                                                                                                                                                                           |
| p50954 |             | 125298566 | Intron 4                 |           | T/C | 0.0007 | 5  | Chromatin_Structure DNase-seq                                                                                                                                                                                                                                              |
| p51888 | rs7138304   | 125297632 | Intron 4                 |           | C/T | 0.1079 | 2b | Motifs Footprinting TRF1,<br>Motifs PWM TRF1,<br>Motifs Footprinting IRF-1,<br>Motifs PWM IRF-1,<br>Chromatin_Structure DNase-seq,<br>Protein_Binding ChIP-seq NFYB,<br>Protein_Binding ChIP-seq USF2,<br>Protein_Binding ChIP-seq USF1,<br>Protein_Binding ChIP-seq IKZF1 |
| p52096 | rs10846739  | 125297424 | Intron 4                 |           | A/G | 0.4693 | 3a | Motifs PWM Tbp,<br>Chromatin_Structure DNase-seq,<br>Protein_Binding ChIP-seq IKZF1                                                                                                                                                                                        |
| p52556 | rs11057820  | 125296964 | Intron 4                 |           | G/A | 0.1000 | 5  | Chromatin_Structure DNase-seq                                                                                                                                                                                                                                              |
| p52610 | rs10846738  | 125296910 | Intron 4                 |           | C/T | 0.1349 | 4  | Chromatin_Structure DNase-seq,<br>Protein_Binding ChIP-seq SPI1                                                                                                                                                                                                            |
| p52919 |             | 125296601 | Intron 4                 |           | G/T | 0.0013 | 5  | Motifs PWM Zfp281,<br>Motifs PWM MZF1_5-13,<br>Motifs Footprinting MZF1_5-13,<br>Motifs PWM Gabpa,<br>Chromatin_Structure FAIRE,<br>Chromatin_Structure DNase-seq                                                                                                          |
| p52956 | rs77740046  | 125296564 | Intron 4                 |           | C/T | 0.0546 | 5  | Chromatin_Structure FAIRE,<br>Chromatin_Structure DNase-seq                                                                                                                                                                                                                |
| p52995 | rs113910315 | 125296525 | Intron 4-<br>splice site |           | T/G | 0.0020 | 5  | Motifs PWM Zic3, Motifs PWM Zic2,<br>Motifs PWM Zic1,<br>Chromatin_Structure FAIRE,<br>Chromatin_Structure DNase-seq                                                                                                                                                       |
| p53128 | rs372212527 | 125296392 | Intron 5                 |           | C/T | 0.005  | 5  | Chromatin_Structure FAIRE,<br>Chromatin_Structure DNase-seq                                                                                                                                                                                                                |
| p53159 | rs59809936  | 125296361 | Intron 5                 |           | G/A | 0.049  | 5  | Chromatin_Structure FAIRE,<br>Chromatin_Structure DNase-seq                                                                                                                                                                                                                |
| p53359 | rs112371713 | 125296161 | Intron 5                 |           | G/A | 0.1243 | 5  | Chromatin_Structure DNase-seq                                                                                                                                                                                                                                              |
| p53372 | rs115604379 | 125296148 | Intron 5                 |           | C/T | 0.0066 | 5  | Chromatin_Structure DNase-seq                                                                                                                                                                                                                                              |
| p53481 | rs143611171 | 125296039 | Intron 5                 |           | C/T | 0.099  | 6  | Motifs Footprinting ARP-1(COUP-TF2),<br>Motifs PWM ARP-1(COUP-TF2)                                                                                                                                                                                                         |
| p53790 | rs4765614   | 125295730 | Intron 5                 |           | G/A | 0.2653 | 5  | Chromatin_Structure DNase-seq                                                                                                                                                                                                                                              |
| p54445 | rs60910935  | 125295075 | Intron 5                 |           | A/G | 0.0418 | 4  | Chromatin_Structure DNase-seq,<br>Protein_Binding ChIP-seq RFX3                                                                                                                                                                                                            |
| p54475 | rs60227139  | 125295045 | Intron 5                 |           | C/T | 0.0437 | 4  | Chromatin_Structure DNase-seq,<br>Protein_Binding ChIP-seq RFX3                                                                                                                                                                                                            |
| p54492 | rs61762481  | 125295028 | Intron 5                 |           | G/A | 0.1005 | 4  | Chromatin_Structure DNase-seq,<br>Protein_Binding ChIP-seq RFX3                                                                                                                                                                                                            |
| p54611 |             | 125294909 | Intron 5                 |           | T/C | 0.0007 | 4  | Chromatin_Structure DNase-seq,<br>Protein_Binding ChIP-seq RFX3                                                                                                                                                                                                            |
| p54627 |             | 125294893 | Intron 5                 |           | G/C | 0.0020 | 4  | Chromatin_Structure DNase-seq,<br>Protein_Binding ChIP-seq RFX3                                                                                                                                                                                                            |
| p54856 |             | 125294664 | Intron 6                 |           | C/T | 0.0007 | 4  | Chromatin_Structure DNase-seq,<br>Protein_Binding ChIP-seq RFX3,<br>Protein_Binding ChIP-seq STAT3                                                                                                                                                                         |
| p55923 | rs838900    | 125293597 | Intron 6                 |           | G/A | 0.3921 | 7  | No data                                                                                                                                                                                                                                                                    |
| p55963 | rs7134858   | 125293557 | Intron 6                 |           | C/T | 0.1560 | 6  | ApoA-I<br>(best<br>SNP)<br>Motifs PWM STAT1                                                                                                                                                                                                                                |
| p56845 | rs838902    | 125292675 | Intron 6                 |           | A/G | 0.4249 | 5  | Motifs PWM Bbx,<br>Chromatin_Structure DNase-seq                                                                                                                                                                                                                           |
| p57004 | rs187562853 | 125292516 | Intron 6                 |           | G/A | 0.0098 | 4  | Chromatin_Structure DNase-seq,<br>Protein_Binding ChIP-seq GATA1                                                                                                                                                                                                           |
| p57107 | rs5892      | 125292413 | Exon 7                   | Phe301Phe | C/T | 0.0589 | 4  | Chromatin_Structure FAIRE,<br>Chromatin_Structure DNase-seq,<br>Protein_Binding ChIP-seq GATA1,<br>Protein_Binding ChIP-seq NR3C1                                                                                                                                          |
| p57508 | rs71458866  | 125292012 | Intron 7                 |           | G/A | 0.1130 | 4  | Chromatin_Structure DNase-seq,<br>Protein_Binding ChIP-seq GATA1                                                                                                                                                                                                           |
| p57592 | rs838903    | 125291928 | Intron 7                 |           | G/A | 0.3763 | 4  | Chromatin_Structure DNase-seq,<br>Protein_Binding ChIP-seq GATA1                                                                                                                                                                                                           |

|                |             |           |                          |           |       |              |    |                                                                                                                                                                                                                                                           |
|----------------|-------------|-----------|--------------------------|-----------|-------|--------------|----|-----------------------------------------------------------------------------------------------------------------------------------------------------------------------------------------------------------------------------------------------------------|
| p58514         | rs838905    | 125291006 | Intron 7                 |           | T/C   | 0.4329       | 4  | Chromatin_Structure DNase-seq, Protein_Binding ChIP-seq CEBPB                                                                                                                                                                                             |
| p58664         | rs865716    | 125290856 | Intron 7                 |           | A/T   | 0.2708       | 5  | Chromatin_Structure DNase-seq                                                                                                                                                                                                                             |
| p60255         | rs3782287   | 125289265 | Intron 7                 |           | C/T   | 0.2831       | 5  | Chromatin_Structure DNase-seq                                                                                                                                                                                                                             |
| p61872         | rs838909    | 125287648 | Intron 7                 |           | C/T   | 0.2199       | 4  | Chromatin_Structure DNase-seq, Protein_Binding ChIP-seq RFX3                                                                                                                                                                                              |
| p62140         | rs838910    | 125287380 | Intron 7                 |           | G/T   | 0.3047       | 5  | Chromatin_Structure FAIRE, Protein_Binding ChIP-seq RFX3                                                                                                                                                                                                  |
| p62409         | rs838911    | 125287111 | Intron 7                 |           | C/T   | 0.4211       | 5  | Chromatin_Structure FAIRE, Chromatin_Structure DNase-seq                                                                                                                                                                                                  |
| p62615         | rs7138386   | 125286905 | Intron 7                 |           | T/C   | 0.1137       | 5  | Chromatin_Structure FAIRE, Chromatin_Structure DNase-seq                                                                                                                                                                                                  |
| p63483         | rs838912    | 125286037 | Intron 7                 |           | G/A   | 0.0867       | 7  | No data                                                                                                                                                                                                                                                   |
| p64772         | rs5888      | 125284748 | Exon 8                   | Ala350Ala | C/T   | 0.0961       | 3a | Motifs PWM Nr2f2, Motifs PWM Rara, Motifs PWM PPARalpha:RXRalpha, Chromatin_Structure DNase-seq, Protein_Binding ChIP-seq RFX3, Protein_Binding ChIP-seq GATA2                                                                                            |
| p64923         | rs838915    | 125284597 | Intron 8                 |           | C/A   | 0.1435       | 5  | Motifs PWM AP-2, Chromatin_Structure DNase-seq                                                                                                                                                                                                            |
| p65999         | rs12819677  | 125283521 | Intron 8                 |           | G/A   | 0.2813       | 6  | Motifs PWM PPARG                                                                                                                                                                                                                                          |
| p67439         | rs961170    | 125282081 | Intron 8                 |           | G/A   | 0.0893       | 4  | Chromatin_Structure DNase-seq, Protein_Binding ChIP-seq SPI1                                                                                                                                                                                              |
| p67700         | rs1726374   | 125281820 | Intron 8                 |           | G/A   | 0.1933       | 7  | No data                                                                                                                                                                                                                                                   |
| p69013         | rs7135117   | 125280507 | Intron 8                 |           | A/G   | 0.2901       | 7  | No data                                                                                                                                                                                                                                                   |
| p69699         | rs10396210  | 125279821 | Intron 8-<br>splice site |           | G/A   | 0.1511       | 4  | Chromatin_Structure FAIRE, Chromatin_Structure DNase-seq, Protein_Binding ChIP-seq NFKB1, Protein_Binding ChIP-seq TCF12, Protein_Binding ChIP-seq POLR2A, Protein_Binding ChIP-seq EBF1, Motifs PWM RREB-1, Motifs PWM GR, Chromatin_Structure DNase-seq |
| p69994         | rs188094006 | 125279526 | Intron 9                 |           | C/T   | <u>0.005</u> | 5  | Motifs PWM RREB-1, Motifs PWM GR, Chromatin_Structure DNase-seq                                                                                                                                                                                           |
| p69995<br>delC | rs5801571   | 125279525 | Intron 9                 | delC      | [C/-] | 0.2761       | 5  | Motifs PWM RREB-1, Motifs PWM GR, Chromatin_Structure DNase-seq                                                                                                                                                                                           |
| p70088         | rs117585141 | 125279432 | Intron 9                 |           | G/A   | 0.158        | 7  | No data                                                                                                                                                                                                                                                   |
| p70129         | rs1814575   | 125279391 | Intron 9                 |           | C/T   | 0.047        | 7  | No data                                                                                                                                                                                                                                                   |
| p70148         | rs183061101 | 125279372 | Intron 9                 |           | T/C   | <u>0.011</u> | 6  | Motifs PWM Nrf-2, Motifs PWM LUN-1                                                                                                                                                                                                                        |
| p70201         |             | 125279319 | Intron 9                 |           | T/C   | 0.0010       | 6  | Motifs PWM MEF2A                                                                                                                                                                                                                                          |
| p70292         | rs150388176 | 125279228 | Intron 9                 |           | C/T   | <u>0.016</u> | 5  | Chromatin_Structure DNase-seq, Motifs PWM EWSR1-FLI1, Motifs Footprinting EWSR1-FLI1, Chromatin_Structure DNase-seq                                                                                                                                       |
| p71867         | rs7954022   | 125277653 | Intron 9                 |           | C/T   | 0.1323       | 5  | Chromatin_Structure DNase-seq                                                                                                                                                                                                                             |
| p72197         | rs838861    | 125277323 | Intron 9                 |           | A/G   | 0.3777       | 7  | No data                                                                                                                                                                                                                                                   |
| p72777         | rs838862    | 125276743 | Intron 9                 |           | C/T   | 0.0887       | 5  | Chromatin_Structure DNase-seq                                                                                                                                                                                                                             |
| p75766         | rs838866    | 125273754 | Intron 9                 |           | T/C   | 0.2116       | 6  | Single_Nucleotides SCARB1 eQTL                                                                                                                                                                                                                            |
| p75778         | rs7301120   | 125273742 | Intron 9                 |           | C/T   | 0.1135       | 6  | Single_Nucleotides SCARB1 eQTL                                                                                                                                                                                                                            |
| p76204         | rs866793    | 125273316 | Intron 9                 |           | A/G   | 0.0520       | 7  | No data                                                                                                                                                                                                                                                   |
| p76757         | rs9919713   | 125272763 | Intron 9                 |           | A/T   | 0.4390       | 6  | Motifs PWM FOXJ2, Motifs PWM Alx-4, Motifs Footprinting FOXJ2, Motifs Footprinting Alx-4                                                                                                                                                                  |
| p77181         | rs146246031 | 125272339 | Intron 9                 |           | T/C   | 0.0053       | 7  | No data                                                                                                                                                                                                                                                   |
| p77250         | rs201901986 | 125272270 | Intron 9                 |           | G/T   | <u>0.095</u> | 6  | Motifs PWM Srf, Motifs PWM Mtf1, Motifs PWM Tcfap2e                                                                                                                                                                                                       |
| p77251         | rs34339961  | 125272269 | Intron 9                 |           | A/T   | 0.1177       | 6  | Motifs PWM Srf, Motifs PWM Mtf1, Motifs PWM Tcfap2e                                                                                                                                                                                                       |
| p77381         | rs138499966 | 125272139 | Intron 9                 |           | T/C   | 0.0046       | 6  | Motifs PWM Foxo1, Motifs PWM Freac-2, Motifs PWM Foxj3, Motifs PWM FOXO3, Motifs PWM HFH8(FOXF1A), Motifs PWM FOXJ2, Motifs PWM Freac-4, Motifs Footprinting Foxq1, Motifs PWM Foxa2, Motifs PWM HFH1(FOXQ1), Motifs PWM Foxk1,                           |

|        |             |           |                |                       |     |        |    |                                                                                                                                                                                                                                                                                                                                                                                                                 | Motifs Footprinting HFH1(FOXQ1),<br>Motifs PWM Foxq1,<br>Motifs PWM HNF3 |
|--------|-------------|-----------|----------------|-----------------------|-----|--------|----|-----------------------------------------------------------------------------------------------------------------------------------------------------------------------------------------------------------------------------------------------------------------------------------------------------------------------------------------------------------------------------------------------------------------|--------------------------------------------------------------------------|
| p77620 | rs377124254 | 125271900 | Intron 10      |                       | G/A | 0.0007 | 5  | Chromatin_Structure DNase-seq                                                                                                                                                                                                                                                                                                                                                                                   |                                                                          |
| p77682 | rs150082885 | 125271838 | Intron 10      |                       | A/G | 0.0106 | 5  | Chromatin_Structure DNase-seq                                                                                                                                                                                                                                                                                                                                                                                   |                                                                          |
| p77704 |             | 125271816 | Intron 10      |                       | C/A | 0.0040 | 5  | Chromatin_Structure DNase-seq                                                                                                                                                                                                                                                                                                                                                                                   |                                                                          |
| p77842 | rs2272310   | 125271678 | Intron 10      |                       | G/A | 0.0807 | 5  | Chromatin_Structure DNase-seq                                                                                                                                                                                                                                                                                                                                                                                   |                                                                          |
| p78255 | rs184052375 | 125271265 | Intron 10      |                       | A/G | 0.0072 | 4  | Chromatin_Structure FAIRE,<br>Chromatin_Structure DNase-seq,<br>Protein_Binding ChIP-seq SIX5,<br>Protein_Binding ChIP-seq MAX,<br>Protein_Binding ChIP-seq NANOG,<br>Protein_Binding ChIP-seq USF2,<br>Protein_Binding ChIP-seq USF1,<br>Protein_Binding ChIP-seq ATF3,<br>Protein_Binding ChIP-seq YY1,<br>Protein_Binding ChIP-seq TBP,<br>Protein_Binding ChIP-seq POLR2A,<br>Protein_Binding ChIP-seq TAF1 |                                                                          |
| p78402 | rs838898    | 125271118 | Intron 10      |                       | G/A | 0.0714 | 5  | Motifs PWM Hic1, Motifs PWM Eomes,<br>Chromatin_Structure FAIRE,<br>Chromatin_Structure DNase-seq                                                                                                                                                                                                                                                                                                               |                                                                          |
| p78430 | rs838897    | 125271090 | Intron 10      |                       | C/G | 0.3830 | 5  | Motifs PWM RNF96,<br>Motifs PWM AP-2,<br>Motifs Footprinting AP-2,<br>Chromatin_Structure FAIRE,<br>Chromatin_Structure DNase-seq                                                                                                                                                                                                                                                                               |                                                                          |
| p78747 | rs2293440   | 125270773 | Intron 11      |                       | T/C | 0.4112 | 5  | Chromatin_Structure DNase-seq                                                                                                                                                                                                                                                                                                                                                                                   |                                                                          |
| p78791 | rs75289200  | 125270729 | Intron 11      |                       | T/C | 0.0321 | 5  | Chromatin_Structure DNase-seq                                                                                                                                                                                                                                                                                                                                                                                   |                                                                          |
| p79721 | rs838896    | 125269799 | Intron 11      |                       | G/C | 0.3104 | 5  | ApoA-I<br>Chromatin_Structure DNase-seq                                                                                                                                                                                                                                                                                                                                                                         |                                                                          |
| p79828 | rs838895    | 125269692 | Intron 11      |                       | C/G | 0.3171 | 5  | Motifs PWM Pax-5,<br>Chromatin_Structure DNase-seq                                                                                                                                                                                                                                                                                                                                                              |                                                                          |
| p80045 | rs838893    | 125269475 | Intron 11      |                       | G/A | 0.3244 | 5  | Chromatin_Structure DNase-seq                                                                                                                                                                                                                                                                                                                                                                                   |                                                                          |
| p81863 | rs185445624 | 125267657 | Intron 11      |                       | G/A | 0.0020 | 5  | Motifs PWM ESR1,<br>Motifs PWM Rfx3,<br>Chromatin_Structure FAIRE,<br>Chromatin_Structure DNase-seq                                                                                                                                                                                                                                                                                                             |                                                                          |
| p82019 | rs838890    | 125267501 | Intron 11      |                       | C/T | 0.0320 | 5  | Chromatin_Structure FAIRE,<br>Chromatin_Structure DNase-seq                                                                                                                                                                                                                                                                                                                                                     |                                                                          |
| p82264 | rs141545424 | 125267256 | Exon 12        | Gly501Gly             | C/A | 0.0007 | 5  | Chromatin_Structure DNase-seq                                                                                                                                                                                                                                                                                                                                                                                   |                                                                          |
| p82340 | rs77483223  | 125267180 | Intron 12      |                       | G/A | 0.0231 | 5  | Motifs PWM Arid3a,<br>Chromatin_Structure DNase-seq                                                                                                                                                                                                                                                                                                                                                             |                                                                          |
| p82369 | rs75446635  | 125267151 | Intron 12      |                       | G/A | 0.0059 | 5  | Chromatin_Structure DNase-seq                                                                                                                                                                                                                                                                                                                                                                                   |                                                                          |
| p82434 | rs838889    | 125267086 | Intron 12      |                       | T/C | 0.0315 | 5  | Motifs PWM FOXP1,<br>Motifs Footprinting HFH3(FOX11),<br>Motifs PWM MRF-2,<br>Motifs Footprinting MRF-2,<br>Motifs PWM HFH3(FOX11),<br>Chromatin_Structure DNase-seq                                                                                                                                                                                                                                            |                                                                          |
| p83547 | rs838887    | 125265973 | Intron 12      |                       | C/G | 0.4564 | 5  | Chromatin_Structure DNase-seq                                                                                                                                                                                                                                                                                                                                                                                   |                                                                          |
| p83884 | rs7011106   | 125265636 | Intron 12      |                       | C/T | 0.2597 | 5  | ApoA-I<br>Chromatin_Structure DNase-seq                                                                                                                                                                                                                                                                                                                                                                         |                                                                          |
| p86245 | rs188375019 | 125263275 | Intron 12      |                       | C/T | 0.0341 | 4  | Chromatin_Structure FAIRE,<br>Chromatin_Structure DNase-seq,<br>Protein_Binding ChIP-seq BATF<br>Motifs PWM NGFI-C,<br>Motifs Footprinting NGFI-C,<br>Motifs Footprinting Sp3,<br>Motifs PWM Sp3,<br>Motifs PWM KROX,<br>Motifs PWM UF1H3BETA,<br>Motifs Footprinting KROX,<br>Motifs Footprinting UF1H3BETA,<br>Chromatin_Structure FAIRE,<br>Chromatin_Structure DNase-seq                                    |                                                                          |
| p86276 | rs7471155   | 125263244 | Intron 12      |                       | C/T | 0.1495 | 2b | Protein_Binding ChIP-seq BATF<br>Chromatin_Structure FAIRE,<br>Chromatin_Structure DNase-seq,<br>Protein_Binding ChIP-seq EGR1,<br>Protein_Binding ChIP-seq BATF                                                                                                                                                                                                                                                |                                                                          |
| p86316 | rs7011104   | 125263204 | Intron 12      |                       | G/T | 0.0487 | 4  |                                                                                                                                                                                                                                                                                                                                                                                                                 |                                                                          |
| p86481 | rs7011103   | 125263039 | Exon 13-3' UTR | Gly499Arg (isoform 2) | G/A | 0.2451 | 5  | Chromatin_Structure DNase-seq                                                                                                                                                                                                                                                                                                                                                                                   |                                                                          |
| p86967 | rs187492239 | 125262553 | Exon 13-3' UTR |                       | A/G | 0.0355 | 4  | Chromatin_Structure FAIRE,<br>Chromatin_Structure DNase-seq,<br>Protein_Binding ChIP-seq HNF4A,<br>Protein_Binding ChIP-seq HEY1,<br>Protein_Binding ChIP-seq TCF4,                                                                                                                                                                                                                                             |                                                                          |

|        |             |           |                |     |               |    |                                                                                                                                                                                                                                                                                                                                                                               |
|--------|-------------|-----------|----------------|-----|---------------|----|-------------------------------------------------------------------------------------------------------------------------------------------------------------------------------------------------------------------------------------------------------------------------------------------------------------------------------------------------------------------------------|
|        |             |           |                |     |               |    | Protein_Binding ChIP-seq JUND, Protein_Binding ChIP-seq POLR2A, Protein_Binding ChIP-seq HNF4G, Protein_Binding ChIP-seq FOSL2, Protein_Binding ChIP-seq HDAC2                                                                                                                                                                                                                |
|        |             |           |                |     |               |    | Motifs PWM HNF4alpha1, Motifs Footprinting HNF4alpha1, Chromatin_Structure FAIRE, Chromatin_Structure DNase-seq, Protein_Binding ChIP-seq HNF4A, Protein_Binding ChIP-seq HEY1, Protein_Binding ChIP-seq TCF4, Protein_Binding ChIP-seq JUND, Protein_Binding ChIP-seq POLR2A, Protein_Binding ChIP-seq HNF4G, Protein_Binding ChIP-seq FOSL2, Protein_Binding ChIP-seq HDAC2 |
| p87011 | rs58032386  | 125262509 | Exon 13-3' UTR | C/T | 0.1417        | 2a | Chromatin_Structure DNase-seq, Protein_Binding ChIP-seq TCF4                                                                                                                                                                                                                                                                                                                  |
| p87195 | rs10396211  | 125262325 | Exon 13-3' UTR | G/C | <u>0.122</u>  | 4  | Chromatin_Structure DNase-seq, Protein_Binding ChIP-seq ELF1                                                                                                                                                                                                                                                                                                                  |
| p87266 | rs150512235 | 125262254 | Exon 13-3' UTR | T/C | 0.0057        | 4  | Motifs PWM DEAF1, Motifs Footprinting DEAF1, Chromatin_Structure DNase-seq, Protein_Binding ChIP-seq CEBPB, Protein_Binding ChIP-seq ELF1, Protein_Binding ChIP-seq FOXA2, Protein_Binding ChIP-seq JUND, Protein_Binding ChIP-seq FOSL2, Protein_Binding ChIP-seq FOXA1                                                                                                      |
| p87416 | rs838884    | 125262104 | 3' flanking    | C/T | <u>0.301</u>  | 2b | Chromatin_Structure FAIRE, Chromatin_Structure DNase-seq, Protein_Binding ChIP-seq CEBPB, Protein_Binding ChIP-seq ELF1, Protein_Binding ChIP-seq FOXA2, Protein_Binding ChIP-seq JUND, Protein_Binding ChIP-seq FOSL2, Protein_Binding ChIP-seq FOXA1                                                                                                                        |
| p87459 |             | 125262061 | 3' flanking    | C/T | <u>0.005</u>  | 4  | Chromatin_Structure DNase-seq, Protein_Binding ChIP-seq CEBPB, Protein_Binding ChIP-seq ELF1, Protein_Binding ChIP-seq FOXA2, Protein_Binding ChIP-seq JUND, Protein_Binding ChIP-seq FOSL2, Protein_Binding ChIP-seq FOXA1                                                                                                                                                   |
| p87611 | rs190688220 | 125261909 | 3' flanking    | C/T | 0.0316        | 4  | Chromatin_Structure FAIRE, Chromatin_Structure DNase-seq, Motifs PWM TP53, Motifs PWM p53, Chromatin_Structure FAIRE, Chromatin_Structure DNase-seq                                                                                                                                                                                                                           |
| p87681 | rs838883    | 125261839 | 3' flanking    | G/A | 0.0459        | 5  | No data                                                                                                                                                                                                                                                                                                                                                                       |
| p87694 |             | 125261826 | 3' flanking    | C/T | 0.0020        | 5  | Motifs PWM NFIL3, Motifs Footprinting NFIL3, Motifs PWM TFIIA, Chromatin_Structure FAIRE                                                                                                                                                                                                                                                                                      |
| p87707 | rs838882    | 125261813 | 3' flanking    | G/A | <u>0.303</u>  | 7  | No data                                                                                                                                                                                                                                                                                                                                                                       |
| p87723 | rs838881    | 125261797 | 3' flanking    | C/T | 0.3183        | 6  | No data                                                                                                                                                                                                                                                                                                                                                                       |
| p87749 | rs76465225  | 125261771 | 3' flanking    | G/A | 0.0844        | 7  | No data                                                                                                                                                                                                                                                                                                                                                                       |
| p87927 | rs838880    | 125261593 | 3' flanking    | G/A | <u>0.2414</u> | 5  | Chromatin_Structure DNase-seq                                                                                                                                                                                                                                                                                                                                                 |

ApoA-I, apolipoprotein A-I; HDL-C, high-density lipoprotein cholesterol; del, deletion; eQTL, expression quantitative trait loci; Indels, insertion and deletion variations; ins, insertion; MAF, minor allele frequency; RegDB, RegulomeDB score; SNP, single nucleotide polymorphism; UTR, untranslated region.

All alleles on the reverse strand. Splice site is defined as  $\pm 20$  bp from the start or end of an exon.

A list of 83 variants identified by sequencing is shown in Additional file 3 Table S3.

A list of 68 common HapMap-YRI tagSNPs successfully genotyped in our entire sample is shown in Additional file 7 Table S5.

A list of 138 genotyped variants in our entire sample is shown in Additional file 9 Table S6.

Underlined MAFs are based on our sequencing data/sample due to genotyping failure (Additional file 3 Table S3).

Double underlined MAFs are identified in our sequencing stage but not selected for genotyping based on the linkage disequilibrium plot (Additional file 3 Table S3; Additional file 5 Figure S1 and Additional file 6 Figure S2).

All 10 novel variants identified in this study have been submitted to dbSNP database (batch ID: SCARB1\_AB): [http://www.ncbi.nlm.nih.gov/SNP/snp\\_viewTable.cgi?handle=KAMBOH](http://www.ncbi.nlm.nih.gov/SNP/snp_viewTable.cgi?handle=KAMBOH).

<sup>a,c</sup> RefSeq of SCARB1: hg19, NM\_005505 (CHIP Bioinformatics).

<sup>b</sup> dbSNP build 139: GRCh37.p10.

<sup>d</sup> Evidence is based on SNPs with MAF  $\geq 5\%$  exhibiting nominally significant association with either HDL-C or ApoA-I ( $P < 0.05$ ; Additional file 14 Table S9 and Additional file 15 Table S10) in single-site analysis observed in the current study.

<sup>e</sup> The RegulomeDB (version 1.0) scoring scheme is described at the footnote of Additional file 17 Table S12 or can be seen at <http://regulome.stanford.edu/help>.

<sup>f</sup> Close to a miRNA-145 seed site based on TargetScanHuman (version 6.2, <http://www.targetscan.org/>).
